# Supplementary material for: Metabolomics combined with clinical analysis explores metabolic changes and potential serum metabolite biomarkers of antineutrophil cytoplasmic antibody-associated vasculitis with renal impairment
Source: PeerJ journal article supplement (doi:10.7717/peerj.15051), 2023-03-15
Supplement: FigS1.pdf [file FigS1.pdf]

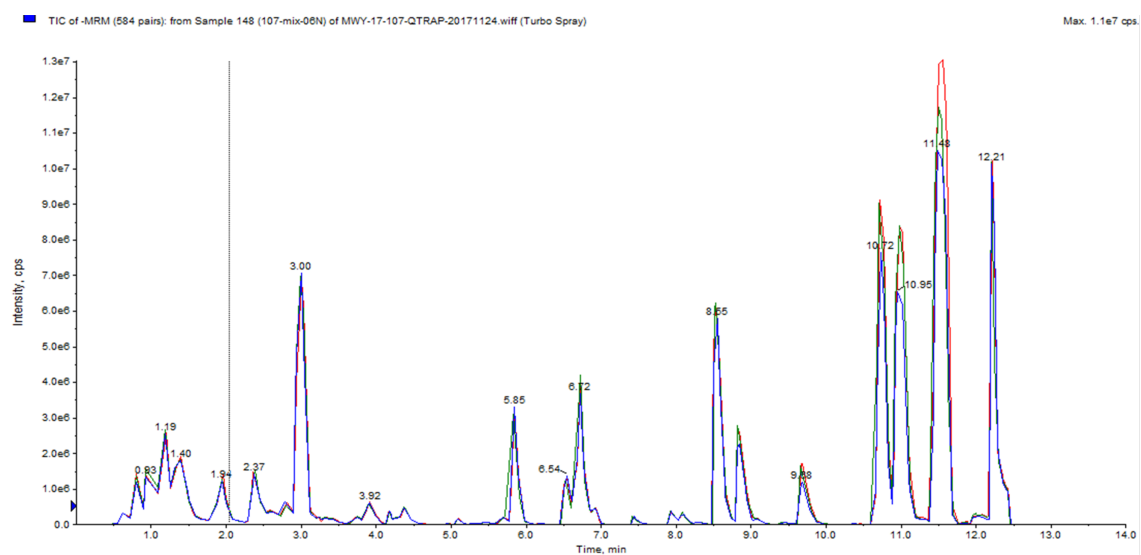

A

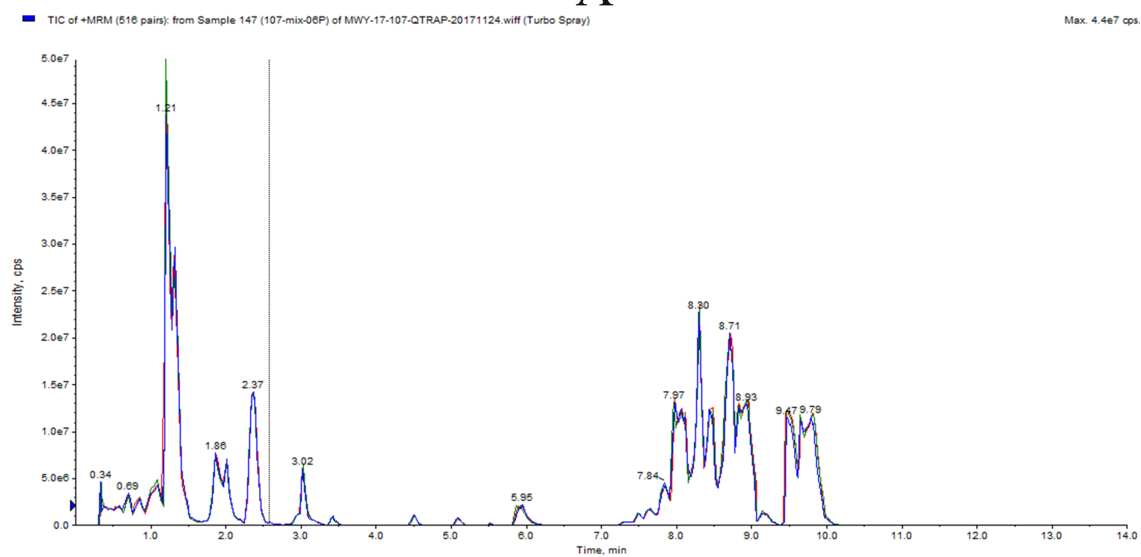

B

**Fig. S1** The curves of total ion current of quality control samples were highly overlapped. (A) total ion current overlap pattern of quality control samples in negative ion mode; (B) total ion current overlap pattern of quality control samples in positive ion mode.
