# Supplementary material for: Metabolomics combined with clinical analysis explores metabolic changes and potential serum metabolite biomarkers of antineutrophil cytoplasmic antibody-associated vasculitis with renal impairment
Source: PeerJ. 2023 Mar 15;11:e15051. doi: 10.7717/peerj.15051 (PMC10024486; doi:10.7717/peerj.15051)
Supplement: Supplemental Information 1 [file peerj-11-15051-s001.xlsx]

## Sheet: Sheet1
Compounds	Class I	Q1 (Da)	Molecular Weight (Da)	Ionization model	B1	B2	B3	B4	B5	B6	B7	B8	B9	B10	B11	B12	B13	B14	B15	B16	B17	B18	B19	B20	B21	B22	B23	B24	B25	B26	B27	B28	B29	B30	B31	B32	B33	A1	A2	A3	A4	A5	A6	A7	A8	A9	A10	A11	A12
4-Hydroxy-3-Methoxymandelate	Organic Acids	197	198.053	[M-H]-	0.852094	0.850489	0.556765	0.750585	1.30839	0.979276	1.26806	0.834965	0.925336	1.11573	1.19223	0.941357	0.901322	0.999134	1.11505	0.963137	1.05592	0.790861	0.795236	1.18029	0.939186	1.02683	0.970497	0.865542	0.867035	1.14258	1.19636	1.35267	1.36804	1.2172	1.34339	1.43106	1.51618	1.1071	0.955412	0.647992	0.768636	0.636591	0.771814	0.735917	0.818204	0.918695	1.11169	0.880201	0.912121
Ribulose-5-Phosphate	Carbohydrates	229.02	230.019	[M-H]-	0.750961	1.06647	0.980382	1.21786	0.916431	0.832553	0.917973	1.25273	1.13362	1.30041	1.22851	1.13075	0.806338	1.14028	0.664014	0.516865	0.612537	0.375648	1.11299	0.74211	0.579685	0.413815	0.896507	0.605074	0.671395	1.21388	0.69246	0.467135	0.760078	0.518529	0.876365	0.366435	0.73103	0.874859	1.01667	1.1965	0.802198	0.421794	0.843421	0.716453	0.803601	0.676329	1.07662	0.635938	1.41378
Citramalate	Organic Acids	147	148.037	[M-H]-	0.324921	0.552114	0.476021	0.511375	0.350454	0.551321	0.675491	0.499853	0.712449	0.769576	0.646137	0.522185	0.65979	0.669269	0.690358	0.713385	0.616187	0.533837	0.5918	0.454172	0.497064	0.621766	0.666217	0.795191	0.849486	0.672138	0.572648	0.701795	0.635964	0.679491	0.686587	0.901178	0.589397	1.23971	0.760447	1.50674	1.36273	0.766222	1.48959	0.972141	1.10901	1.29459	1.28911	0.693499	1.36349
Acetyl Tryptophan	Amino Acid Derivatives	245	246.1	[M-H]-	0.00674781	0.00420255	0.00733355	0.0122325	0.0246771	0.0173975	0.00978065	0.0104994	0.0099966	0.00793926	0.00602992	0.00763814	0.0062528	0.00946144	0.0059868	0.00326549	0.010099	0.00582155	0.00531616	0.00794536	0.00390913	0.00611526	0.00700659	0.00715108	0.00481458	0.00622055	0.0126702	0.00323995	0.00708309	0.0222107	0.00522129	0.00448968	0.00507559	0.0806393	0.0819128	0.0212539	0.088307	0.0437352	0.0337325	38.8472	0.00896158	0.0740591	0.0632438	0.04278	2.54596
2-Deoxyribose 1-Phosphate	Carbohydrates	213.1	214.024	[M-H]-	1.2197	1.2243	1.31918	1.37595	1.39414	1.10836	1.45732	1.0028	1.0794	1.09804	1.11175	1.20974	1.15296	1.16085	1.10107	1.04505	1.25925	1.06559	1.08113	1.09034	1.12328	1.18927	1.21318	1.1555	1.2189	1.17034	1.33827	1.16304	0.948468	1.08164	0.961497	1.17673	1.28739	0.921962	1.03321	0.860546	1.03136	0.965671	1.10867	0.980466	0.939975	0.825348	0.636119	1.08222	0.840009
13-Hpotre(R)	Lipids_Fatty Acids	309.1	310.214	[M-H]-	1.05774	0.535008	1.32885	0.64817	0.494724	0.454706	0.285544	0.395338	0.151327	0.485148	0.438259	0.57507	0.643628	0.394302	0.643869	0.555561	0.605826	0.689516	1.69412	0.322862	0.491358	0.511381	0.422449	0.671715	0.854307	0.774884	0.390319	0.27857	0.274677	0.830734	0.427447	0.363482	0.878097	0.764932	0.892104	0.479171	0.456964	0.51626	0.334082	0.573489	0.666865	1.82598	0.611185	0.373059	1.04383
9-Hpotre	Lipids_Fatty Acids	309.1	310.214	[M-H]-	1.23764	2.94864	0.962939	2.22164	1.02414	2.20209	1.00019	0.874762	1.43703	0.677626	2.25652	1.72648	0.572804	1.04277	1.62174	1.03029	1.42853	1.30989	1.3221	1.01969	0.877169	0.461882	2.20188	1.09474	1.61319	0.640352	1.18215	0.941823	0.411875	1.02075	1.74695	0.960999	1.30241	0.887999	0.87167	1.4681	0.58998	0.909029	1.3233	1.53337	2.29206	1.28861	1.12254	1.86825	1.5533
N-Acetylglucosamine 1-Phosphate	Others	300.1	301.056	[M-H]-	0.393692	0.881884	0.611193	0.701319	0.776413	0.439783	0.558473	0.365235	0.53462	0.687487	0.516689	0.52905	0.457088	0.506042	0.421902	0.486246	0.512917	0.357353	0.537902	0.806962	0.657422	0.824231	0.554014	0.471047	0.762855	0.938546	0.464792	0.547667	0.681353	0.662143	0.542602	0.595286	0.642926	1.48014	1.07428	0.661022	1.3056	0.659735	0.649981	0.549159	0.838987	1.07636	1.68597	1.04854	1.02053
3-O-P-Coumaroyl Quinic Acid	Quinate And Its Derivatives	337.1	338.1	[M-H]-	0.635307	0.987318	0.392707	1.36405	1.38922	0.820922	0.227167	0.307196	0.809066	0.288897	0.458121	0.249872	0.260497	0.335731	0.229117	0.769333	0.33693	0.213632	0.477716	0.956947	0.155939	0.359121	0.445184	0.251298	0.163269	0.373109	0.269913	0.502735	0.681973	1.01396	0.375073	0.116917	0.882689	0.517911	2.58414	0.122768	0.140651	0.0754054	0.894043	0.204409	1.55738	0.437635	1.12766	1.37759	0.790227
3-(2-Naphthyl)-D-Alanine	Amino Acid Derivatives	214.1	-	[M-H]-	1.33582	2.93498	1.41232	2.32987	0.506197	1.0835	0.782807	0.520684	2.45004	1.03668	1.18437	3.19814	2.26741	2.15079	1.80276	1.96444	0.95212	1.08622	1.69831	1.533	2.67769	1.59638	0.932434	2.55053	2.80349	0.942898	1.08264	3.04795	1.02373	1.22855	1.79606	1.44981	0.867427	0.768665	0.559438	0.590537	0.847049	1.44478	0.633233	0.475551	0.446463	0.690416	2.178	0.502569	0.752753
9,10-Eode	Lipids_Fatty Acids	295	296.235	[M-H]-	0.308812	0.573368	0.965965	0.704915	0.448744	0.317998	0.643304	0.407656	0.376376	0.550798	0.524487	0.507661	0.567566	0.576997	0.383139	0.546649	0.279066	0.546137	0.8078	0.230915	0.393283	0.330312	0.310114	0.569476	0.426614	1.72846	0.326149	1.09787	0.372642	0.602586	0.875946	0.524329	0.713104	0.977	0.372093	2.96988	1.54322	0.42456	1.13859	1.81364	0.449173	2.5617	0.878409	0.411055	2.04089
12,13-Eode	Lipids_Fatty Acids	295	296.235	[M-H]-	0.591564	0.590905	0.970079	0.380155	0.394843	0.323937	0.425637	0.585598	0.328908	0.340726	0.877131	0.439588	0.240011	1.07098	0.383042	0.700488	0.514566	0.331102	1.547	0.401404	0.513977	0.605523	0.719473	0.655887	0.498175	3.7885	0.738877	0.398691	0.25126	0.455313	2.49401	0.910584	0.791701	3.32294	0.390344	2.05292	0.285874	0.518656	0.599077	0.899059	0.342697	5.36777	3.27601	0.505083	0.93841
Indolelactic acid	Organoheterocyclic compounds	204.074	205.074	[M-H]-	0.750966	1.08936	0.728984	0.510147	0.60732	0.631262	0.649528	0.611159	0.622219	0.530717	0.586002	0.631363	0.463385	0.432752	0.70999	0.364355	0.996088	0.477619	0.313161	0.262193	0.317593	0.456973	0.369435	0.679691	0.391815	0.581495	0.476882	0.585094	0.374246	0.536154	0.650542	0.402115	0.339532	2.47057	1.40445	1.33044	1.64999	0.66362	2.04185	1.38348	1.15958	1.96945	1.7676	1.61599	1.98464
Estrone	Steroids and steroid derivatives	269.162	270.162	[M-H]-	0.0690213	0.127871	0.20868	0.19677	0.202065	0.121498	0.070536	0.132675	0.0438752	0.11624	0.178628	0.145033	0.547002	0.218406	0.175964	0.0891517	0.356024	0.368552	0.149236	0.110707	0.134877	0.206199	0.121425	0.145066	0.120002	0.178311	0.166148	0.0590107	0.106655	0.0975248	0.0178742	0.106907	0.341408	0.25682	0.728956	1.31236	4.39414	5.65485	0.52972	1.06738	0.148009	0.589732	0.575323	0.222398	2.11244
Mefenamic acid	Benzenoids	240.11	241.11	[M-H]-	1.59391	1.14964	1.30962	1.11367	1.04135	1.0269	1.60323	1.08226	0.949421	0.787975	0.902972	1.12375	0.838604	1.37435	1.07008	0.715872	0.890856	1.01681	0.783836	1.27763	0.942189	1.3269	1.01721	1.10873	0.967763	0.742753	0.972326	0.914078	0.961994	1.11039	1.13197	1.05307	0.768006	0.697581	1.10559	1.24593	1.39838	1.01064	1.23954	1.26518	0.83423	0.654475	0.809245	0.766679	1.12715
(3-Methoxy-4-hydroxyphenyl)ethylene glycol sulfate	Organic acids and derivatives	263.03	264.03	[M-H]-	0.102222	0.261021	0.121657	0.125127	0.120275	0.0528942	0.0554153	0.244198	0.148264	0.0797099	0.220481	0.097435	0.174483	0.169705	0.1308	0.0694976	0.139087	0.242364	0.14407	0.0799084	0.0951772	0.138026	0.0775137	0.229686	0.142665	0.0612031	0.147675	0.074113	0.221984	0.200115	0.134653	0.142155	0.112077	1.00002	2.64368	0.719735	4.49246	4.80617	0.425291	0.264558	0.480719	0.288895	2.45147	0.377094	5.67651
Pimelic acid	Organic acids and derivatives	159.074	160.074	[M-H]-	0.143774	0.167165	0.135914	0.111113	0.193641	0.121659	0.219994	0.123886	0.131653	0.235864	0.106914	0.157495	0.219807	0.136498	0.177694	0.178878	0.122983	0.14347	0.129868	0.137543	0.12119	0.159377	0.150577	0.141359	0.172303	0.131603	0.127894	0.0842917	0.118266	0.178201	0.19963	0.125577	0.138485	2.21157	0.735458	0.483367	1.20593	2.05981	1.68777	0.415052	0.177771	1.54167	1.51972	0.299101	1.59818
(-)-Naringenin	Flavonoids	271.068	272.068	[M-H]-	1.72092	0.7575	0.73684	0.423358	1.06592	1.12514	0.825593	1.6417	2.1304	0.979	1.69496	1.00564	0.909499	0.820102	0.941785	1.41153	1.22039	1.1369	1.05713	0.909385	1.45235	1.38476	1.40401	0.89105	1.1291	1.71404	0.823506	0.762185	0.79317	2.52095	1.14646	0.902879	0.82469	2.03572	7.26625	1.00326	0.448074	0.868448	1.35836	2.60055	1.18491	4.27589	1.92454	2.5929	1.11783
Xanthosine	Nucleotide And Its Derivates	283.076	284.076	[M-H]-	0.103936	0.187262	0.148875	0.148867	0.119412	0.150028	0.644276	0.162092	0.154486	0.199924	0.201054	0.0861652	0.17215	0.15374	0.147944	0.139619	0.0929381	0.112094	0.0796433	0.120169	0.0982592	0.123376	0.117497	0.125229	0.0796718	0.103657	0.0807178	0.12516	0.10615	0.142563	0.145124	0.129719	0.105669	0.858562	0.275647	1.39737	0.58658	0.328624	3.3391	0.313806	0.39684	0.228277	0.856671	0.312877	0.511657
estrone 3-sulfate	Steroids and steroid derivatives	349.119	350.119	[M-H]-	1.12583	1.28521	0.180927	0.134864	0.0362157	0.0676025	0.0436327	0.0693049	1.49748	0.211172	1.33117	0.0621397	0.338005	0.0910631	0.138054	2.27445	0.623853	0.161508	0.952237	0.384226	0.0409141	0.0963487	0.0916122	0.367797	0.0839717	9.36339	0.173642	0.0145398	0.018252	0.0456581	5.84522	0.174639	0.0471001	6.52118	0.394465	0.192936	0.831684	0.381029	0.0799529	0.0310921	0.179778	1.66476	12.4491	0.197473	0.245422
3-Hydroxy-4-methoxyphenylacetic acid	Benzenoids	181.058	182.058	[M-H]-	0.24233	0.544367	0.383449	0.173403	0.49895	0.238083	0.462665	0.369142	0.26329	0.28302	0.28331	0.466464	0.570913	0.500692	0.382857	0.317744	0.286167	0.285519	0.646284	0.32504	0.304058	0.480769	0.638788	0.247382	0.254499	0.354749	0.500632	0.360806	0.372138	0.46298	0.50734	0.402726	0.368851	0.704048	1.57842	0.594806	1.43363	0.941305	1.04116	0.749708	0.835384	0.929229	1.65674	0.735532	0.944342
3-Methyladipic acid	Lipids and lipid-like molecules	159.074	160.074	[M-H]-	0.103161	0.116277	0.0803508	0.118585	0.198578	0.0820634	0.146768	0.0823811	0.0941772	0.189725	0.0911739	0.107674	0.210541	0.096998	0.135804	0.0964528	0.0572593	0.104268	0.109736	0.117576	0.0943661	0.139798	0.0972511	0.0899162	0.125308	0.0689139	0.0932753	0.0477826	0.0563426	0.145447	0.147922	0.0821195	0.0825657	2.00256	0.714594	0.514713	1.25318	1.97947	1.90117	0.445966	0.180247	1.52535	1.44814	0.275195	1.50576
3-Methylglutaric acid	Lipids and lipid-like molecules	145.058	146.058	[M-H]-	0.268846	0.384444	0.432819	0.193002	0.417031	0.2803	0.452126	0.125656	0.391624	0.248332	0.224091	0.340764	0.347421	0.290848	0.466804	0.437531	0.404516	0.326993	0.535967	0.384311	0.228321	0.211178	0.263938	0.344394	0.714538	0.464553	0.347368	0.348237	0.412878	0.591899	0.673946	0.460402	0.271249	1.17199	0.711483	1.52356	0.798586	2.20449	0.71096	0.935292	0.312192	0.617852	0.651144	0.309545	1.59974
2,6-Dimethylaniline	Benzene And Derivatives	122.1	121	[M+H]+	0.604184	0.884511	0.935554	0.673129	0.814778	0.699926	0.782526	0.700867	0.675584	0.944495	0.891689	0.831706	0.818368	0.77131	0.777824	0.864777	0.744004	0.878218	0.723939	0.657352	0.696497	0.594243	0.647148	0.642383	0.806885	0.672472	0.684603	0.97318	0.686964	0.850035	1.07785	0.799572	0.738372	1.32552	1.05692	1.18581	1.5937	0.650336	1.07475	0.977996	0.813874	1.21564	1.20304	0.686387	1.32534
p-cresol	Benzenoids	107.058	108.058	[M-H]-	0.314431	0.885292	0.0101771	0.586092	0.333854	0.132935	0.232224	0.0974642	0.0563319	0.205777	0.430101	1.25646	0.228501	0.222623	0.052144	0.158288	0.67028	0.91031	0.221343	0.398447	0.890636	0.519027	1.26903	0.243385	0.67639	0.194088	0.997564	0.682876	0.104397	0.458386	0.0892256	0.17023	0.763743	0.142281	1.13315	0.246257	1.57752	2.58335	0.777471	0.685753	1.59508	0.426853	1.91911	0.302921	1.14621
2-Phenylbutyric acid	others	163.084	164.084	[M-H]-	0.931149	4.78188	0.841907	0.258828	0.852614	0.717952	0.93339	0.824834	0.709756	0.594649	0.693935	0.59854	0.869326	0.748594	1.09596	0.853833	0.588735	0.392168	0.808867	0.659357	0.593912	0.260996	0.599681	0.687348	0.425251	0.382398	0.762695	0.714829	0.663132	0.614954	0.730299	0.698957	0.905399	2.98571	5.60903	0.515644	1.60492	0.768082	0.992376	0.31875	0.877319	1.31334	1.49381	1.47295	0.679975
Indoleacrylic acid	Organoheterocyclic compounds	186.063	187.063	[M-H]-	1.51611	0.399454	0.418894	2.29216	0.575237	4.64243	0.676401	0.257481	0.321478	1.36339	0.582004	2.05616	1.93541	0.774796	0.4429	0.569616	2.72837	0.400691	0.301124	2.11636	0.814285	0.643815	3.22265	0.532576	2.24061	1.91367	2.43091	1.62109	2.50205	0.270523	0.246033	3.14524	0.887417	1.25767	1.77391	1.03342	0.175126	0.38466	0.964984	0.248047	1.08929	0.599257	0.635449	0.382334	0.348229
Xanthurenic acid	Organoheterocyclic compounds	204.037	205.038	[M-H]-	0.932209	1.36208	1.0822	0.909704	1.01063	1.09876	0.98062	0.915614	0.830308	0.919168	1.01923	1.04877	0.843097	0.873788	0.914151	0.771352	0.990909	0.792201	0.88947	0.849451	0.714306	0.794135	0.95857	0.970359	0.764157	0.947826	1.14095	1.19825	0.830475	1.06661	1.1428	1.07748	0.789772	0.914146	0.985973	0.827793	0.609034	0.701017	0.54839	1.02375	0.919909	1.1108	3.27667	1.5275	1.77073
2-Methylbenzoic acid	Benzenoids	135.052	136.052	[M-H]-	0.241161	0.375823	0.413016	0.224545	0.270697	0.283561	0.389036	0.221595	0.309086	0.391651	0.350647	0.251699	0.322034	0.329741	0.281207	0.266034	0.232228	0.338771	0.35604	0.202297	0.231196	0.376213	0.291089	0.315488	0.276657	0.36493	0.249133	0.247748	0.242867	0.265129	0.332953	0.267121	0.239118	2.59725	0.834828	2.44794	0.387988	0.871219	0.826795	1.81071	1.88368	0.681568	0.934861	0.99989	1.66056
Hydroxyphenyllactic acid	Phenylpropanoids and polyketides	181.058	182.058	[M-H]-	0.630373	1.56034	0.98001	0.699021	0.939844	0.883298	0.790653	0.698375	0.526301	0.575096	0.939228	0.829438	0.491693	0.360398	0.632369	0.419744	0.849478	0.486788	0.362913	0.272664	0.418167	0.458577	0.437223	0.74134	0.506579	0.904682	0.425582	0.278908	0.498473	0.603318	0.732023	0.604125	0.429377	0.880327	2.01064	1.27724	3.80211	1.67787	0.901646	0.723601	1.02549	1.20095	1.66469	1.2681	1.14668
3-PRENYL-4-HYDROXYACETOPHENONE	Organic oxygen compounds	203.115	204.115	[M-H]-	0.59445	0.345037	0.248777	0.781499	0.512098	0.397213	0.7034	0.851461	0.757558	0.476337	0.860351	0.489	0.402009	0.725173	1.21392	0.373892	0.350287	0.244052	0.602675	0.558833	0.175017	0.672607	0.316682	0.523108	0.427765	0.2594	0.551834	0.338718	0.752338	0.458746	0.342518	0.682537	0.425655	2.06823	1.43561	0.761685	10.1398	4.70601	1.14049	0.831544	1.82535	0.946768	1.25417	0.458632	2.78233
MARMESIN	Phenylpropanoids and polyketides	245.089	246.089	[M-H]-	0.488064	3.14224	0.309406	1.7049	0.527889	0.535951	0.530032	0.450889	0.308905	0.326706	0.603016	0.533717	0.663965	0.330888	0.343081	0.928694	0.494743	0.706345	0.668765	0.426378	0.569683	0.684554	0.414955	0.748366	0.50769	0.57258	0.8699	0.641437	0.389268	0.600154	1.75556	0.407761	2.90328	3.34979	1.48219	0.487457	0.970831	1.72909	1.1787	0.494962	1.22151	2.55666	2.28953	0.506623	0.4319
DL-Benzylsuccinic acid	Lipids_Fatty Acids	207.074	208.074	[M-H]-	1.33912	1.81586	1.24572	1.45763	1.82526	0.977236	1.19627	1.47462	0.887679	1.19022	1.45886	1.03956	0.743096	1.97104	1.20433	0.941569	0.892599	0.944228	3.01862	0.950455	0.956281	1.6249	0.51907	2.44768	1.10938	1.03209	2.04118	0.782952	1.63904	1.49735	3.12224	2.96565	0.823383	0.374887	0.926	2.18421	2.7327	1.133	1.11951	0.866418	0.847701	0.405533	0.681003	0.787325	0.472114
CMPF	Lipids_Fatty Acids	239.1	240.1	[M-H]-	0.41147	0.850522	1.05051	0.614538	1.96261	1.4812	0.170017	1.56403	0.566768	0.650334	0.931155	0.547682	1.1483	1.46581	1.75232	0.891896	0.422539	0.895339	0.696404	0.697982	0.636678	0.9734	0.893832	0.353567	0.339439	0.121661	0.784144	0.229401	0.592966	0.515947	1.80708	0.503956	0.265619	0.134605	0.348278	0.107069	0.133744	0.583189	1.61359	0.141432	0.796911	0.88387	0.901223	1.34397	0.594092
cis-7-Hexadecenoic Acid	Lipids_Fatty Acids	253.225	254.225	[M-H]-	0.569622	0.710321	1.21882	0.99403	1.13777	1.12511	0.651537	0.867526	0.464761	0.717636	1.09829	0.896173	1.10601	0.859055	0.873081	1.05629	0.599349	0.717007	1.60452	0.4103	0.787145	0.607376	0.974593	1.11458	1.04991	0.644133	1.13644	1.50554	0.926816	0.876346	0.937276	1.29537	1.2663	0.249197	0.287043	1.66572	0.473463	1.09625	0.896874	1.38214	1.01264	0.531264	0.516341	0.460114	0.806806
o-Cresol	Benzenoids	107.058	108.058	[M-H]-	0.160998	0.474502	0.216254	0.307376	0.262717	0.122896	0.362797	0.0843903	0.0964594	0.30878	0.371292	0.946636	0.222206	0.231694	0.037837	0.131928	0.55402	0.784749	0.308518	0.455813	1.07035	0.587143	1.33261	0.333036	0.736377	0.210576	0.952543	0.762097	0.113352	0.599511	0.0734519	0.196244	0.879526	0.119421	1.02257	0.171492	1.27527	4.22756	0.457381	0.386376	1.74356	0.282839	2.38136	0.208305	1.0687
2-Methylguanosine	Nucleotide And Its Derivates	296.107	297.107	[M-H]-	0.56885	0.972529	0.792279	0.740405	0.639588	0.722481	0.558045	0.728913	0.6872	0.653993	0.683805	0.71379	0.561415	0.701131	0.542962	0.637715	0.570981	0.661175	0.712007	0.754092	0.734762	0.724852	0.700329	1.03018	0.860371	0.585098	0.880014	0.7141	0.928273	0.640239	1.12934	0.763013	0.934863	1.17904	1.34477	1.39116	2.22906	1.27139	1.10143	0.868471	0.847609	0.600896	1.24439	1.01573	1.01282
DL-o-Tyrosine	Organic acids and derivatives	180.074	181.074	[M-H]-	1.08982	2.0299	1.38566	1.41176	1.64426	1.36643	1.57902	0.986643	1.24395	1.26675	1.19238	1.07899	1.14393	0.900555	1.14226	1.10391	1.1464	1.06074	0.953658	1.18566	1.17988	1.02992	1.12691	1.31019	1.20407	1.50925	0.989218	0.957018	1.18043	1.66638	1.56934	1.59218	1.34017	0.748768	1.21221	1.06623	0.682585	0.900118	0.651885	0.948188	0.887249	1.08676	0.951521	0.794146	0.841413
L-Erythrulose	Carbohydrates	119.042	120.042	[M-H]-	0.141277	0.315984	0.271738	0.126584	0.204038	0.569167	0.513635	0.136838	0.262342	0.32087	0.188122	0.248215	0.260951	0.440628	0.349469	0.290259	0.189123	0.343302	0.69594	0.163477	0.281322	0.297618	0.478741	0.239779	0.606678	0.331895	0.232619	0.344854	0.347183	0.269527	0.373761	0.342231	0.353088	1.72071	2.63137	1.66393	1.96233	2.23817	7.6921	1.36603	2.01325	1.14257	2.1828	1.14801	2.41883
3-Methoxybenzenepropanoic acid	Phenylpropanoids and polyketides	179.079	180.079	[M-H]-	0.73381	0.771588	0.705633	1.32277	0.897379	0.700069	0.761063	0.663944	0.917099	0.980616	0.700761	0.472491	0.795702	0.827388	0.687547	0.399992	0.659819	0.728606	1.17234	1.93827	0.89446	0.905339	2.20024	0.933899	1.13628	0.812012	1.07608	0.862348	1.08154	1.01644	0.882512	0.779677	0.904654	0.983098	0.873321	1.10805	0.78492	0.718153	1.03571	0.896918	1.89776	1.10101	0.982668	0.879099	0.989988
cis-4-Hydroxy-D-proline	Organic acids and derivatives	130.058	131.058	[M-H]-	1.146	1.68933	1.4832	1.17678	1.26096	1.28573	1.4136	1.16952	1.11904	0.93631	1.12156	1.26283	1.18033	0.944561	0.783825	1.33392	0.888156	0.945031	0.861045	1.13994	0.974888	0.782575	1.17296	0.894524	0.932373	0.993119	0.903662	1.1073	0.962326	1.21182	1.46532	1.07449	0.801865	1.14672	0.857366	1.23504	1.24054	0.65669	0.745484	1.04877	0.957258	1.35192	0.981691	0.677515	1.04768
7-Methylguanosine	Nucleotide And Its Derivates	296.107	298.115	[M-H]-	0.66543	0.850666	0.586136	0.701894	0.692162	0.643804	0.610304	0.806381	0.596835	0.655466	0.825303	0.66899	0.613985	0.706055	0.574461	0.626324	0.395175	0.60443	0.606222	0.649414	0.569149	0.727943	0.735339	0.770565	0.656809	0.52337	0.655977	0.536166	0.631148	0.514038	0.811988	0.652024	0.713896	1.03756	1.20528	1.21111	2.08713	0.94979	0.834702	0.749354	0.673569	0.592673	1.28071	1.08874	1.0397
Acetyl-DL-Valine	Organic acids and derivatives	158.089	159.09	[M-H]-	0.360516	0.525829	0.423182	0.377139	0.494265	0.39298	0.413624	0.392691	0.371854	0.469732	0.395529	0.48876	0.442475	0.4228	0.408173	0.318009	0.409272	0.465555	0.349305	0.597753	0.367736	0.428748	0.511849	0.460176	0.495308	0.393161	0.522844	0.371029	0.467384	0.415054	0.478212	0.404713	0.451064	1.64719	1.62913	1.31494	3.29409	1.53886	1.50692	0.634761	0.808952	1.06545	1.88847	0.800637	3.95089
Nelarabine	Nucleotide And Its Derivates	296.107	297.107	[M-H]-	0.632955	1.10259	0.973549	0.793016	1.04025	0.625105	0.907655	0.955988	0.68236	0.87762	0.961464	0.663546	0.78695	0.808975	0.755781	0.523153	0.636846	0.929954	0.560963	0.525142	0.727076	0.700928	0.603716	1.10811	0.830941	0.675754	0.769994	0.70125	0.678171	0.650031	0.967834	0.637081	0.683956	0.944787	1.3424	1.26212	2.34124	1.06937	1.10624	0.933458	0.822005	0.637218	1.1763	0.820206	1.00339
N-lactoyl-phenylalanine	Organic acids and derivatives	236.1	237.1	[M-H]-	0.222372	0.595238	0.297709	0.184542	0.294369	0.260181	0.370776	0.217084	0.295044	0.337741	0.30645	0.30586	0.294979	0.262361	0.238022	0.316812	0.21625	0.223365	0.205865	0.132992	0.151551	0.155101	0.268764	0.248566	0.222527	0.331238	0.216936	0.192127	0.191711	0.315106	0.785545	0.233787	0.255027	1.88764	2.18523	3.07871	3.46744	0.610307	1.41615	0.612182	0.666346	2.98145	4.17965	0.740514	2.15945
KAEMPFEROL-7-O-GLUCOSIDE	others	447.101	448.101	[M-H]-	0.363321	0.062773	0.0249642	0.188164	0.0360323	0.102152	0.0662647	0.577974	1.59946	0.0504904	0.433354	0.0329687	0.0574512	0.159767	0.468075	0.434762	0.0705657	0.0298938	0.15957	0.0849907	0.0348685	0.0749592	0.0818771	0.435919	0.149739	0.370168	0.0721843	0.192026	0.162062	0.0610943	0.186268	0.0338418	0.365797	0.535164	29.6997	0.10072	1.00969	0.353857	0.276266	0.875171	0.485792	10.9762	4.00327	0.205496	2.05505
Ractopamine	others	300.168	301.168	[M-H]-	0.106477	0.0909987	0.093587	0.0964874	0.0786485	0.0984353	0.779037	0.278241	0.248366	0.119871	0.0887557	0.0860021	0.0881551	0.103618	0.103357	0.0642811	0.113752	0.171995	0.106209	0.120498	0.109824	0.109337	0.105655	0.0935618	0.0757208	0.144096	0.0979042	0.161279	0.111937	0.106657	0.256577	0.100682	0.113152	0.951158	1.21952	0.427472	2.62859	2.68268	0.80366	0.336659	0.204414	0.237954	1.67359	0.166145	1.54212
Lactic acid	Organic Acid And Its Derivatives	89.0317	90.0317	[M-H]-	0.21657	0.267237	0.228609	0.327033	0.195492	0.362234	0.36341	0.655594	1.25732	0.67238	0.838084	0.561538	0.518661	0.358189	0.573764	0.716964	0.582099	0.356016	0.451761	0.334924	0.412399	0.465088	0.596108	0.366456	0.481808	0.55493	0.404271	0.508479	0.397881	0.45173	0.568447	0.461904	0.401595	1.62806	0.636449	1.92942	1.69115	0.963746	1.19554	1.12615	1.52594	2.19969	1.49891	0.984535	1.89394
Isocitrate	Organic acids and derivatives	191.027	192.027	[M-H]-	1.10445	1.35257	1.174	0.949902	1.22864	0.8504	0.868657	0.99223	0.609031	0.6745	0.912023	0.964418	1.0393	0.948555	0.955901	0.89353	1.17193	1.3982	1.03925	0.686462	0.668981	0.854778	0.929762	1.33313	1.47982	1.08987	1.37261	1.08277	1.10685	1.33421	0.820601	1.38132	1.60533	0.664218	0.537414	0.714388	0.298472	1.29078	0.73321	0.829038	1.14649	1.03785	1.09347	1.34378	1.10808
13(S)-HOTrE	Lipids_Fatty Acids	293.219	294.219	[M-H]-	0.885441	1.01468	0.613133	0.732972	0.645111	1.17059	0.780891	1.5395	1.55338	0.924866	0.566486	0.360608	0.507853	0.738417	0.94508	0.645994	0.691913	1.98529	1.05934	1.20644	0.606332	1.03831	1.18863	1.33126	0.873324	1.4064	1.50823	1.05559	0.800882	1.15933	0.768722	1.15511	1.08868	1.48466	0.936659	0.807528	1.66817	1.30746	0.884588	0.69201	1.05062	1.52637	0.50558	0.985648	1.82987
N-Acetylalanine	Organic acids and derivatives	130.05	131.058	[M-H]-	0.325017	0.59303	0.518834	0.415783	0.561111	0.42521	0.484947	0.511803	0.553746	0.642371	0.543204	0.608783	0.516463	0.530004	0.458787	0.498188	0.444597	0.561205	0.400545	0.641876	0.340276	0.528724	0.648069	0.553509	0.627456	0.43943	0.523376	0.553547	0.446902	0.494761	0.469742	0.471279	0.461181	1.54003	1.42088	0.947895	2.87895	1.88165	1.55009	0.641624	1.00782	1.03835	2.01526	1.2023	3.08736
N-Acetylvaline	Organic acids and derivatives	158.082	159.089	[M-H]-	0.206801	0.280075	0.417134	0.222618	0.256099	0.19586	1.16105	0.426951	0.203424	0.231902	0.653798	0.388511	0.294187	0.215741	0.697343	0.220363	0.282136	0.346793	0.395453	0.343205	0.292606	0.327118	0.139632	0.354105	0.378727	0.372512	0.45455	0.488852	0.445508	0.325397	1.05652	0.406247	0.52418	2.52628	3.00777	0.291106	3.44251	4.95537	0.613772	2.16727	0.429509	0.736778	2.5755	0.458317	2.57058
Glycerol 3-phosphate	Lipids and lipid-like molecules	171.006	172.014	[M-H]-	1.70847	2.62049	2.66392	1.31494	1.01534	1.08506	1.56005	1.37739	0.620127	0.647542	1.75295	0.755174	0.832743	1.50386	1.17719	1.61728	1.82847	1.20355	1.84755	0.765452	0.967666	0.831102	0.739774	0.835973	0.865271	1.81006	2.7066	2.50793	1.76053	2.059	1.85601	1.35099	2.09829	0.479774	0.393401	1.20938	0.096796	0.526088	0.773085	0.601318	1.09031	1.08224	0.175971	1.02144	0.650786
Cyclamic acid	Organic acids and derivatives	178.053	179.062	[M-H]-	0.00203557	0.0571011	0.032766	0.00162543	0.116106	0.0110499	0.416646	0.0197127	0.128872	0.31186	0.0205179	0.0153177	0.0302121	0.0383555	0.0355494	0.00553049	0.0111398	0.0643343	0.238756	0.680062	0.0199247	0.0050231	0.015628	0.0766308	0.00332715	0.00206943	0.00683075	0.0336563	0.022815	0.0888372	0.214988	0.0939346	0.40893	8.56464	0.107624	0.0304051	0.118659	3.08888	0.68387	0.016385	0.00447196	0.0610414	0.313475	0.028071	0.0162113
L-Lysine	Amino Acid	147	146.106	[M+H]+	1.15796	1.5324	1.55925	1.0655	1.7443	1.60479	1.29087	1.10994	1.03516	1.31003	1.18049	1.40152	1.13176	1.28469	1.02409	0.937352	0.636848	1.01555	1.01539	1.26826	0.98835	0.744684	1.0092	1.01098	0.797105	0.891457	0.831642	1.05434	0.941557	1.1684	1.08921	0.948777	0.809743	0.839553	0.736795	0.62796	0.524052	0.599715	0.695847	0.891462	1.17825	0.800156	0.982168	0.721439	0.716507
Ethyl myristate	Organic Acid And Its Derivatives	255.232	256.24	[M-H]-	1.36906	1.65665	1.62532	1.66925	1.80961	1.8116	0.121776	0.961211	1.35935	1.23553	1.17279	1.33776	1.29398	1.18843	1.12658	1.15965	1.0636	1.14668	1.21124	0.921358	1.11829	1.02663	1.15333	1.14201	1.19476	1.12067	1.18298	1.13577	0.984855	1.16895	1.16022	1.12119	1.08363	1.13668	0.95393	1.39978	1.29542	1.14086	1.06466	1.12759	1.19226	1.10779	1.051	0.607724	0.925865
1,4-Dihydro-1-Methyl-4-Oxo-3-Pyridinecarboxamide	Pyridines And Derivatives	153.06	152.059	[M+H]+	0.306609	0.285384	0.225487	0.223972	0.385958	0.116275	0.26768	0.244538	0.162239	0.455234	0.481378	0.447458	0.218613	0.369445	0.179054	0.21551	0.182488	0.682022	0.160223	0.408184	0.310753	0.191097	0.257574	0.412821	0.0983576	0.116376	0.427438	0.321707	0.311109	0.273395	0.229524	0.335624	0.107993	1.26132	2.36364	1.12285	3.34142	1.3883	1.90526	1.52379	0.553193	0.706425	2.56041	0.68558	6.69658
2-Picolinic Acid	Pyridine And Its Derivatives	124.03	123.032	[M+H]+	1.02417	1.37207	0.999229	0.902714	0.966901	1.65662	0.772406	1.64297	1.85818	1.0055	1.11339	1.2069	1.15769	1.003	1.73419	1.34762	1.7435	1.43663	1.31797	1.2474	1.44364	1.00697	1.21962	0.7648	0.939412	0.91645	1.00202	0.92455	0.904587	1.08808	0.54748	1.03677	0.8836	0.810352	0.89684	0.763976	0.955651	1.084	0.559951	0.629099	0.837126	0.885001	1.04043	0.570417	2.1034
3-Carbamyl-1-Methylpyridinium Chloride (1-Methylnicotinamide Chloride)	Pyridine And Its Derivatives	138.07	172.04	[M+H]+	0.171784	0.217027	0.272879	0.240536	0.176342	0.294682	0.349958	0.194038	0.252391	0.353532	0.237616	0.213442	0.268426	0.30863	0.208222	0.189274	0.250773	0.287287	0.320235	0.169029	0.267755	0.283168	0.243618	0.268083	0.2454	0.288685	0.220981	0.262867	0.219282	0.179433	0.221716	0.230596	0.211022	2.26037	0.859389	1.82896	0.464119	0.850857	0.825497	1.13615	1.66331	0.460701	0.885104	0.962633	1.40544
4-Pyridoxic Acid	Pyridines And Its Derivatives	184.05	183.053	[M+H]+	0.089492	0.191244	0.13345	0.196688	0.202471	0.095794	0.091343	0.137151	0.099042	0.186081	0.0993093	0.133496	0.122735	0.117337	0.159546	0.109989	0.127177	0.429314	0.123057	0.100982	0.0982568	0.101837	0.0784491	0.13555	0.0653305	0.0385812	0.0929404	0.0929191	0.144386	0.132409	0.127231	0.0996441	0.0850799	0.932376	1.51477	0.456967	1.54248	8.25321	0.621215	0.277248	0.399805	0.510845	1.00118	0.332492	7.40785
L-Ornithine	Amino Acid	133	168.067	[M+H]+	2.08738	1.06921	1.92552	1.55241	2.39938	1.60576	1.74174	1.80558	1.97171	2.35998	2.43388	2.08077	1.96511	2.19204	3.05665	3.1585	3.22115	1.79803	1.98846	1.78194	1.82083	1.96665	1.80163	1.85832	1.62174	1.41839	2.07526	12.7245	10.9111	11.1383	5.60519	6.51753	2.43659	1.33366	1.08286	0.834493	1.29968	0.800767	1.12638	0.849785	0.773617	0.885021	1.79658	0.635368	0.89265
Theophylline	Pyridine And Its Derivatives	181	180	[M+H]+	0.110239	1.19968	4.24702	0.271128	1.44544	1.41	5.48706	3.5041	0.083135	6.37175	3.60525	0.00960785	4.5563	0.0111277	0.0132144	1.89948	2.25403	6.06842	0.0059761	0.0229031	2.87042	2.30634	0.351061	0.404827	5.44552	0.518995	1.191	6.41439	0.00597331	0.0898507	0.00892242	0.0115012	0.00475805	0.0469649	0.0344214	0.0171966	0.175075	1.23212	0.0199419	0.0166145	0.0336317	0.297525	0.139854	0.0136462	0.335007
Picolinamide	Pyridines And Derivatives	123.1	122.1	[M+H]+	0.346182	1.08769	0.29399	0.512723	0.616362	0.805995	0.669706	0.472774	0.301041	0.82499	0.651976	0.691936	0.462574	0.446019	0.378277	0.441629	0.653308	0.374842	0.459545	0.3252	0.44563	0.365588	0.693636	0.314636	0.27844	0.333681	0.260335	0.598803	0.367715	0.501703	0.471199	0.314835	0.345921	1.74527	0.978721	3.36405	0.459126	0.912432	1.55536	1.062	0.800446	1.39036	1.16211	1.09994	1.42505
Acetylcholine Chloride	Cholines	147.12	181.087	[M+H]+	1.47046	1.06517	1.42766	2.33326	2.19663	0.703933	1.24695	1.07986	0.328859	0.827508	0.573362	0.56445	0.48066	0.699089	0.421815	0.331466	0.423028	0.596613	0.260929	0.450054	0.568365	0.504025	0.550684	0.467729	0.923714	0.462924	0.953863	0.168878	0.910951	0.306539	0.724746	0.744613	0.637772	1.89375	1.41419	2.14688	1.22489	1.05977	0.581205	0.385467	0.651254	0.372158	2.31284	1.60934	0.795346
Choline	Choline	105.11	104.108	[M+H]+	0.829976	1.18607	1.2398	0.909699	0.805348	0.778695	0.751552	0.716548	0.745997	0.669649	1.07454	0.958865	1.10065	1.18502	1.09111	1.34689	1.16842	1.18401	1.37097	0.815095	0.787653	0.724324	0.883454	0.956671	0.734642	1.11756	1.0679	1.56653	0.989019	1.15493	1.1835	1.06038	1.17509	1.39953	0.733141	1.328	1.12735	0.74178	0.833868	0.674721	0.901289	0.757139	0.804792	0.625434	0.924206
Putrescine	Polyamine	89	88.1	[M+H]+	0.379792	0.503753	0.464824	0.449389	0.450492	0.524472	0.620178	0.702393	0.644	1.01076	0.809546	0.649083	1.03366	0.666173	0.939304	0.616701	0.494769	0.682467	0.561219	1.10456	0.81409	0.738419	0.65334	0.649357	0.713772	0.897993	0.737756	0.912271	0.820614	1.41147	1.29367	1.15113	0.750048	1.18943	1.10491	1.14428	1.21018	0.811667	1.40485	0.845198	0.790224	0.67156	0.721535	0.904166	0.898811
L-Alanine	Amino Acid	90.048	89.048	[M+H]+	4.19667	4.28673	5.15426	4.29173	5.69038	3.14749	2.70494	0.935575	1.11196	1.22891	1.10693	1.07376	1.03492	1.13849	0.953198	1.39248	1.43106	1.23204	1.15513	1.17471	1.38182	0.858741	1.53051	1.24456	1.25714	1.43572	1.02064	1.14243	0.96109	1.53173	1.2371	1.30533	1.1935	0.729615	1.33196	0.146207	0.167087	0.971998	0.741429	0.927087	1.17727	0.115007	1.9738	1.30727	0.216475
1,7-Dimethylxanthine	Nucleotide And Its Derivates	181.1	180.065	[M+H]+	0.120859	1.37286	4.66213	0.343542	1.58202	1.59948	5.65498	3.53978	0.0867737	6.29377	3.83231	2.69313	4.40727	2.84924	1.86059	1.84339	2.17719	6.46931	1.58245	0.0218504	2.75948	2.26887	0.365314	0.432496	5.59959	0.498838	1.17752	6.5029	2.35446	0.0866769	0.00431859	2.56101	0.00891745	0.00940784	0.27712	0.292312	0.122825	0.891736	0.016725	0.20713	0.0107717	0.291518	0.0155566	0.339176	0.0368316
1-Methyladenine	Nucleotide And Its Derivates	150	149.07	[M+H]+	0.556585	0.441412	0.344588	0.754281	0.563417	0.616746	0.713086	1.25599	0.848946	0.626653	0.910819	1.00739	0.538678	1.04679	0.591018	1.09404	1.15386	0.985914	0.817881	1.63187	1.24085	1.55927	1.51824	0.992233	0.977859	0.706907	0.633822	0.712011	1.05879	1.38807	0.850315	0.877546	0.996748	0.628604	0.487788	0.676803	0.731449	0.640657	0.670825	0.778221	0.50578	0.868077	0.998373	0.638896	0.816649
1-Methylhistidine	Nucleotide And Its Derivates	170.1	169.085	[M+H]+	0.483679	0.600285	0.461632	0.552784	0.734084	0.360904	0.541546	0.355744	0.168101	0.306702	0.272007	0.154236	0.194863	0.378894	0.177502	0.356653	0.130134	0.210577	0.1893	0.142265	0.109436	0.174491	0.21095	0.247337	0.157304	0.222015	0.297537	0.115905	0.365621	0.275741	0.153014	0.267234	0.137902	2.4514	1.85476	0.789129	2.15286	2.15894	2.22565	1.03673	1.40033	1.32634	2.55173	1.54742	2.35148
2'-Deoxyinosine	Nucleotide And Its Derivates	253.1	252.086	[M+H]+	0.397429	1.24627	0.516116	0.84799	0.465011	1.07594	0.725709	1.17631	0.698158	0.745602	0.717019	0.854347	0.900725	0.806724	1.25873	0.498907	0.702609	0.749378	0.999067	0.955867	1.2634	0.841278	0.46532	1.17281	3.75718	0.702207	0.750295	0.88101	0.907654	0.777232	0.489834	0.74369	0.37127	0.759289	1.12889	0.697063	0.844488	0.480095	0.688771	0.628229	0.659142	0.101111	1.19673	0.894354	0.530502
5,6-Dihydro-5-Methyluracil	Nucleotide And Its Derivates	129.1	128.059	[M+H]+	0.869963	0.698085	1.09709	0.794591	0.932726	0.542053	1.23829	1.08491	0.622125	1.64157	0.413166	0.922066	0.702077	0.976477	0.675585	0.711734	0.761287	0.831301	0.980338	1.59026	0.466006	0.412944	0.859247	1.22812	1.26184	0.815098	0.634021	1.06322	1.17516	0.864226	0.871582	0.909749	1.38219	0.505392	0.50946	1.76451	0.63011	0.467394	0.740598	0.762484	0.372636	0.524713	0.562838	0.791296	0.508293
5-Methyluridine	Nucleotide And Its Derivates	259.085	258.085	[M+H]+	0.182609	0.175709	0.220353	0.230731	0.214557	0.218762	0.240739	0.304337	0.168923	0.304014	0.30151	0.252943	0.283734	0.35592	0.292193	0.288796	0.281463	0.279457	0.278365	0.181908	0.186446	0.271218	0.242716	0.24766	0.220244	0.218081	0.231613	0.238284	0.209805	0.253964	0.244576	0.300082	0.236806	1.132	1.49315	0.697588	1.73985	1.46639	1.30741	0.742185	0.913133	0.645886	1.28123	1.04847	1.42053
7-Methylxanthine	Nucleotide And Its Derivates	167	166.049	[M+H]+	0.579883	0.723123	1.36979	0.788793	1.37968	0.766096	3.8687	3.26213	0.813546	3.26606	1.27249	1.28585	2.08197	0.834095	0.616233	1.12813	1.76587	1.50867	0.680339	0.603564	1.74161	40.7103	9.31174	1.07755	1.8934	1.12578	1.63967	8.16305	1.23355	1.18788	0.920312	1.34818	0.852634	1.34547	0.81646	1.26279	1.55101	4.11565	0.793071	0.640181	0.766877	0.813266	0.765981	0.820609	1.01909
8-Hydroxyguanosine	Nucleotide And Its Derivates	300.1	299.087	[M+H]+	0.174298	0.47101	0.499226	0.304362	0.612475	0.489559	0.431847	0.371225	0.368803	0.153977	0.61527	0.574987	1.13364	0.361297	0.165873	0.431278	0.606133	0.227901	0.629897	0.736017	0.0907115	0.744922	0.284649	0.781329	0.163837	0.335708	0.270206	0.0818749	0.13181	0.462019	12.0015	0.272079	0.15282	0.581083	1.67691	0.807635	1.33118	2.97655	1.04552	0.184572	0.617795	0.303252	2.19041	0.500585	0.658402
Adenine	Nucleotide And Its Derivates	136.1	135.055	[M+H]+	0.823311	1.23242	0.921465	0.856281	1.01269	1.01481	1.01231	0.991412	0.995804	1.094	1.09881	0.873701	1.04423	0.824469	0.986334	0.827778	0.933866	0.922178	0.973521	0.948239	0.851877	0.75251	0.820672	1.06697	0.962512	1.14545	0.904226	0.818409	0.916147	1.13389	1.18567	1.08704	0.97143	0.672725	0.905784	1.17397	0.790764	0.556307	0.573615	0.688253	0.920629	0.951495	0.961387	0.629224	0.887174
Adenosine	Nucleotide And Its Derivates	268.097	267.097	[M+H]+	1.10799	1.00888	0.908308	0.995835	0.916397	0.785429	1.10942	1.43014	1.60679	1.31925	1.35181	1.20945	1.0274	1.10945	1.0543	0.981023	1.072	0.886132	1.13529	0.906731	1.09639	1.20471	1.0269	1.52879	1.12213	0.972817	1.23965	0.904857	1.02208	1.22066	1.85019	0.983342	0.877045	0.922983	0.995522	0.80942	0.987695	0.841403	0.971697	1.33029	1.05291	2.9369	0.827683	0.968904	0.934217
Cytidine	Nucleotide And Its Derivates	244.086	243.086	[M+H]+	0.253575	0.188356	0.256236	0.287874	0.417817	0.263026	0.355172	0.342986	0.350999	0.529627	0.251381	0.23054	0.232948	0.300924	0.354832	0.139736	0.305327	0.409927	0.220231	0.188555	0.241008	0.262483	0.271699	0.238013	0.28003	0.216871	0.270696	0.2304	0.318826	0.264062	0.251874	0.22267	0.271858	1.14982	1.32966	0.669256	1.91514	1.46967	1.53814	0.658508	1.00393	0.87993	1.36227	1.00745	1.68815
Guanosine	Nucleotide And Its Derivates	284.092	283.092	[M+H]+	0.892299	0.906526	0.352726	0.738964	0.491553	0.204727	0.494336	1.64649	0.477326	0.89059	0.857707	1.62352	0.340581	0.57775	1.08753	0.230494	0.23211	0.588429	1.10463	1.27336	0.501777	0.765538	0.283652	1.31658	1.29686	0.848799	1.46244	0.602045	0.50058	0.333454	0.192814	0.484156	0.290758	1.03309	2.83065	2.03347	1.15499	0.23394	0.746836	2.52176	2.21616	0.954137	2.14609	0.7337	0.468605
Nicotinic Acid Adenine Dinucleotide	Nucleotide And Its Derivates	664.11	663.109	[M+H]+	0.559521	0.441515	0.393149	0.534512	0.322794	0.303183	0.375905	0.434618	0.654922	0.499689	0.864963	0.554402	0.678638	0.780337	0.559572	0.624346	0.656748	0.382664	0.684567	0.311606	0.548267	0.540439	0.341903	0.584928	0.730374	0.638537	0.54542	0.674216	0.465908	0.879279	0.723563	0.649575	0.621772	1.52814	0.764983	1.50573	0.926505	1.05975	1.11705	1.19588	1.17359	1.59595	0.670651	1.20882	0.997066
Uracil	Nucleotide And Its Derivates	113.027	112.027	[M+H]+	1.02759	1.00502	1.00669	1.0844	1.15135	1.15979	0.824117	0.806821	0.934792	1.59723	1.29415	1.2551	0.59414	1.17296	0.548918	0.642717	0.849379	1.32513	0.614474	0.975754	0.926361	0.705154	0.772808	0.804648	0.989958	0.758812	0.921964	0.546258	1.10727	1.03827	0.757794	0.583575	0.920016	0.633237	1.03511	0.812225	0.54919	0.734059	0.787306	1.00871	0.649934	0.575843	0.613119	1.1225	0.936614
L-Isoleucine	Amino Acid	132	131.095	[M+H]+	0.984968	0.894803	0.968138	0.98698	1.04189	0.991465	0.97632	1.04568	1.06315	1.08455	1.05535	0.936752	1.02189	0.9567	1.04117	0.958755	1.08802	1.05605	1.03808	1.02816	1.07311	1.03638	1.05262	1.06723	1.05284	1.06031	1.05639	1.04761	1.07237	1.06783	1.01578	1.10762	1.10617	1.00048	1.01019	0.930134	0.956271	1.00073	1.0147	0.959778	1.01218	0.889649	1.02676	1.0521	1.00515
1-Methyladenosine	Nucleotide And Its Derivates	282.1	281.26	[M+H]+	0.512887	0.662771	0.530727	0.767951	1.12825	0.809711	0.778091	0.956371	0.745342	1.26376	0.589135	0.794888	0.508918	0.578023	0.747804	0.387166	0.699252	0.643018	0.430966	0.57302	0.538619	0.820272	0.887328	0.816346	0.755686	0.402849	0.466391	0.548842	0.744933	0.48698	0.628314	0.716864	0.659099	1.42218	1.54185	0.781219	2.02595	1.4963	1.29348	1.15	1.14195	0.989574	1.35378	1.18636	1.38145
3,3',5-Triiodo-L-Thyronine	Hormones	651.7	650.79	[M+H]+	0.67259	0.740022	0.673772	0.637111	0.46334	0.546898	0.514847	0.815844	0.69575	0.800407	0.602722	0.563413	0.751093	0.681816	0.552698	0.619283	0.626806	0.732445	0.75738	0.726921	0.589358	0.66901	0.530631	0.629475	0.660548	0.841103	0.646002	1.1415	0.852008	0.619101	0.753841	0.745052	0.773861	0.279335	0.325228	0.29031	0.101238	0.189217	0.414091	0.297397	0.466048	0.439464	0.262034	0.430076	0.218171
Epinephrine	Hormones	184	183.09	[M+H]+	1.2291	1.32636	0.98626	1.20715	1.21992	1.01565	0.603632	0.815489	1.13679	1.16907	0.734074	1.65151	1.298	0.949873	0.848791	1.14579	1.18612	0.605879	1.13341	1.52032	1.09534	1.06506	1.15083	0.99728	1.19319	0.58863	0.834095	1.12568	1.40712	1.93578	1.88034	1.49857	1.58454	1.16423	1.07642	0.946887	0.874315	1.32417	1.03434	0.7704	0.70977	0.580344	1.30922	1.03571	0.810446
Metanephrine	Hormones	198.1	197.105	[M+H]+	0.987032	0.835938	0.444219	1.0578	1.25015	0.56916	0.881475	0.48804	0.505882	0.277767	0.914316	0.801535	0.724242	0.927487	0.576839	0.34477	0.128488	0.711048	0.414415	0.467715	0.74834	0.771945	1.38453	0.911332	0.602322	0.924525	0.549437	0.983935	0.452152	0.912889	1.06071	1.14395	0.553854	1.63997	1.65695	0.719932	2.3879	2.63423	1.11706	2.88742	1.33056	0.2977	2.23407	0.930229	1.07936
Norepinephrine	Hormones	170	169.074	[M+H]+	0.943104	0.583349	1.02565	0.964157	0.861833	0.787247	0.916808	0.843238	0.547264	1.12907	0.593707	0.798687	0.759335	0.952644	0.865468	0.878767	0.783658	0.768791	0.935831	0.760928	0.998607	1.05522	0.837062	1.26819	1.22166	1.24319	1.36929	0.68528	1.32837	1.42801	1.75241	0.891412	1.6508	0.698452	1.09768	1.82159	0.774011	1.09044	0.882701	0.811199	0.677055	1.01637	1.23233	0.919932	1.2138
Progesterone	Steroids And Steroid Derivatives	315.1	314.1	[M+H]+	0.995302	0.486741	0.293183	0.617682	0.400278	0.617043	0.468644	0.742781	1.02873	0.439331	0.563735	0.185273	0.714229	0.679691	0.812719	0.596251	0.645708	1.01164	0.676641	0.750405	0.65642	0.815102	0.793608	0.615976	0.571074	0.527015	0.619218	0.456154	0.715223	0.441127	0.266806	0.538627	0.831427	0.755515	0.511785	0.674176	0.47722	0.613467	0.64992	0.407285	0.390926	0.396838	0.34943	2.75979	0.777373
L-Leucine	Amino Acid	132.1	131.095	[M+H]+	1.00469	0.902506	0.952602	1.05221	1.0526	1.03043	1.03546	1.03163	1.03865	1.08895	1.06622	1.01592	1.01066	1.01562	1.05311	0.998058	1.06193	1.06927	1.03849	1.0099	1.09128	1.0592	1.03525	1.07813	1.06458	1.0044	1.05424	1.02384	1.02185	1.032	0.975252	1.10498	1.10249	0.974561	0.990215	0.893764	0.953229	0.992715	1.00482	0.975955	0.967927	0.843794	1.01694	1.03047	0.957138
L-Methionine	Amino Acid	150	149.051	[M+H]+	0.894169	1.34241	1.16879	0.817833	1.01596	1.02055	0.994213	1.15358	0.963117	0.981231	0.999305	1.0329	0.972014	0.966751	1.02762	0.807359	0.869533	0.72558	0.996565	1.06556	0.79404	0.657715	1.00243	1.02763	0.863081	1.00645	0.83451	0.923748	0.917502	1.19415	0.933461	1.08536	1.23522	0.707657	0.936411	1.37441	0.549956	0.600418	0.828733	0.87814	1.19877	1.01055	1.32406	0.987642	1.02482
Lysinamide	Others	146.1	145.122	[M+H]+	1.36255	1.41224	1.11563	1.03049	1.01895	1.22861	1.03023	0.913488	1.05077	0.8448	0.91127	0.824559	0.881345	0.860056	0.748027	0.696872	1.21627	0.841333	0.773886	0.828752	0.829663	0.714206	0.892314	0.885699	0.808619	0.843952	1.27488	0.937829	0.79205	1.01362	0.937702	0.781612	0.715366	0.999317	0.968545	0.90883	1.55785	0.82955	0.954793	1.3035	1.39986	0.999096	1.92784	1.06465	1.34222
L-Carnitine	Camitine	162	161.105	[M+H]+	1.44906	0.76428	1.2439	1.33911	1.26181	1.64164	1.13801	0.904127	0.790314	0.929066	0.77738	1.15394	0.828297	0.819681	0.719962	0.821932	0.804593	0.737928	0.707537	0.843197	0.852262	0.696061	0.922015	0.946015	0.780635	0.90216	0.871909	0.994973	1.10611	1.22442	1.01591	1.28166	1.08025	1.15788	1.93128	3.47086	1.08719	0.675756	1.08173	0.280454	1.23046	0.658752	4.70166	1.91886	1.12341
N-Acetyl-5-Hydroxytryptamine	Tryptamines And Its Derivatives	219	218.106	[M+H]+	0.821549	0.622713	0.686518	0.449711	0.70923	0.726968	0.501348	0.701173	0.678517	1.07103	0.998323	0.72606	0.672877	0.635383	0.61905	0.696531	0.498888	1.06156	0.672404	0.635231	0.581867	0.922156	0.979693	0.653505	0.529295	0.887752	0.744907	0.769802	0.73945	1.06708	1.34318	0.815343	0.811866	2.98927	1.35698	1.31957	1.09551	0.729525	0.337843	1.30079	0.957238	4.45033	1.39377	2.22149	2.01649
D-Arabitol	Sugar Alcohols	153.069	152.069	[M+H]+	1.56727	1.24895	0.891277	0.445186	0.693881	0.838871	0.539285	1.45263	0.861737	0.48683	0.868668	0.837848	0.700262	0.766997	0.854373	0.999981	1.14003	1.37087	1.10416	0.866059	1.37632	0.774987	1.20519	0.749428	0.420763	0.748066	0.863741	0.826174	0.838034	0.788315	1.38649	1.04254	1.30395	0.786054	0.805155	0.825628	0.803894	0.62251	0.764988	0.734961	1.11106	1.13988	0.697281	0.823271	0.603921
D-Mannitol	Sugar Alcohols	183.08	182.079	[M+H]+	0.98062	0.991761	0.743546	0.817805	0.701804	0.416278	0.346338	1.00578	0.933802	0.846156	0.758271	0.908349	0.542413	0.537883	0.651046	0.501715	0.462078	0.498401	0.684665	0.687411	0.905967	0.72287	0.914534	0.706166	0.508158	0.282294	0.855784	0.821771	1.06573	0.88366	1.2209	1.16195	1.33981	0.653151	0.8797	0.979977	1.14833	1.37091	1.35243	0.841479	0.961007	0.88824	1.19814	0.975258	0.826309
Ribitol(Adonitol)	Sugar Alcohols	99	152.069	[M+H]+	0.77904	0.819826	1.2104	1.20979	1.27866	0.82999	0.777777	1.24947	1.05544	0.853982	0.770436	0.732392	0.807199	0.632509	0.749022	0.494899	0.62212	0.861815	0.758327	0.658158	0.457148	0.455998	0.44393	0.398239	0.396151	0.471922	0.374268	0.352793	0.309524	0.359235	0.351969	0.315548	0.33138	1.12786	1.17991	0.941028	0.900806	0.549904	0.526805	0.593178	0.7774	0.815093	0.573642	0.354439	0.297158
L-Proline	Amino Acid	116.1	115.063	[M+H]+	4.1523	4.36315	6.41163	5.96033	5.83867	4.14735	1.5708	0.551181	0.716876	0.392804	0.669672	0.744657	0.667801	0.633013	0.490498	0.614411	0.682463	0.661134	0.626967	0.769551	0.738743	2.03868	0.868623	1.07108	0.77863	0.957473	0.496597	0.645748	0.607567	0.932576	0.751844	0.495292	0.770762	0.655001	1.08165	0.0332498	0.111366	0.747896	0.625718	1.10005	1.03102	0.0723043	1.23109	2.48691	0.253901
Xylitol	Sugar Alcohol	153	152.069	[M+H]+	0.864562	0.836248	0.912365	1.02313	1.04222	0.618913	0.792211	0.749697	0.89149	0.783276	0.698276	0.8735	0.872297	0.703428	1.00067	1.16538	0.631221	0.863345	0.746995	0.832986	1.09165	0.754008	0.862419	0.689713	0.59365	0.747704	0.751702	0.728128	1.01682	0.854134	0.936837	1.09349	0.91942	1.30047	1.13383	1.34675	1.44122	1.52541	1.84119	2.35714	2.67577	2.43605	1.88687	1.32095	0.909304
D-Glucose	Carbohydrates	181	180.063	[M+H]+	1.12268	1.00905	1.10018	0.98973	0.978998	1.09358	1.01571	0.823095	0.928487	0.895167	0.807995	0.978854	0.825896	0.972486	0.929879	0.783966	0.795473	0.862895	0.937305	0.889444	0.935167	0.880956	0.885831	0.897094	0.933064	0.964115	1.13095	1.05956	1.02063	1.05786	1.12881	1.03885	0.973565	0.783305	0.837014	0.976148	0.919362	0.875801	0.876714	0.863825	0.917543	0.908106	0.948396	0.927401	1.00254
D-Glucono-1,5-Lactone	Sugar Acids And Derivatives	179.05	178.048	[M+H]+	1.3822	1.56013	1.15064	1.17713	1.06276	1.29461	1.44635	1.53756	1.1142	1.09071	1.51206	1.24605	1.42185	0.837073	1.52319	1.3069	1.25227	1.12893	1.16628	0.9556	1.31117	0.952184	0.806734	1.20538	0.910583	1.01484	1.55509	0.881695	0.623056	0.643503	0.93548	0.914611	0.81753	0.927381	0.531798	1.1561	1.07258	1.08051	0.693551	1.19563	0.768339	0.835831	0.865144	0.878874	0.860261
Gluconic Acid	Sugar Acids And Derivatives	197.058	196.058	[M+H]+	1.00125	0.934499	0.638062	0.657998	0.574669	0.597898	0.623922	0.517373	0.648765	0.679217	0.529635	0.393035	0.770526	0.618816	0.614351	0.580667	0.639087	0.767769	0.668881	0.724624	0.784368	0.789929	0.656155	0.752175	0.748201	1.13653	0.712264	0.936223	1.13345	1.35562	1.58941	1.20506	1.13902	0.99177	1.02316	0.771829	0.674009	1.20727	1.66116	1.26936	1.27238	1.22737	1.30785	1.12065	1.39026
L-Gulonic-Γ-Lactone	Sugar Acids And Derivatives	179.048	178.048	[M+H]+	0.754118	0.884028	0.816192	1.03792	0.832319	0.90546	0.801134	0.662636	0.860915	0.976935	0.950389	1.05128	0.913095	1.22473	0.870289	0.969021	1.17554	0.475156	1.27044	0.906885	0.929116	0.937159	1.14903	1.1817	0.822666	1.08596	0.773743	1.11416	1.08302	0.720039	1.2371	0.8513	1.10311	0.780267	0.676872	1.2968	0.502299	0.882619	0.55433	0.850876	0.702392	0.660247	0.775731	0.938101	1.16146
L-Ascorbate	Vitamine	177	176.032	[M+H]+	1.11811	1.38711	1.21888	1.03349	1.01662	0.941919	0.914669	1.28256	0.917738	1.15757	1.03661	1.15746	1.0808	1.01145	1.20449	1.11527	1.11932	0.998513	1.03124	1.24072	1.34481	1.38209	1.11928	1.00738	1.19068	1.17453	1.2246	1.19289	1.13013	1.02701	1.2085	1.14373	1.05637	0.557781	0.549686	0.528326	0.601585	0.587264	0.351793	0.493888	0.540124	0.434637	0.467416	1.38255	1.00425
Orotic Acid	Vitamins	157	156.017	[M+H]+	1.18586	0.949222	0.77589	0.912303	0.915742	1.08549	1.22959	1.36232	1.29286	1.06485	0.981506	0.952869	1.11263	0.993702	1.04014	1.04617	1.1591	1.01338	1.39877	1.47977	1.28826	1.21943	1.27021	1.57803	0.741527	1.20523	0.999026	1.51718	1.21959	1.30769	1.34398	0.911981	1.25149	1.87907	1.06209	1.36857	1.25319	1.2838	1.54973	0.588779	0.814983	1.33043	1.04877	0.585654	0.88394
Nicotinamide	Vitamin	123.1	122.1	[M+H]+	0.484159	0.994437	0.467857	0.454693	0.558192	0.842068	0.644036	0.430594	0.532727	0.861152	0.755458	0.813625	0.445132	0.534893	0.628649	0.480054	0.622662	0.369574	0.391988	0.34675	0.412099	0.323036	0.683895	0.2442	0.33698	0.425488	0.351224	0.57645	0.341344	0.436166	0.437342	0.288625	0.231549	1.97572	1.17166	3.48077	0.450221	0.853972	1.6916	1.02944	0.963473	1.15865	0.818827	1.2362	1.30437
4-Oxoretinol	Vitamine Related	301.2	300.209	[M+H]+	0.852474	0.722208	0.544149	0.327021	0.34244	0.753294	0.482476	0.893962	0.910429	0.903803	0.825637	1.01995	0.590371	0.692271	0.831754	0.810668	0.951795	0.782449	0.673426	1.28319	1.11736	1.06304	1.39932	0.908831	0.870065	0.610512	1.10272	1.52144	1.38834	1.1783	1.02181	1.7356	0.868537	0.710664	1.18786	1.17194	0.77536	1.25134	0.571982	0.833213	0.706784	1.07908	1.13305	1.05945	1.08207
Nicotinic Acid	Vitamine Related	124	123.032	[M+H]+	1.24932	0.825654	0.945044	0.457696	0.596825	1.00264	0.606023	1.39381	1.25917	1.70578	1.29855	0.811367	0.607527	0.775938	0.911849	1.01108	0.51931	1.02564	1.59541	0.960416	0.946716	0.763217	0.811695	0.580579	1.35643	0.45787	0.507767	1.55296	1.27672	1.17805	0.84344	1.02733	1.27953	0.374972	1.11182	1.97276	0.844045	1.40077	0.59771	1.3016	0.987062	0.680447	1.65156	0.916562	3.31859
Nicotinuric Acid	Vitamine Related	181.1	180.054	[M+H]+	0.449208	1.0688	0.816459	1.22412	0.89475	0.823517	0.869758	0.82316	0.449828	1.17055	0.726215	0.822597	0.656161	0.707948	1.06719	0.51944	1.45118	1.36072	0.948433	0.735094	2.32102	0.802307	1.73444	1.22497	1.65843	1.30858	1.1423	1.37798	1.88076	1.34165	2.68145	1.24002	0.795528	0.53352	0.415002	0.788262	0.969892	0.647366	0.653361	0.807862	1.11257	1.3739	0.721748	1.2576	0.330792
Pantothenol	Vitamine Related	206.13	205.131	[M+H]+	0.0748421	0.271324	0.162858	0.166045	0.0762777	0.218828	0.108596	0.10592	0.142405	0.147261	0.401624	0.192336	0.0289744	0.232724	0.274806	0.223208	0.0978698	0.204818	0.118457	0.123492	0.32739	0.172691	0.44636	0.420019	0.244416	0.0980999	0.258028	0.0910256	0.201702	0.105709	0.229591	0.100629	0.12817	0.133068	9.06584	0.784824	0.629714	14.8444	0.209061	0.373205	0.413112	0.598459	7.03011	0.256785	2.17449
L-Tryptophan	Amino Acid	205.1	204.09	[M+H]+	1.06687	1.13953	1.10869	1.0565	1.11095	1.1052	1.07518	1.03422	1.08431	1.03563	1.07955	1.07396	0.995889	1.04332	1.01401	1.05212	1.05803	1.04082	1.0794	1.02301	0.984992	1.01834	1.0814	1.0523	1.00489	1.02406	1.09353	1.10205	1.01624	1.08763	1.07243	1.05722	0.953676	0.966784	0.844532	0.942922	0.758887	0.576355	0.772394	0.900787	0.983775	0.974544	0.863651	0.786488	0.902484
Isonicotinamide	Vitamine Related	123.1	122.1	[M+H]+	0.407508	1.16587	0.414013	0.446071	0.564841	0.799237	0.651959	0.456129	0.492322	0.845967	0.831147	0.777735	0.473976	0.433947	0.534235	0.483467	0.650626	0.314305	0.333253	0.335742	0.510574	0.334227	0.64824	0.282397	0.32062	0.473648	0.365995	0.607044	0.320861	0.455251	0.451172	0.380212	0.279543	1.89071	0.996683	3.39799	0.504933	0.970501	1.68844	1.14793	1.03035	1.27985	0.899678	1.08316	1.46688
L-Valine	Amino Acid	118.1	117.079	[M+H]+	0.843602	1.15852	1.17204	0.863375	0.853002	1.06516	1.21698	0.958627	1.06673	0.810409	0.883308	1.13429	0.834937	0.823533	0.664629	1.03991	0.7391	0.820805	0.675036	1.04187	0.710028	0.657408	1.0298	0.817525	0.861071	0.93264	0.683848	0.838016	0.791086	0.925824	0.97778	0.763685	0.669827	1.00386	0.855325	1.36495	1.71889	0.935234	1.33076	1.31487	2.68603	3.23542	2.3365	1.83718	2.70432
3-Indolebutyric Acid	Indole And Its Derivatives	204.1	203.095	[M+H]+	0.239105	0.242153	0.27852	0.150985	0.130506	0.234607	0.349033	0.317601	0.175188	0.18829	0.236435	0.137085	0.241079	0.359501	0.173152	0.168467	0.269143	0.18552	0.362498	0.169637	0.210013	0.312789	0.192633	0.219692	0.234441	0.265365	0.291456	0.25917	0.203489	0.340429	2.38419	0.334729	0.370385	0.355091	2.66454	0.297421	1.59514	2.00148	1.16029	1.06709	0.651227	0.533036	0.433626	0.843942	0.473986
3-(3,4-Dihydroxyphenyl)-2-Methylalanine	Amino Acid And Its Derivatives	212.2	211.085	[M+H]+	0.537663	0.608936	0.74155	0.639101	0.655902	0.594967	0.36207	0.698556	0.522125	0.802919	0.583402	0.451672	0.55214	0.659786	0.64403	0.523204	0.463512	0.78026	0.755657	0.496887	0.456008	0.948072	0.572871	0.623792	0.515668	0.623039	0.464804	0.612091	0.708915	0.570342	0.523296	0.579997	0.759265	0.782902	1.05389	0.597013	1.62618	1.56166	1.12715	0.664395	0.68835	0.744845	0.746663	0.62961	1.45903
Indole-3-Acetic Acid	Indole And Its Derivatives	176.1	175.063	[M+H]+	0.687525	0.91029	0.780912	0.434084	0.491406	0.437412	0.624897	0.570073	0.443618	0.425766	0.451384	0.493276	0.323997	0.4806	0.497218	0.638096	0.575281	0.707365	0.625134	0.597982	0.576331	0.560218	0.566576	0.938805	0.473641	0.373238	0.641268	0.464361	0.190288	0.565555	4.01596	0.556577	0.578035	0.617044	3.62586	0.583091	3.2836	2.7857	1.31423	0.846153	0.479015	0.771485	1.17615	0.548808	0.581643
Methyl Indole-3-Acetate	Indole And Its Derivatives	190.1	189.079	[M+H]+	1.18738	1.73365	0.512395	0.612483	0.424516	0.443512	0.796879	0.634151	0.907561	0.643459	0.689012	0.800095	0.620679	0.547296	0.484437	0.349529	1.27052	0.40721	0.398153	0.591818	0.603917	0.483851	0.607753	0.796464	0.655961	0.522216	1.11128	0.441633	0.463335	0.605857	0.524386	0.53771	0.315132	0.618523	7.80703	0.633021	8.23924	5.39453	1.02998	1.47053	1.08367	0.674373	4.91729	0.362278	1.41215
N-(3-Indolylacetyl)-L-Alanine	Indole And Its Derivatives	247.1	246.1	[M+H]+	0.718219	0.112942	0.0704629	0.856294	0.3535	0.464568	1.34619	1.84698	0.717245	1.12489	1.04273	0.719811	1.21753	1.92313	0.77614	0.146026	0.482793	1.61223	0.070347	0.530642	0.621053	1.08268	0.35985	2.99734	1.19914	0.655091	1.7786	1.70393	2.66963	0.951814	0.650467	2.71209	0.933722	0.607352	0.495541	2.50308	3.0735	0.585621	4.27947	15.8405	1.09	0.37431	1.60163	1.10246	2.57093
3-Methylcrotonyl Glycine	Organic Acid And Its Derivatives	158.1	157.074	[M+H]+	0.0891064	0.131991	0.0293418	0.100184	0.113768	0.0969776	0.277642	0.0766804	0.0400815	0.0896841	0.070483	0.200449	0.0851483	0.121576	0.12088	0.0867252	0.0974639	0.120232	0.0753422	0.115207	0.0572143	0.106064	0.081317	0.136011	0.104912	0.156142	0.177153	0.128272	0.162845	0.0974765	0.132082	0.0900298	0.0769464	1.60927	0.731263	0.305789	1.99456	0.837435	0.657916	0.268669	0.314408	1.34674	1.17251	0.67028	4.35285
4-Acetamidobutyric Acid	Organic Acid And Its Derivatives	146.074	145.074	[M+H]+	0.25164	0.251547	0.220782	0.253663	0.227471	0.181085	0.174043	0.172711	0.158915	0.188515	0.289025	0.17616	0.283329	0.272107	0.27321	0.215118	0.181117	0.239624	0.139116	0.166391	0.148775	0.169018	0.164737	0.163568	0.174825	0.191391	0.197255	0.250283	0.237313	0.265022	0.38835	0.176616	0.205218	1.44216	1.90708	0.749102	1.83873	3.11104	0.973925	0.404845	0.517947	0.434543	1.87712	0.641506	3.50147
4-Guanidinobutyric Acid	Organic Acid And Its Derivatives	146.085	145.085	[M+H]+	0.595756	0.841361	0.892769	0.834996	1.01663	1.0663	0.713767	0.787301	0.838943	0.681541	0.940289	0.768112	0.742296	0.984979	0.665982	0.748197	0.646311	0.859313	0.855351	0.537225	0.641372	0.658894	0.594453	0.780186	0.866335	0.731376	1.04283	0.576819	0.949184	0.825821	0.571494	0.831158	0.668904	1.19275	1.15893	2.28437	1.30678	0.648678	0.774694	0.319297	0.851867	0.473725	2.34568	1.22173	1.10088
6-Aminocaproic Acid	Organic Acid And Its Derivatives	132.095	131.095	[M+H]+	0.791466	1.08848	0.994109	0.716133	0.822966	0.722249	1.03711	0.977257	1.00785	0.812156	0.977674	0.976261	0.944485	0.899719	0.677713	0.992937	0.77826	0.774785	0.760337	0.882684	0.682049	0.629145	0.877595	0.808396	0.651243	0.892555	0.656458	0.850616	0.746347	0.948063	0.905416	0.724932	0.69824	0.864184	0.873906	1.25295	0.92004	0.681656	0.976225	1.13484	1.06872	1.38596	0.817807	0.794111	1.18648
Azelaic Acid	Organic Acid And Its Derivatives	189.105	188.105	[M+H]+	0.720089	0.819774	0.772177	0.603505	0.708303	0.589038	0.554739	0.606046	1.07121	0.715	0.549644	0.636642	0.726772	0.595292	0.640192	0.691837	0.613215	0.671955	0.756395	0.536222	0.652382	0.579809	0.609297	0.723011	0.613471	0.664067	0.574822	0.452644	0.594098	0.619874	0.558869	0.604055	0.620693	4.57658	1.1834	0.906822	0.753823	1.90819	1.24017	0.696098	0.754095	3.39348	2.31979	0.975895	0.954978
D-Methionine	Amino Acid	150.1	149.051	[M+H]+	0.866064	1.3321	1.14826	0.809473	1.04032	1.0957	1.01542	1.11218	0.965056	0.941898	0.964091	1.03142	1.00256	0.804686	1.02593	0.769689	0.833671	0.79722	0.951691	1.12583	0.741704	0.674483	0.992892	1.05548	0.845687	1.01943	0.818274	0.854829	0.84933	1.2378	0.975164	1.03096	1.07278	0.748843	0.920565	1.41877	0.582429	0.587172	0.83074	0.909801	1.2736	1.02172	1.43465	0.967749	1.02334
Creatinine	Organic Acid And Its Derivatives	114.059	113.059	[M+H]+	0.286909	0.3757	0.308932	0.338063	0.387977	0.250063	0.272036	0.325348	0.352938	0.269095	0.291807	0.300629	0.26048	0.31683	0.25168	0.231479	0.258462	0.3069	0.166718	0.188399	0.201229	0.249629	0.208376	0.275293	0.195748	0.202943	0.236674	0.256745	0.223586	0.226435	0.215352	0.202352	0.190016	2.25022	1.829	0.821335	2.4021	3.14445	1.89807	0.899612	0.811596	0.644084	2.75155	1.34933	2.06119
D-2-Aminobutyric Acid	Organic Acid And Its Derivatives	104.1	103.063	[M+H]+	1.05088	1.59065	1.64121	1.00557	1.03875	1.08704	0.948816	0.901516	0.889149	0.839136	1.20754	1.04688	1.26652	1.17253	1.20555	1.44734	0.871355	1.08788	1.19153	0.999303	0.86825	0.763423	0.797773	0.74084	0.734541	1.08135	0.999706	1.47215	1.0559	1.24396	1.19869	0.990555	0.802998	0.989928	0.751781	0.947841	0.854892	0.504409	0.863184	0.575164	0.744329	0.779816	0.708515	0.693563	0.827613
Dl-2-Aminooctanoic Acid	Organic Acid And Its Derivatives	160.126	159.126	[M+H]+	1.42802	1.92114	1.84017	1.30366	1.72944	1.5868	0.975398	1.78051	0.8887	1.39891	0.462304	1.03304	1.28992	1.59684	0.875065	2.2968	0.970454	2.5744	1.30241	0.411664	0.75726	1.61491	1.04548	1.37519	0.38642	3.37198	0.498436	0.679526	1.10636	1.34095	1.59649	0.802522	1.42876	0.945048	0.566546	0.371468	0.347521	0.524571	0.466543	0.216353	0.601271	0.652609	0.28518	0.714493	0.411566
D-Pipecolinic Acid	Organic Acid And Its Derivatives	130.2	129.079	[M+H]+	0.976104	0.926723	0.957129	0.860208	0.962763	1.0262	1.10423	0.91974	1.02051	1.09822	0.972451	0.924824	0.879471	0.920376	0.826113	0.912384	0.72608	0.862623	0.867287	1.0232	0.816635	0.748083	0.802958	0.917468	0.765315	0.845933	0.732487	0.942772	0.798067	0.957458	0.877652	0.937856	0.809978	1.18577	1.00109	0.835959	0.905743	0.806587	0.781588	0.788763	0.874124	0.860328	0.928633	0.877526	0.829214
Ethyl 3,4-Dihydroxybenzoate	Organic Acid And Its Derivatives	183.058	182.058	[M+H]+	0.294739	0.316216	0.434572	0.325241	0.181874	0.278703	0.24864	0.258034	0.227703	0.189248	0.238871	0.2548	0.260867	0.298321	0.279968	0.289761	0.393588	0.228298	0.707499	0.226152	0.459298	0.337628	0.33377	0.280715	0.635125	0.32676	0.477863	0.449724	0.547726	0.261284	1.26392	0.818337	0.628769	2.41475	1.4798	3.83532	1.1615	3.52341	1.21067	1.18563	0.383448	0.865116	2.27421	0.271131	2.55003
Ferulic Acid	Organic Acid And Its Derivatives	195.058	194.058	[M+H]+	0.686471	0.788928	0.998094	0.42186	0.311043	0.452347	0.288164	0.739504	0.729489	0.507862	0.428746	0.279895	0.579555	0.288294	0.642541	0.421263	0.25025	0.391251	1.04619	0.419738	0.439854	0.499356	0.488215	0.482434	0.507801	0.439869	0.398429	0.475973	1.03014	0.889505	0.586487	0.424848	0.720063	1.34073	1.84809	1.3648	1.61266	1.58797	1.50815	1.57283	1.5982	1.29282	1.62685	2.33447	1.59471
Homovanillic Acid	Organic Acid And Its Derivatives	183.058	182.058	[M+H]+	0.454545	0.606924	0.564401	0.394943	0.415691	0.362981	0.475676	0.322116	0.262703	0.310691	0.42976	0.494596	0.44787	0.713605	0.603843	0.27167	0.231895	0.29223	0.510991	0.250869	0.219095	0.355692	0.381237	0.359747	0.566916	0.281496	0.421987	0.374633	0.230134	0.393934	0.315337	0.832313	0.370505	0.806431	1.46147	0.772137	1.34441	1.46539	1.68	1.12055	0.918962	1.04237	1.64414	0.737328	0.618706
Kinurenine	Organic Acid And Its Derivatives	209.1	208.085	[M+H]+	0.512461	0.792669	0.538807	0.480957	0.489314	0.431951	0.342927	0.73678	0.53652	0.663944	0.619631	0.626257	0.482829	0.540716	0.617913	0.346015	0.655812	0.561352	0.350556	0.333431	0.479816	0.473496	0.521774	0.791814	0.646872	0.50538	0.563627	0.570328	0.532826	0.488199	0.856005	0.548248	0.466708	2.72722	1.71935	0.703265	1.30741	1.50479	1.10076	0.507408	0.753651	1.44824	1.64534	1.15374	2.47197
L-2-Aminobutyric Acid	Organic Acid And Its Derivatives	104.063	103.063	[M+H]+	1.178	1.42141	1.65941	1.18503	1.15061	1.03469	0.92535	0.866166	0.894239	0.907247	1.10528	1.10424	1.29867	1.20223	1.23521	1.34656	1.05579	1.23349	0.955326	0.941194	0.799944	0.940191	0.743937	0.879868	0.820205	1.11763	1.1216	1.70166	0.927773	1.31532	0.932421	0.978129	0.9201	0.884454	0.749727	0.859464	0.865525	0.573458	0.767582	0.577185	0.773046	0.818666	0.682526	0.682448	0.906039
Maleic Acid	Organic Acid And Its Derivatives	117.011	116.011	[M+H]+	0.343081	0.597898	0.4013	0.658936	0.321418	1.00416	0.52431	1.01345	0.981925	0.626094	0.693682	0.62863	0.694174	0.689303	0.875947	0.692106	0.643114	0.791287	0.812678	0.551225	0.645376	1.61398	0.789044	0.821793	0.751509	0.810078	0.819197	0.600745	0.588408	0.849958	0.794886	0.484869	0.762283	1.08728	1.93058	0.871352	0.693614	1.00936	0.956716	1.15942	0.858332	1.08475	1.2962	1.35402	1.90792
Subericacid	Organic Acid And Its Derivatives	175.1	174.089	[M+H]+	0.336676	0.311947	0.339011	0.334517	0.36841	0.339415	0.323779	0.259182	0.344085	0.313061	0.304906	0.354122	0.335209	0.339795	0.287382	0.283338	0.201957	0.301503	0.390502	0.243983	0.306247	0.253331	0.274553	0.279871	0.350263	0.263715	0.335281	0.303481	0.31018	0.353741	0.425071	0.355097	0.364987	2.87612	0.933603	1.65235	0.96366	3.50171	1.05475	0.810901	0.451695	2.62961	2.17199	0.579582	2.38406
Trans-Cinnamic Acid	Organic Acid And Its Derivatives	149.052	148.052	[M+H]+	2.20313	0.946603	2.47349	1.58756	1.33449	1.42887	2.93972	0.687799	1.83938	1.30001	2.82394	0.99638	3.31103	1.84072	2.01688	2.27356	0.696057	2.70652	0.655756	0.989859	1.8482	1.47291	0.844698	0.731556	0.795442	0.306372	0.647092	1.67422	1.38902	2.07625	3.34283	1.2819	2.27824	0.391847	0.364403	0.436567	0.221761	0.610121	0.193207	0.442824	3.8549	0.384326	0.521365	0.324107	0.15065
Uric Acid	Organic Acid And Its Derivatives	169	168.028	[M+H]+	1.20115	1.04527	1.20453	1.41859	1.13536	1.22517	1.17288	1.20588	0.884857	0.90988	1.13332	1.06347	1.14732	1.08736	1.29265	1.13531	1.26234	0.941549	0.994253	0.959948	0.874489	0.904877	1.07714	0.972851	0.725976	0.741486	1.2874	0.979298	0.844753	0.985623	0.865358	0.833234	0.793615	0.942038	1.11499	0.845453	1.34264	1.22579	1.42243	0.501737	1.2982	0.74319	1.17461	1.09415	0.940186
D-2-Aminobutyrate	Organic Acid And Its Derivatives	104.1	103.1	[M+H]+	1.02543	1.2725	1.47109	0.942878	0.802101	0.899855	0.709569	0.876245	0.94768	0.8097	1.09864	1.01221	1.20708	1.08023	1.14743	1.3761	1.00966	1.10433	1.17279	0.864453	0.832029	0.717986	0.83271	0.724795	0.776214	1.24627	1.0329	1.45882	0.927578	1.31147	1.1964	1.04942	0.962921	0.97893	0.756135	0.967013	0.922835	0.549223	0.811164	0.570863	0.745759	0.69208	0.633836	0.642551	0.752338
Lysopc 14:0	Lipids-Phospholipid	468.3	467.3	[M+H]+	0.596237	1.08885	0.942043	0.684009	0.887558	1.26299	0.764297	0.682712	1.16531	0.797224	1.36287	0.439325	0.530903	0.855418	1.37007	2.14016	1.0998	0.855036	0.607191	1.08672	0.946357	0.785044	1.31384	1.82864	1.41822	1.27604	1.85012	3.03739	1.85908	1.31745	3.48031	1.38262	0.900628	0.842171	0.6392	0.728577	0.347481	0.494691	0.859499	0.289778	1.23236	0.913986	0.34316	0.530054	0.47865
Lysopc 14:0 (2N Isomer)	Lipids-Phospholipid	468.3	467.3	[M+H]+	0.343158	0.662645	0.606727	0.458216	0.712642	0.976413	0.679608	0.942086	1.49256	0.940162	1.17964	0.419576	0.613078	0.797162	1.25227	1.53915	0.810878	1.06686	0.680095	1.04137	1.05884	0.923431	1.37266	1.69325	1.38626	1.55969	1.87775	3.54625	1.92456	1.24555	3.43283	1.09108	0.882266	0.855665	0.567249	0.551595	0.368539	0.431053	0.6745	0.235803	1.09322	0.982547	0.360672	0.455115	0.463526
Lysopc 16:0	Lipids-Phospholipid	496.33	495.3	[M+H]+	0.993618	1.09295	1.02228	1.08199	1.14767	0.848203	1.153	1.0952	1.02833	1.05832	1.02048	1.1895	1.19316	0.99041	0.904038	0.855362	0.999821	0.921167	0.972414	1.18965	1.20801	1.29302	1.13683	1.18753	1.15041	1.06192	1.06101	0.763839	1.00344	0.845781	0.762582	0.994967	1.05232	1.05588	1.11828	0.90706	1.03235	1.01654	1.05677	1.05912	1.05579	0.921309	1.01217	0.942097	0.969526
Lysopc 16:0 (2N Isomer)	Lipids-Phospholipid	496.33	495.3	[M+H]+	1.03975	0.886625	0.890526	1.01608	1.06835	0.994957	1.00718	0.980662	0.980079	1.05624	0.853086	1.00203	0.916033	0.832952	0.982392	0.741451	1.11793	0.817262	0.759299	0.935132	1.25384	1.22904	0.955948	0.93805	1.03497	0.895917	0.98231	0.6008	0.927709	0.75932	0.660476	0.913784	1.01156	1.074	1.07057	0.853379	1.07564	1.12211	1.08587	1.05775	1.02583	0.896233	1.04409	0.983226	1.01826
Lysopc 16:1	Lipids-Phospholipid	494.31	493.3	[M+H]+	0.650774	0.942007	1.32287	0.733315	0.725522	1.36329	0.58186	0.884056	0.873088	0.659574	1.14513	0.573168	0.666152	0.908289	1.03817	1.15743	0.800619	0.88937	1.45336	0.81008	0.612409	0.631789	0.73322	1.30102	0.903634	1.04354	1.18379	1.04634	1.52071	0.884613	1.45453	1.33095	1.15182	0.966403	0.995175	1.01799	0.344986	0.558521	0.977353	0.546656	0.942141	1.18053	0.458036	0.577958	0.632162
Lysopc 16:1 (2N Isomer)	Lipids-Phospholipid	494.31	493.3	[M+H]+	0.65702	0.948709	1.32444	0.734266	0.737878	1.36474	0.599379	0.900482	0.865358	0.662787	1.16184	0.585747	0.683268	0.921131	1.04739	1.16286	0.804653	0.915317	1.48568	0.798356	0.607827	0.615318	0.721567	1.31373	0.899898	1.04242	1.23171	1.05161	1.52687	0.887955	1.45003	1.34365	1.16308	0.971909	0.993377	1.01444	0.339486	0.547399	0.969961	0.540816	0.932876	1.17241	0.456563	0.567302	0.627398
Lysopc 18:0	Lipids-Phospholipid	524.36	523.36	[M+H]+	1.27399	1.26613	1.23683	1.23285	1.19572	1.21702	1.18343	0.945924	0.945442	1.09644	1.03047	1.09821	1.00248	0.990221	1.01555	0.860873	1.07907	0.784894	0.874709	0.990358	1.10506	1.02536	1.09786	1.03705	1.00327	0.649001	0.909821	0.510235	0.529582	0.531876	0.549562	0.548036	0.85919	1.16854	1.2501	1.19001	1.17342	1.20826	1.23063	1.23357	1.19294	1.03881	1.08393	1.15351	1.06044
Lysopc 18:0 (2N Isomer)	Lipids-Phospholipid	524.36	523.36	[M+H]+	1.25321	1.20766	1.19593	1.20795	1.21669	1.16892	1.16215	0.979868	0.953938	1.07365	0.993746	1.149	1.04895	0.982634	0.990725	0.867708	1.05076	0.823408	0.879456	0.995487	1.10612	1.0297	1.07995	0.999205	0.960554	0.508196	0.902435	0.487758	0.524183	0.514358	0.545366	0.532107	0.897756	1.45643	1.39948	1.40617	1.26671	1.29167	1.33608	1.28846	1.25317	1.13413	1.10078	1.15139	1.10333
3-N-Methyl-L-Histidine	Amino Acid And Its Derivatives	170	187.096	[M+H]+	0.430594	0.231402	0.629511	0.258648	0.602437	0.125314	0.522305	0.655649	0.774315	0.833226	0.456713	0.289984	0.665787	1.29411	0.756857	0.903453	0.48254	0.274435	0.594021	0.383495	0.363993	0.0885083	0.368979	0.568928	0.477929	0.458019	0.574888	0.42363	0.441201	0.447704	0.648602	0.134972	0.115313	2.44301	4.00472	0.462838	0.732237	1.59151	1.53146	0.428051	0.61039	4.34872	1.11255	0.626608	1.14293
Lysopc 18:1	Lipids-Phospholipid	522.35	521.35	[M+H]+	1.28701	1.12122	1.18694	1.23068	1.22086	1.20705	1.2267	1.07497	1.06612	1.23647	1.32409	1.27773	1.27415	1.09665	1.13307	1.1451	0.983424	0.689192	1.05782	1.0722	1.22319	1.0268	1.14118	1.04798	1.15817	0.876998	0.993311	1.02062	0.427658	0.849132	0.93129	0.941603	0.971146	0.955093	0.958295	0.904843	0.928666	0.999423	1.03165	1.03018	1.02087	0.987845	0.896448	1.03674	1.02464
Lysopc 18:1 (2N Isomer)	Lipids-Phospholipid	522.35	521.35	[M+H]+	1.12439	1.11501	1.18525	1.2101	1.21971	1.24379	1.06326	1.01331	0.983546	1.11266	1.0435	1.13204	1.13847	1.03518	0.93718	1.16488	1.04886	0.749044	1.01499	1.03335	1.05213	1.04455	1.09151	0.950409	1.10727	0.877623	1.04283	0.978909	0.429215	0.910981	0.919873	0.967057	0.975521	0.98149	1.00412	0.936518	0.960448	1.04044	1.05906	1.03672	1.0454	1.05456	0.903628	1.01748	1.03732
Lysopc 18:2	Lipids-Phospholipid	520.33	519.35	[M+H]+	1.00689	0.969219	0.966564	0.918508	0.954764	0.875877	0.960287	0.891466	0.990617	1.01697	0.90088	0.880996	0.991401	0.977761	0.899949	0.935576	0.825241	0.926952	0.90972	0.890742	0.902547	0.945355	0.824788	0.91434	0.911511	0.877643	0.855349	0.895107	0.948002	0.967764	0.94204	0.868224	0.962689	0.856922	0.887962	0.812254	0.439403	0.609531	0.754911	0.822878	1.09561	1.14443	0.814222	0.752762	0.750724
Lysopc 18:2 (2N Isomer)	Lipids-Phospholipid	520.33	519.35	[M+H]+	1.00698	0.943986	0.967393	1.00097	0.994715	0.94665	1.0149	0.962248	0.9318	0.950081	0.932527	0.917143	0.974874	1.01661	0.966427	1.02416	0.993334	0.98103	0.957183	0.966232	0.960802	0.973832	0.875267	0.968505	0.962439	0.890042	0.949527	0.966366	0.97546	0.976108	0.949878	0.911248	0.968612	0.875376	0.886577	0.791217	0.415072	0.571842	0.555642	0.797196	1.07161	1.07088	0.823874	0.709483	0.748647
Lysopc 20:0	Lipids-Phospholipid	552.39	551.39	[M+H]+	0.765177	0.915818	0.876822	0.743275	0.636974	0.470901	0.680888	0.992577	0.940802	0.72994	0.832443	0.610047	1.151	1.30026	1.0204	0.840292	1.11162	2.4737	1.07252	1.77061	0.924418	1.53559	1.16472	0.951331	0.876008	0.930172	1.57188	1.32062	1.96094	1.40055	1.24796	1.07205	0.871304	1.0244	0.763336	0.959992	0.607825	0.588104	0.712371	0.718632	0.476719	1.1097	0.267681	0.748675	0.86366
Lysopc 20:0 (2N Isomer)	Lipids-Phospholipid	552.39	551.39	[M+H]+	0.639331	0.909057	0.691274	0.853611	0.141629	0.308664	0.6206	0.273519	0.409033	0.748214	0.616421	0.545905	0.723415	1.37888	0.873334	0.542692	2.34546	1.91495	0.841646	0.625732	0.803511	0.424913	0.367052	1.49241	0.794367	1.08194	0.585245	0.397376	2.54712	1.41147	1.14639	1.72425	0.958275	1.50625	1.15905	1.48134	1.00692	0.882152	0.962873	1.27207	0.585241	0.981323	0.375437	0.737082	1.43143
Lysopc 20:1	Lipids-Phospholipid	550.37	549.37	[M+H]+	0.690159	0.921102	0.695091	0.68606	0.371995	0.405194	0.555266	0.703448	0.760535	0.702146	0.561331	0.578322	0.823512	1.19551	0.722741	0.639882	1.45607	1.51705	0.808226	0.856633	0.652042	0.778955	0.425039	1.0634	0.632795	1.13763	0.511069	0.967784	2.17446	0.95518	1.1035	1.46898	0.896806	1.04375	0.873722	1.01162	0.748481	0.682556	0.81775	0.914559	0.498377	1.06929	0.296205	0.748452	1.05601
Lysopc 20:1 (2N Isomer)	Lipids-Phospholipid	550.37	549.37	[M+H]+	0.685447	0.919448	0.694728	0.729803	0.405054	0.414228	0.64316	0.717132	0.758581	0.714225	0.552145	0.582816	0.825364	1.20246	0.733202	0.666643	1.42954	1.59454	0.791095	0.888041	0.678259	0.796833	0.427049	1.07109	0.635922	1.14655	0.526227	0.984655	2.2034	0.961608	1.10549	1.46073	0.884304	1.07842	0.733434	0.965378	0.672268	0.621058	0.753543	0.79629	0.4635	1.02205	0.295164	0.7506	1.03636
Lysopc 20:2	Lipids-Phospholipid	548.36	547.37	[M+H]+	0.791615	0.885398	1.02146	0.791567	0.758122	0.766795	0.92205	0.762403	1.10298	0.756337	0.974672	0.843667	1.04948	0.972657	1.11609	1.01925	0.882362	1.11232	0.926096	0.825481	0.686071	0.703912	0.564049	1.00154	0.815756	1.29652	0.725092	1.36225	1.12746	0.97268	1.05297	1.05402	1.10587	0.77912	0.566282	0.763331	0.438019	0.487196	0.75617	0.972131	0.918701	1.21449	0.433963	0.793918	0.941719
Lysopc 20:2 (2N Isomer)	Lipids-Phospholipid	548.36	547.37	[M+H]+	0.822217	0.860321	0.734132	0.549957	0.585717	0.728149	0.866326	0.778757	1.20733	0.732207	1.19102	0.873334	0.676124	0.687412	0.904824	0.747273	0.907918	0.692207	0.50747	0.939943	0.630244	0.694542	0.734907	1.03731	0.788912	0.858527	0.967978	1.07864	1.07492	0.772698	1.34669	1.1829	1.04065	1.59639	0.927854	1.14756	0.458169	0.746738	0.868416	0.745466	1.44924	0.565651	1.04912	0.795433	0.65377
Urocanic Acid	Organic Acid And Its Derivatives	139.04	138.043	[M+H]+	1.25193	0.863869	0.971281	1.14922	0.93644	0.734185	1.68227	1.10905	1.19017	1.61254	1.39736	1.37903	0.699594	1.59321	1.02215	1.43806	1.26447	0.995935	1.17817	1.25399	0.731605	1.41787	0.88017	1.37032	0.967422	0.838266	1.11878	0.854997	1.22568	1.50543	1.16402	0.987664	1.11773	0.97901	0.832897	0.640204	0.961684	0.815407	0.643425	0.937613	0.944328	0.819207	0.852071	1.05769	0.745473
Pipecolinic Acid	Organic Acid And Its Derivatives	130.08	129.079	[M+H]+	1.12851	0.350509	0.721997	0.72979	0.562882	0.585463	1.08824	0.772866	0.866989	1.45147	0.468547	0.709107	0.918977	0.604541	0.954559	0.624484	0.763934	2.30553	0.770472	0.996637	1.29795	1.33503	0.555478	0.921534	1.17196	0.730356	0.582905	0.873804	1.40637	0.65395	0.918092	0.712701	1.07325	1.48124	1.4928	0.788331	0.685111	0.754795	0.554667	0.46161	0.827201	0.843237	0.900501	1.23738	0.496396
Taurocholic Acid Sodium Salt Hydrate	Organic Acid And Its Derivatives	556.28	555.284	[M+H]+	0.931419	0.644035	0.633906	0.841064	0.824354	0.787189	0.788321	0.756772	0.938424	0.944661	0.95041	0.691412	0.68357	0.676377	0.70345	0.661334	0.650759	0.839269	0.735668	0.717033	0.872305	0.744654	0.816438	0.768677	0.791175	0.710067	0.746464	1.06099	0.799131	0.807695	0.710174	0.732741	0.74213	0.836944	0.95027	0.846645	0.93174	0.988999	0.953537	0.972064	0.896858	0.852745	0.96116	1.05263	1.06206
Deoxyadenosine	Nucleotide And Its Derivates	252	251.102	[M+H]+	0.91977	0.831602	0.93831	1.28724	1.47758	0.814112	1.1614	1.65854	1.02802	1.46156	0.904635	1.12778	1.51686	1.23484	1.48812	1.24839	1.541	1.3288	1.91432	1.13496	1.44643	1.58868	1.76892	1.47126	1.36883	1.23516	1.37221	1.21893	1.20006	1.77455	1.38099	1.35434	0.997202	1.21676	1.91491	0.972138	0.992525	1.66422	0.839668	0.644873	0.818022	0.846933	0.801735	0.667517	1.46833
D-Serine	Amino Acid	106	105.043	[M+H]+	1.95327	1.58429	3.05122	4.07973	2.41617	2.11235	1.39141	0.876489	1.13289	1.13021	1.38801	0.893625	1.63243	1.46159	1.22446	0.901028	1.35298	1.61389	1.12148	0.997761	1.0479	0.79664	1.0279	1.03636	0.96569	1.34759	0.861367	1.87409	1.02224	0.935341	1.21764	0.924376	0.607117	0.686831	0.581656	0.33236	0.412629	0.553797	0.576174	0.855112	0.707209	0.484436	0.639966	1.11951	0.558292
Tau-Methylhistidine	Amino Acid And Its Derivatives	170	169.085	[M+H]+	0.454465	0.521408	0.577597	0.657375	0.804823	0.726501	0.48394	0.294859	0.329354	0.551728	0.313225	0.395871	0.391556	0.609473	0.422907	0.457406	0.6487	0.320154	0.423586	0.396691	0.337695	0.423691	0.510526	0.519816	0.347383	0.41716	0.453644	0.38239	0.393383	0.497238	0.458238	0.298548	0.24731	1.9663	1.62423	0.762539	1.69406	1.87409	2.32778	1.1781	1.47855	1.24046	2.33163	1.32348	2.06011
N6-Succinyl Adenosine	Nucleotide And Its Derivates	384	383.108	[M+H]+	0.1693	0.239513	0.219909	0.16361	0.184167	0.161792	0.171676	0.189892	0.149402	0.230576	0.15003	0.163018	0.22338	0.218439	0.24074	0.169843	0.199267	0.26209	0.177418	0.118637	0.140646	0.179545	0.18778	0.181641	0.183868	0.16906	0.169957	0.172929	0.209768	0.177087	0.187916	0.178673	0.187006	1.4561	1.39357	0.732654	2.21691	1.9376	0.946222	0.403702	0.440611	0.473933	1.56691	0.642192	2.65903
2-(Dimethylamino)Guanosine	Nucleotide And Its Derivates	312	311.123	[M+H]+	0.144583	0.328743	0.232545	0.216068	0.244343	0.227314	0.220123	0.231877	0.20833	0.275236	0.220092	0.256189	0.251221	0.258313	0.265553	0.186333	0.211782	0.243234	0.131809	0.155597	0.14991	0.220093	0.171531	0.195459	0.20641	0.151152	0.270702	0.195289	0.21393	0.207883	0.231204	0.186445	0.22779	1.57181	1.20692	0.665233	5.02476	2.19381	1.04868	0.670341	0.389486	0.611474	1.51326	0.645577	3.6997
Beta-Alanine	Amino Acid And Its Derivatives	90	89.048	[M+H]+	0.886195	0.997226	0.900107	0.99192	1.04654	1.04639	0.981082	0.982411	1.02839	0.931386	0.935698	0.965017	0.991523	1.04817	0.905658	0.992275	0.953347	1.09175	1.08681	1.12963	1.10436	1.13751	1.11295	1.1023	1.08891	1.16975	1.11761	1.04942	1.0082	1.03539	1.06381	0.900821	0.904052	1.51359	1.30499	1.24454	1.1165	0.964391	1.12653	1.04221	0.994462	1.14361	1.00897	1.08389	0.961844
H-Homoarg-Oh	Amino Acid	189	188.127	[M+H]+	0.682754	1.57105	2.05879	0.823791	1.8066	0.911807	0.714836	1.39311	1.37874	0.764244	1.37892	1.75613	1.23887	0.822237	0.766132	0.960334	0.519075	0.948301	1.3224	1.43771	1.3866	1.23826	1.27281	1.79665	0.995429	0.968627	1.53573	2.02421	0.939829	1.06729	0.716027	1.86459	1.359	0.661859	0.847956	0.41581	0.505071	0.976122	0.838383	0.725365	1.59519	0.529368	1.80874	0.422436	1.08067
Hypoxanthine-9-Β-D-Arabinofuranoside	Nucleotide And Its Derivates	269.08	268.081	[M+H]+	0.312057	0.273576	0.165064	0.203457	0.153968	0.0550045	0.153282	0.291251	0.16179	0.117508	0.347273	0.465922	0.187018	0.132831	0.281094	0.0582582	0.0985148	0.129223	0.343398	0.212226	0.132036	0.298272	0.0582593	0.269764	0.236614	0.161571	0.392725	0.464271	0.219327	0.176243	0.32722	0.175732	0.0956865	1.46034	1.04352	2.77901	0.0928221	0.0942234	0.747966	3.3612	7.00396	0.549935	3.36195	1.66685	0.153656
Menaquinone	Vitamine	445.3	444.303	[M+H]+	0.931753	0.339124	0.26849	0.711308	0.400992	0.599812	1.06772	0.3179	0.619106	0.715746	0.412811	0.460837	0.892549	0.794692	0.437261	0.779749	0.726051	0.70222	0.497008	0.773562	1.61295	1.10699	1.00688	0.984011	1.38722	0.916519	2.29584	1.32076	1.20847	2.04719	1.38361	3.01035	1.33696	1.45765	0.549842	0.853324	1.42624	1.16825	1.11012	0.537117	0.74642	1.05784	1.26426	0.761966	0.770269
Betaine	Amino Acid And Its Derivatives	118.1	117.079	[M+H]+	9.83453	7.67561	13.5147	19.4433	12.7923	5.04462	8.05637	2.29572	2.49967	2.11019	1.17488	1.51847	1.22992	1.13253	1.51398	1.12423	1.10827	1.19415	1.08012	0.466714	0.700271	1.13522	0.972429	0.698206	0.872246	0.813134	0.812929	0.3919	0.75308	1.16493	1.26023	1.54389	1.35945	0.99508	2.79176	0.78794	0.116656	1.53392	0.484532	0.448898	0.892637	0.074039	0.991023	1.52139	0.124252
5'-Deoxy-5'-(Methylthio)Adenosine	Nucleotide And Its Derivates	298	297.09	[M+H]+	0.503775	0.603887	0.788648	0.527604	0.750767	0.556625	0.694048	0.858559	0.769484	0.692902	0.784857	0.606945	0.597176	0.740523	0.723499	0.587579	0.593548	0.772193	0.47915	0.608435	0.574216	0.669138	0.611678	0.770134	0.768261	0.622161	0.652729	0.546911	0.659206	0.580244	0.638713	0.684691	0.553742	1.35508	1.89189	0.416189	1.98423	1.29045	1.00824	0.462123	1.10125	0.475832	2.41257	0.925087	0.982338
Guanine	Nucleotide And Its Derivates	152	151.049	[M+H]+	0.487389	0.570206	0.514314	0.413123	0.367252	0.597571	0.619963	0.539624	0.36775	0.430214	0.501389	0.577346	0.765775	0.464198	0.510611	0.325321	0.574145	0.68228	0.548452	0.588535	0.48622	0.531666	0.445609	0.616278	0.473394	0.687841	0.532272	0.650385	0.389343	0.388675	0.864821	0.366635	0.648646	0.642054	0.638995	1.00859	0.689527	0.64424	1.43839	1.34454	1.11341	0.744876	1.43732	0.894575	0.887269
Deoxycytidine	Nucleotide And Its Derivates	228	227.091	[M+H]+	1.38259	0.710338	1.20501	1.13807	0.660612	0.733385	0.582442	0.893045	0.473916	0.3506	0.51533	0.191109	0.474971	0.431207	0.475571	0.463349	0.437428	0.841957	0.625326	0.697235	0.773889	0.826715	0.749667	0.305906	1.09787	1.12884	0.449581	0.253076	1.12792	0.90314	0.835941	0.346078	0.626018	0.933948	0.988014	0.805327	1.33404	0.877466	0.753601	0.812793	0.437621	0.529613	1.2758	0.460747	0.811175
Sarcosine	Amino Acid	90	89.048	[M+H]+	1.46286	1.46731	1.45366	1.79828	1.30957	1.89399	1.42559	0.813664	1.4833	1.33525	1.72051	1.96833	2.0686	1.816	1.87674	2.10866	1.87241	1.61026	1.52471	1.98061	1.65574	1.81574	2.07069	1.86942	1.64843	1.81061	1.95569	1.21286	1.02461	0.939747	1.37738	1.12636	1.22401	0.800816	0.562304	0.526956	0.683505	0.755206	0.612006	0.575456	0.587847	0.417526	1.04727	0.495575	1.00418
3-Aminoisobutanoic Acid	Amino Acid And Its Derivatives	104	103.063	[M+H]+	0.817215	0.814456	1.05906	0.732534	0.56547	0.626012	0.526673	0.785337	0.820715	0.681769	0.833382	0.624759	0.622314	0.722291	0.757485	1.17582	0.921423	0.953476	1.07939	0.616999	0.329763	0.711113	0.641905	0.632525	0.740515	0.864683	0.524512	0.870666	1.02782	1.19855	0.798179	0.763313	1.01583	0.640738	0.986096	0.724591	1.46259	0.6899	0.516973	0.653147	0.586224	0.532956	0.533289	0.594993	0.878402
D-Norvaline	Amino Acid	118	117.079	[M+H]+	1.27612	1.30208	1.75663	1.72247	1.55533	1.47839	1.45676	1.21536	1.64152	1.00282	1.26292	1.60654	1.0692	1.13172	0.826517	1.28528	0.993705	0.958061	0.883304	1.11269	0.780571	0.837287	1.26205	0.982758	1.02735	1.04429	0.822342	0.965389	0.793151	1.15637	0.987082	0.985829	0.705343	0.77591	0.571106	0.974668	0.995686	0.48294	0.606483	0.738045	1.01917	1.33566	0.98843	0.703141	1.07857
Trans-Citridic Acid	Organic Acid And Its Derivatives	175	174.016	[M+H]+	1.2358	0.934253	1.34725	0.84163	1.68336	1.49673	0.995717	0.941973	0.892602	1.83656	1.35539	1.08434	1.21798	0.647344	0.80566	1.17879	0.587484	0.901586	0.754322	0.777459	0.989067	0.98896	0.519768	1.32855	1.39003	1.31295	1.2835	1.18866	1.10395	1.17761	1.09616	2.67197	1.01174	2.24315	1.30822	1.27294	1.66113	1.26436	1.19742	1.63564	0.972238	1.86684	1.479	1.5645	1.36933
1-Methylguanidine	Organic Acid And Its Derivatives	74	244.095	[M+H]+	0.139108	0.0838664	0.168123	0.358502	0.292056	0.162121	0.0570035	0.0538846	0.110041	0.0404377	0.0896304	0.0551962	0.0789826	0.116354	0.0605418	0.0339978	0.030293	0.0488001	0.0834159	0.0264943	0.0318364	0.00845944	0.0367176	0.0440629	0.029362	0.0834104	0.019167	0.0342756	0.0344545	0.0328916	0.0344003	0.0227187	0.0343814	0.577285	0.53161	0.365984	1.69013	3.7599	1.01296	0.992799	0.363663	0.0861891	0.936563	0.793098	1.87967
Aminophylline	Others	181	360.129	[M+H]+	0.12903	1.38654	4.93813	0.307362	1.57904	1.60346	5.65054	3.70413	0.0887469	6.9338	3.88745	0.00842389	4.39255	0.00630208	0.00912606	1.89825	2.17623	6.12249	0.00719372	0.014991	2.77332	2.13538	0.327	0.411693	5.29696	0.442728	1.06008	5.79592	0.00255262	0.0850237	0.00979682	0.00633077	0.00569837	0.0431744	0.0286866	0.0147063	0.185661	1.2184	0.022526	0.0154378	0.0292573	0.294459	0.123735	0.0103161	0.256388
6-Phosphogluconic Acid Trisodium Salt	Sugar Acids And Derivatives	274.3	341.971	[M+H]+	0.913156	1.16969	0.935619	1.09077	0.817526	0.77115	1.09189	0.730136	1.80475	0.88711	0.783518	0.749855	0.557249	1.12189	0.854445	0.770893	0.907154	0.867392	0.852707	0.677648	0.793879	0.809894	0.795819	0.711132	0.888808	0.834263	0.961672	1.06449	0.745645	0.969478	1.1682	0.858921	0.859453	0.932366	1.058	1.04815	0.798027	0.93371	0.89645	0.966038	1.00933	0.953372	0.816569	1.04794	1.03676
D(-)-Threose	Carbohydrates	121.042	120.042	[M+H]+	0.981001	1.41695	1.35697	1.69431	0.851315	1.46549	0.948139	0.660258	1.61376	0.928222	0.484879	0.760141	0.607833	0.605196	0.869973	0.83045	0.584594	0.70592	1.00123	0.641882	0.947171	1.3724	0.588724	0.916614	1.01698	0.679901	0.434576	0.729648	0.692417	0.614295	0.390755	0.596254	0.832704	0.633091	0.606794	1.11103	0.849712	0.808142	1.03701	0.658899	1.0194	0.949024	0.921969	2.47005	1.13938
Cocamidopropyl Betaine	Others	343.1	342.288	[M+H]+	0.857773	0.983813	0.910545	1.02937	1.00549	0.985871	1.13336	0.897192	1.13142	1.32952	0.904819	0.919044	0.948504	1.02229	0.986664	1.08875	0.774537	1.19112	0.771101	0.826246	0.838815	0.947271	1.11323	0.839465	0.873491	0.864115	0.844245	0.818832	0.805988	0.777198	0.80314	0.850056	0.767012	1.15509	1.15944	0.904504	1.1164	0.913022	1.01942	0.907949	0.781567	0.829777	1.21783	1.04765	0.872012
Phthalic Anhydride	Others	149	148.016	[M+H]+	0.750175	0.713617	0.667046	0.676604	0.711685	0.653096	0.667045	0.894833	0.741778	0.677987	0.647736	0.682458	0.685893	0.668205	0.687437	0.71797	0.75442	0.783364	0.832488	0.912396	0.911782	0.883351	0.892765	0.902368	0.918237	0.872823	0.908105	0.979532	0.999269	0.858632	0.810534	0.83	0.935911	0.965497	0.888797	0.850203	1.16071	1.01275	1.20804	1.19479	1.1876	1.04183	1.28533	1.34222	1.05041
Dl-Glutamine	Amino Acid And Its Derivatives	147.069	146.069	[M+H]+	1.0752	1.42648	1.42964	1.06519	1.57091	1.46388	1.204	1.05622	1.01878	1.23538	1.13145	1.39481	1.07581	1.25874	0.968307	0.996976	0.60901	0.970285	0.899714	1.29403	1.03156	0.744041	0.994675	1.03191	0.789623	0.919356	0.753204	1.013	0.866064	1.2073	1.07002	0.934086	0.825646	0.859782	0.688772	0.760815	0.55094	0.640804	0.674635	0.931921	1.14541	0.82059	0.99194	0.741991	0.803544
Cholesterol	Others	387.1	386.355	[M+H]+	0.644783	0.908734	0.808506	0.958321	0.563929	0.636403	1.01015	0.490889	1.42623	0.71091	0.647668	0.548456	0.410344	0.917085	0.689549	0.64538	0.679389	0.708254	0.641441	0.510866	0.601423	0.947479	0.531581	0.574423	0.716366	0.583401	0.752878	1.3547	0.55607	0.739906	0.990249	0.646183	0.655769	0.958805	1.82176	1.87233	0.648373	0.980063	0.813293	1.09514	0.955315	0.996712	0.666291	1.28523	0.939097
Punicic Acid	Lipids_Fatty Acids	279.3	278.225	[M+H]+	0.347269	0.488954	0.651688	0.565114	0.41818	0.393792	0.427635	0.448106	0.42768	0.490109	0.376001	0.388329	0.640138	0.477725	0.355058	0.537879	0.358816	0.588204	0.88746	0.380142	0.502802	0.388169	0.364018	0.632003	0.529279	1.84918	0.538245	1.0682	0.591871	0.703576	0.856875	0.579905	0.756433	1.03538	0.423689	1.96323	1.33491	0.352082	1.01586	1.61278	0.451912	2.09293	0.722403	0.631789	2.25199
4-Aminoindole	Indole Derivatives	133.1	132.069	[M+H]+	1.04006	0.389405	0.98614	0.7202	0.877843	2.94215	1.0538	0.951434	0.827692	1.1959	1.19329	1.12047	1.19509	0.565935	0.36864	1.32836	3.86004	1.49937	1.01084	2.79007	0.938948	3.08458	0.818934	1.66996	1.91009	0.875187	1.68234	2.10067	1.58646	1.5754	3.2992	1.30356	1.83917	0.368957	1.12263	1.02132	0.785048	0.982395	0.720921	0.797927	0.818008	1.04574	0.700242	0.805473	1.1662
Lysopc 17:0	Lipids_Glycerophospholipids	510.1	509.348	[M+H]+	0.742367	0.789341	1.05793	0.767432	0.636718	0.529303	0.677229	0.861719	0.957418	0.906491	1.09892	0.83905	1.07454	1.16379	0.739796	1.03265	0.858466	1.47153	1.37181	1.19586	0.864435	0.900377	0.741268	0.939467	0.864361	1.23823	1.12681	1.5204	1.44921	1.45763	2.36321	1.76715	1.12069	0.636448	0.476259	0.745684	0.390325	0.442679	1.00305	0.564153	0.958305	0.947008	0.422905	0.580685	0.842457
6-Methylmercaptopurine	Nucleotide And Its Derivates	167.1	166.031	[M+H]+	0.706492	1.0197	0.959947	0.766725	0.834095	0.780926	0.809408	0.744184	0.728364	0.90452	0.888479	0.815224	0.82502	0.803991	0.822446	0.889358	0.810994	0.782001	0.707697	0.726156	0.766747	0.647642	0.763554	0.746272	0.88887	0.746925	0.751534	1.10281	0.813595	0.959986	1.19498	0.96341	0.851797	1.26452	1.1399	1.34237	1.61045	0.887752	1.25226	1.14507	0.932196	1.32861	1.28536	0.762527	1.37092
N-Formylmethionine	Amino Acid Derivatives	178	177.046	[M+H]+	1.57948	1.3253	4.75717	0.761346	1.91544	0.861195	1.0901	1.4503	0.901436	0.954044	0.288659	1.80325	0.802639	0.65323	1.39284	0.97906	1.959	1.12598	1.62269	0.897476	0.979756	2.09422	1.29796	2.70769	0.82654	2.25508	1.64893	1.87139	0.979956	1.12449	1.11278	1.36834	0.726559	0.580863	0.506526	0.451677	0.604946	0.584533	0.961401	0.68292	1.87233	0.676776	0.602803	1.25552	0.676849
Methoxyindoleacetic Acid	Indole Derivatives	206.1	205.074	[M+H]+	1.2473	1.7185	1.57094	1.17716	1.28312	1.44282	1.23634	1.24106	1.04997	1.15522	1.25633	1.17253	0.995688	1.15478	1.04442	1.15463	1.09055	1.05058	1.15099	0.985057	0.891772	1.06575	1.16536	1.1824	1.01147	1.17695	1.34172	1.34621	1.04493	1.39209	1.55091	1.37504	0.942165	0.958284	0.731717	0.977112	0.569831	0.383299	0.663722	0.845589	1.02839	1.02514	0.737603	0.662159	0.730392
Sn-Glycero-3-Phosphocholine	Cholines	258.2	257.103	[M+H]+	1.73009	1.64076	3.03664	2.59047	3.24764	1.90611	1.24562	0.399171	1.31197	1.10473	2.33774	0.721	0.748303	0.950469	1.33501	1.33703	1.72065	1.38478	2.05585	1.76948	0.937967	1.09427	0.635743	1.81774	1.32022	1.06993	2.48308	0.654697	0.929367	1.0101	0.989181	1.16038	0.804326	0.330408	0.553512	0.807904	0.0434839	0.506689	0.404147	1.1764	0.476272	0.671482	0.607152	0.443987	0.222366
10-Formyl-Thf	Others	474.2	473.166	[M+H]+	0.178115	0.180025	0.366357	0.210569	0.276517	0.274806	0.167462	0.180156	0.153278	0.25113	0.354417	0.151338	0.259957	0.235493	0.486313	0.354813	0.217548	0.239572	0.504642	0.237057	0.295588	0.204821	0.317748	0.245323	0.268185	0.118397	0.194398	0.172974	0.33568	0.197811	0.662043	0.910819	0.928003	0.593643	0.631414	0.139531	0.488788	1.44931	2.85008	0.181763	0.530916	0.189309	0.512577	0.882464	0.665872
Mag (18:2)	Lipids_Glycerolipids	355.1	354.277	[M+H]+	0.197988	0.079674	0.137818	0.185867	0.791353	0.849434	0.232957	0.579907	0.519805	0.438552	0.259522	0.109204	0.117119	0.358357	0.204661	0.184635	0.209924	0.388694	0.369957	0.2064	0.121524	0.451924	0.490078	0.483798	0.784945	0.33944	0.415729	0.571682	0.570389	0.241724	0.390093	0.75351	0.728521	0.60363	0.177861	1.0354	0.0412888	0.382427	0.381911	1.6765	1.14171	0.346264	1.39623	0.293451	0.525693
Octadeca-11E,13E,15Z-Trienoic Acid	Lipids_Fatty Acids	279.2	278.225	[M+H]+	0.640982	0.635166	0.605027	0.64447	0.656374	0.642088	0.61237	0.98862	0.815831	0.688914	0.635696	0.652457	0.67608	0.697601	0.728302	0.748828	0.793978	0.922932	0.918179	0.931467	0.90418	0.885806	0.947407	0.958005	0.961059	0.949787	0.995863	1.09959	1.10528	0.993676	0.88877	0.961923	0.979978	1.0955	0.878691	0.851436	0.920966	0.932541	1.01078	1.14671	1.00201	1.1749	1.2604	1.34305	1.23241
N-Lauryldiethanolamine	Others	275.1	273.267	[M+H]+	1.08012	1.26444	1.0444	1.14958	0.994264	0.854872	1.18921	0.918915	2.28924	0.944449	0.765297	0.808643	0.653278	1.08049	0.952702	0.805922	1.06837	0.923763	0.967145	0.797407	0.803324	0.936359	0.98563	0.891694	0.880227	0.884433	1.0784	1.0401	0.89925	0.967517	1.08024	0.971001	0.927074	0.686077	1.07373	1.08291	1.09928	0.716026	1.44744	1.7477	1.46387	1.27989	1.3665	1.43128	1.34504
P-Aminobenzoate	Benzoic Acid Derivatives	137.3	137.048	[M+H]+	0.440477	0.685166	0.53925	0.542722	0.616542	0.421639	0.470964	0.454576	0.32734	0.330234	0.287217	0.48341	0.503917	0.598697	0.59432	0.352306	0.36039	0.317597	0.572167	0.375082	0.180784	0.480213	0.201713	0.413621	0.338712	0.372677	0.514376	0.372497	0.337991	0.634757	0.414707	0.552513	0.274826	0.405854	1.28445	0.36749	0.989865	1.13437	1.09824	0.639871	0.4902	0.559568	1.52479	0.522428	1.18383
Digitoxigenine	Others	375	374.246	[M+H]+	0.271467	4.79684	0.396381	1.98248	0.317427	0.764526	0.520569	1.3455	1.85977	0.274138	5.61868	0.212309	0.263277	0.620741	0.95965	3.99934	0.61767	0.877324	0.980665	1.59735	0.194824	0.503511	0.382579	0.418139	0.171799	0.852526	0.0906968	0.0660119	0.543623	1.31431	1.35039	0.307876	0.228987	0.506913	0.439235	0.231753	0.415089	0.337702	1.27327	0.207362	0.299026	0.199665	0.293273	0.169233	0.151854
Indole	Indole Derivatives	118	117.058	[M+H]+	1.15524	1.50927	1.34331	1.03879	1.26401	1.32043	1.0914	1.12223	1.07585	1.0673	1.14559	1.15833	1.0532	1.09681	1.0007	1.1373	1.10637	1.3267	1.33116	0.925413	0.90815	1.08356	1.1608	1.16782	0.962594	1.21349	1.22242	1.28324	0.984215	1.26053	1.41097	1.16451	0.801182	0.900155	0.669462	0.871498	0.550486	0.346305	0.554895	0.738338	0.922663	0.913458	0.665376	0.583318	0.666539
Isoquinoline	Alkaloids	130.1	129.058	[M+H]+	0.607263	0.828608	0.710863	0.391936	0.453954	0.388897	0.564516	0.549948	0.442334	0.413455	0.442219	0.486655	0.300912	0.469028	0.453704	0.600267	0.562997	0.736008	0.600182	0.555198	0.551202	0.515373	0.504693	0.864715	0.430957	0.330905	0.566939	0.396956	0.157582	0.47536	3.50617	0.444719	0.46626	0.627295	3.76717	0.523252	3.38925	2.6654	1.06057	0.715981	0.40822	0.66825	1.1095	0.518354	0.558695
Piperidine	Alkaloids	86.1	85.0891	[M+H]+	0.747516	1.2014	1.21049	0.746646	0.891734	0.749878	1.12699	0.97353	1.01853	0.861952	0.981941	1.07667	0.919456	0.96373	0.642658	1.09675	0.788397	0.783703	0.771943	0.924882	0.710356	0.631232	0.972886	0.840505	0.752448	0.938804	0.710041	0.840923	0.752433	1.01803	1.07168	0.815118	0.700178	0.89637	0.875491	1.49284	1.01132	0.679555	1.15145	1.35404	1.2128	1.66932	0.909591	0.765304	1.38168
5-Aminolevulinate	Organic Acids	132.1	131.058	[M+H]+	0.968056	0.869527	0.932514	0.97671	1.01415	0.992095	0.989898	1.07066	1.04185	1.08728	1.05742	1.02914	1.02636	1.04058	1.04463	0.982717	1.06437	1.05515	1.04192	1.02262	1.07399	1.01566	1.04461	1.05722	1.06389	1.05218	1.05117	1.0439	1.0605	1.05232	1.00872	1.08712	1.08399	1.0526	1.06253	0.865481	0.922467	1.01615	0.97732	1.01248	0.98437	0.821397	1.08027	1.0216	0.925438
Kinetin 9-Riboside	Phytohormones	348.1	347.123	[M+H]+	1.98287	2.44106	5.6578	3.01053	2.48252	5.48949	2.6533	1.76009	0.824508	0.735342	2.21869	2.50726	1.83627	0.854495	1.86263	1.63409	2.24705	1.89643	1.13724	2.12828	0.990994	1.33092	0.64285	1.06439	0.409329	0.501971	1.5038	2.43778	0.497127	0.74202	0.163071	0.395086	0.158014	1.20847	0.990977	0.447054	1.87984	0.723759	2.43123	0.193565	1.64788	0.361036	0.827835	0.83556	0.760861
Succinyladenosine	Nucleotide And Its Derivates	384.115	383.108	[M+H]+	0.177745	0.220079	0.214398	0.179782	0.197978	0.161925	0.149431	0.188964	0.145382	0.214034	0.152319	0.155816	0.182052	0.199391	0.22327	0.155856	0.196481	0.248159	0.151494	0.112594	0.124721	0.177356	0.1961	0.170461	0.171019	0.145886	0.162448	0.157994	0.164154	0.175853	0.179454	0.165932	0.158707	1.36719	1.31517	0.742193	2.13702	1.78669	0.898823	0.428741	0.436416	0.44798	1.53313	0.632179	2.54959
Hydroxyphenethylamine	Others	138.091	137.084	[M+H]+	0.260865	0.283318	0.461764	0.289611	0.311242	0.251054	0.318442	0.213796	0.304925	0.41194	0.290761	0.379702	0.24061	0.205429	0.193688	0.242678	0.236459	0.2194	0.302336	0.233122	0.145602	0.335887	0.305183	0.30231	0.391647	0.33813	0.189726	0.224269	0.15314	0.205012	0.334332	0.155532	0.192626	2.13587	0.973689	2.01289	0.587289	0.861113	0.96783	1.45709	1.57686	0.605957	0.744263	0.856352	1.49968
N-Hydroxy Tryptamine	Tryptamine Derivatives	177.2	176.095	[M+H]+	1.61118	1.21453	4.39515	0.717032	1.69643	0.957075	1.07113	1.28158	0.885332	0.969254	0.271554	1.86693	0.88364	0.662354	1.39575	0.939088	1.77588	1.20592	1.9249	0.857668	1.0073	2.61924	1.24921	2.59876	0.894932	2.67018	2.06697	1.79309	1.23643	1.11196	1.73923	1.65685	0.974248	0.20148	0.539216	0.66944	0.0129029	0.278179	0.518018	0.511597	1.39492	0.770237	0.457874	0.772299	0.391753
Trans-Zeatin 9-O-Glucoside	Phytohormones	382.1	-	[M+H]+	0.0923878	0.185984	0.0680025	0.103523	0.0881635	0.13154	0.11414	0.0711303	0.0620044	0.228362	0.139836	0.137363	0.17336	0.152539	0.0964407	0.0632632	0.181854	0.362896	0.146854	0.0554898	0.0928005	0.162371	0.0928581	0.155482	0.100752	0.0835423	0.120682	0.104959	0.0647901	0.148861	0.0855048	0.0590082	0.0522652	0.347374	1.65067	0.433725	0.775447	3.09558	0.401169	0.341337	0.259969	0.217852	1.92593	0.326508	0.731549
Adenosine O-Ribose	Nucleotide And Its Derivates	400.2	-	[M+H]+	0.370817	0.894131	0.538031	0.319214	0.625719	0.383303	0.220269	0.457066	0.49602	0.532167	0.422373	0.602733	0.336683	0.328208	0.290768	0.545211	0.443724	0.434291	0.485792	0.395097	0.342452	0.224789	0.40856	0.673852	0.346298	0.38534	0.411522	0.48496	0.366706	0.363973	0.227587	0.294536	0.396964	1.84644	1.69698	0.829126	2.671	1.3524	1.17153	0.650001	0.744425	0.848087	1.65623	0.750986	2.41896
N-Sinapoyl Hydroxycoumarin	Coumarins	369.119	-	[M+H]+	0.32422	0.604708	0.521213	0.420445	0.278998	0.101685	0.223716	0.097805	0.100367	0.261799	0.557267	1.01116	0.23189	0.31602	0.0677104	0.191079	0.817723	0.79515	0.271334	0.41773	0.937775	0.733535	1.09432	0.304316	0.668207	0.643603	0.878542	0.705589	0.102446	1.31032	0.133818	0.201443	0.822397	0.0966745	0.737686	0.0744294	0.872206	1.87729	0.644334	0.249484	1.96548	0.419112	3.79042	0.350795	0.522404
L-Allo-Isoleucine	Amino Acid And Its Derivatives	132	131.095	[M+H]+	1.01929	0.906892	0.961375	1.01989	1.0505	0.999494	1.02979	1.049	1.08741	1.05992	1.03111	0.958137	1.02776	1.00653	1.03064	0.961145	1.0716	1.08543	1.03574	1.0042	1.08937	1.02076	1.00761	1.05365	1.02121	1.01845	0.988408	1.03671	1.04054	0.987721	0.948772	1.02763	1.03021	0.937102	0.945942	0.887798	0.943774	0.940708	0.936824	0.94766	0.993351	0.853191	0.99344	0.998039	0.977788
Azoxystrobin Acid	Others	390.4	389.101	[M+H]+	0.671574	0.6835	0.701959	0.995091	1.04203	0.621854	0.778785	0.684177	1.06791	0.716871	0.626027	0.627667	0.473673	0.75644	0.686835	0.601788	0.8371	0.650944	1.18909	0.564283	0.629393	1.1089	0.962535	0.697589	0.61604	0.631708	0.74369	0.736612	0.672622	0.772205	0.800712	0.7238	0.690508	1.12826	1.4593	1.52007	0.995885	0.81596	1.04746	1.31312	0.774164	0.554564	0.681835	1.21037	1.18006
Lysopc 16:2 (2N Isomer)	Lipids_Glycerophospholipids	492.3	-	[M+H]+	1.57075	0.861222	3.25564	0.918177	1.08593	1.40306	0.574273	0.885282	1.02303	0.886876	1.12374	0.652328	0.958962	0.991649	0.849225	0.958178	0.74553	1.04073	1.62665	0.651274	0.388983	0.518445	0.48109	1.08914	0.821879	1.58495	0.909084	0.659947	1.20094	0.544938	1.3985	1.23113	1.7292	0.606719	0.688957	0.264273	0.213507	0.323914	0.837348	0.354726	1.14311	0.828005	0.401606	0.65038	0.612268
Lysopc 18:3 (2N Isomer)	Lipids_Glycerophospholipids	518.2	-	[M+H]+	0.564087	0.907079	0.720638	0.570218	0.341748	0.851165	0.55218	0.81741	0.699818	0.709465	0.555197	0.330886	0.75937	0.661445	0.797522	0.915234	1.14735	1.19325	0.661187	0.711642	0.511171	0.715104	0.343036	0.973429	0.637126	1.59918	0.551611	0.440516	1.04832	0.890127	1.92609	0.693919	1.05025	1.2126	0.626043	1.26819	0.200875	0.29609	0.744226	0.212428	1.5154	1.00605	0.444709	0.81819	0.486591
Lysopc 15:0	Lipids_Glycerophospholipids	482.3	-	[M+H]+	0.820184	0.880373	0.965177	0.660822	0.8379	0.726587	0.813825	0.836089	1.09258	0.781251	1.21959	0.691613	0.793878	1.08852	0.557676	1.39042	0.879651	1.3572	1.14549	1.55738	0.906208	0.971507	1.08661	1.26427	1.00814	0.917724	1.98827	2.58074	1.19956	1.30595	3.47243	1.49098	0.902852	0.864232	0.51041	0.849521	0.437173	0.406507	1.24018	0.541229	1.19831	1.01108	0.423116	0.468653	0.653791
Lysope 18:2 (2N Isomer)	Lipids_Glycerophospholipids	478.6	-	[M+H]+	0.481331	0.573604	0.705829	0.774569	0.815315	0.64154	0.754662	0.726927	1.04957	0.642209	0.479619	0.377416	0.46098	0.834099	0.839825	0.546656	0.700619	0.773624	0.706569	0.436514	0.4319	0.548499	0.448355	0.702413	0.778979	1.34053	0.523732	0.521734	0.73835	0.588796	1.07627	0.553855	1.1487	1.35186	0.858729	1.30032	0.289324	0.577286	0.566933	0.959146	1.35552	1.06206	0.919522	0.736175	0.769705
14,15-Dehydrocrepenynic Acid	Lipids_Fatty Acids	277.216	-	[M+H]+	0.572225	0.544753	1.04181	0.715393	0.534171	0.445617	0.41804	0.693027	0.462212	0.38271	0.385234	0.435702	0.408002	0.598342	0.548716	0.688514	0.428803	0.598447	1.82781	0.460793	0.57597	0.545045	0.374737	1.10389	1.25211	0.751306	0.571122	0.535477	0.577425	0.43758	0.383804	0.702474	0.544992	1.7016	0.943026	1.00901	2.52335	1.59912	0.446343	0.676084	0.299864	1.16065	0.808295	0.709008	1.51028
Pc 19:2/16:0	Lipids_Glycerophospholipids	772.1	-	[M+H]+	0.443753	0.478231	0.504124	0.451427	0.438277	0.450897	0.373564	1.03526	0.918719	0.799744	0.972842	0.714872	0.747126	0.807261	0.786455	0.992155	0.720568	1.12308	1.06607	0.935829	0.791044	0.818305	0.8338	0.848952	0.915617	0.963425	0.966356	1.28881	1.16444	1.20183	1.0936	0.981378	0.909155	0.694755	0.539113	0.708347	0.436957	0.449909	0.495695	0.58543	0.591761	0.797137	0.52145	0.635696	0.911842
Lysopc 18:3	Lipids_Glycerophospholipids	518.3	-	[M+H]+	0.811728	0.830409	0.929451	0.86123	0.861611	0.649985	0.828085	1.00898	0.983687	0.881426	1.06169	0.972469	0.967359	1.02225	0.932433	1.10058	0.901033	0.997574	1.0955	0.967128	0.88087	0.90698	0.944431	0.958001	0.982859	1.01303	0.99657	1.13434	1.07133	1.11024	1.12043	1.01889	0.92946	0.82207	0.845479	1.17264	0.861116	0.915137	1.02141	1.05175	0.909226	1.00362	0.812669	0.839483	1.01023
Lysope 18:1 (2N Isomer)	Lipids_Glycerophospholipids	480.5	-	[M+H]+	0.389241	0.672105	0.560812	0.707554	0.47988	0.55482	0.657392	0.53519	0.85722	0.514796	0.389189	0.274617	0.333432	0.716732	0.680346	0.530414	0.77593	0.814741	0.725849	0.476083	0.45962	0.451935	0.40742	0.555623	0.497767	0.939972	0.457323	1.39358	0.948842	0.649746	1.08595	0.676221	0.970765	1.36216	0.778587	1.87023	0.509546	0.607933	0.698405	0.604621	0.733817	0.935732	0.777667	0.830497	1.06059
Lysopc 20:4	Lipids_Glycerophospholipids	544.4	-	[M+H]+	0.634171	0.66704	0.610384	0.60147	0.566841	0.576693	0.548661	0.923297	0.881845	0.734585	0.687043	0.656819	0.695842	0.814394	0.822373	0.757543	0.822438	0.968905	0.890845	0.795478	0.722417	0.803129	0.685165	0.920375	0.825013	0.969222	0.764207	0.923418	1.17618	0.973812	0.959483	0.960468	0.92708	0.851785	0.667398	0.747532	0.593164	0.711956	0.697947	0.719452	0.689707	0.748869	0.568655	0.891272	0.928246
Mag (18:1) Isomer1	Lipids_Glycerolipids	357.2	-	[M+H]+	0.553627	0.518611	0.527236	0.610177	0.653808	0.601428	0.684916	0.910377	1.02915	0.715943	0.438445	0.563005	0.535875	0.67467	0.640908	0.656055	0.82196	0.718167	0.798979	0.654985	0.698347	0.830251	0.940188	0.815961	0.654744	0.725152	0.684815	1.01774	0.763609	0.823725	0.68964	0.83415	0.715717	1.23891	0.954829	0.663523	0.964797	0.896737	0.858563	0.881439	0.849547	0.90079	0.900615	1.23748	1.17447
Mag (18:1) Isomer2	Lipids_Glycerolipids	357.2	-	[M+H]+	0.544444	0.547635	0.576415	0.564193	0.53591	0.597592	0.639787	0.926683	0.995832	0.706558	0.452005	0.520964	0.550727	0.7133	0.566699	0.6531	0.749283	0.714476	0.815479	0.769094	0.826887	0.782121	0.998936	0.785392	0.70523	0.801008	0.735653	0.958655	0.828224	0.874005	0.731575	0.826691	0.675446	1.0646	0.809405	0.54928	0.709424	0.756815	0.699949	0.83983	0.729903	0.712918	0.945671	1.02324	1.23707
9-Hydroxy-(10E,12Z,15Z)-Octadecatrienoic Acid	Lipids_Fatty Acids	295.2	-	[M+H]+	0.472361	0.497008	0.570005	0.471139	0.267564	0.323132	0.321557	0.539425	0.734489	0.448117	0.33221	0.447556	0.460547	0.441534	0.457111	0.745773	0.62384	0.726701	0.780882	0.340841	0.636305	0.561184	0.496445	0.720094	0.513907	8.15227	0.53997	1.86281	0.840921	0.809461	1.80672	0.721551	0.734869	0.878756	0.413492	0.633521	4.67705	0.32107	0.326638	1.42815	0.428963	1.69799	0.759992	0.726464	2.75122
Caprolactam	Lactams	114.092	113.084	[M+H]+	0.822227	0.854467	0.910719	0.961503	0.952771	0.929457	0.958665	0.942137	0.9124	0.994718	1.04752	0.99803	1.02712	0.9746	0.955669	0.966996	0.99191	0.839243	0.87248	0.874237	0.824215	0.833574	0.773932	0.755879	0.746328	0.732747	0.751294	0.763792	0.744501	0.714977	0.767223	0.765736	0.706277	1.05744	1.1548	0.884349	1.04759	1.53428	2.49992	2.71997	1.5097	0.944913	1.01975	0.826394	0.508044
2-Hydroxycinnamic acid	Phenylpropanoids and polyketides	165.054	164.047	[M+H]+	0.594222	1.68101	0.767815	0.641227	0.923135	0.613252	1.06375	1.00042	0.91605	0.692205	1.61541	0.773053	0.783796	0.334654	0.625765	0.586603	0.859012	0.578603	0.686624	0.379921	0.567772	0.748259	0.578532	0.90121	0.602578	1.04901	0.753358	0.406215	0.848855	0.576403	0.790931	0.969604	0.403305	0.926657	1.71002	1.11004	3.12399	1.7251	0.815972	0.660401	1.07943	1.11783	1.65206	1.29666	1.20738
D-Pyrrolidine-2-Carboxylic Acid	Amino Acid	116	115.063	[M+H]+	0.35677	0.406507	0.512848	0.327408	0.539301	0.84178	0.624485	0.839935	0.965694	0.691409	0.823023	0.881657	0.848937	0.794447	0.583797	0.71937	0.586374	0.575447	0.579794	0.622567	0.615654	1.69478	0.645417	0.778947	0.560807	0.705324	0.367574	0.435576	0.491359	0.735226	0.800706	0.399802	0.561378	1.0158	1.45141	0.809195	0.476135	0.932526	0.671521	0.892915	0.683223	1.00062	1.17838	1.57631	1.86911
L-Carnosine	Amino Acid And Its Derivatives	227.2	226.107	[M+H]+	0.78784	0.730705	1.06932	1.08908	1.11194	1.15	1.38127	1.20911	1.2152	1.03639	1.49131	1.81517	2.34799	2.48606	1.69866	1.69991	1.9722	1.5979	1.95496	2.4338	1.37704	2.10521	1.10877	1.8857	1.20866	1.76468	1.44303	1.9935	1.69488	2.51422	2.74041	1.92639	1.68217	0.730744	0.845349	0.495633	0.463214	0.673593	0.412324	0.600317	0.587963	0.472579	0.737929	1.34309	1.97485
2-Hydroxy phenylalanine	Organic acids and derivatives	182.081	181.074	[M+H]+	0.808013	1.20942	1.00547	0.952909	1.10088	0.980131	1.02234	1.03981	1.08301	1.11379	1.1633	0.939224	1.05115	0.877084	0.976848	1.00837	0.990272	0.96091	0.980987	0.982603	0.978153	0.904716	1.02623	1.11043	1.01159	1.19101	0.926662	0.948738	1.05862	1.2327	1.25377	1.22362	1.09709	0.698232	1.00074	1.28694	0.931496	0.757335	0.685837	0.849082	0.980804	1.12582	1.04819	0.701434	0.971383
trans-3-Indoleacrylic acid	Organic acids and derivatives	188.071	187.063	[M+H]+	1.09217	1.08111	1.11424	1.10923	1.15311	1.11001	1.09937	1.0752	1.06662	1.05004	1.09687	1.04896	1.02824	1.06667	1.01625	1.05927	1.06181	1.04125	1.10293	1.02902	0.986602	1.02494	1.08538	1.0361	1.00265	1.05391	1.0585	1.09689	1.02221	1.09986	1.05183	1.07208	0.954092	0.961472	0.858781	0.950662	0.775807	0.583207	0.803554	0.905468	1.00727	0.995884	0.885305	0.799842	0.897392
Acetyl-L-carnitine	Lipids and lipid-like molecules	204.122	203.116	[M+H]+	0.543145	0.353096	0.601837	0.39822	0.698293	0.663847	0.809502	0.602391	0.391919	0.569697	0.616444	1.00159	0.494171	0.625421	0.34747	0.59193	0.968899	0.6975	0.752108	0.448245	0.5766	0.476861	0.852058	0.759556	1.08614	0.594526	0.827072	0.593355	0.727843	0.892349	0.332812	0.871278	0.880903	0.705347	1.2011	5.81592	0.911496	0.756132	0.711106	0.293273	0.59027	0.438984	2.43486	0.783824	2.38989
Jasmonic acid	Lipids and lipid-like molecules	211.133	210.126	[M+H]+	1.82344	1.34727	1.56779	1.475	1.56243	1.59167	1.44685	1.27504	0.956928	1.17424	1.18978	1.35436	1.51247	1.29049	1.41917	1.29438	1.26407	1.16444	1.1864	1.16829	1.17099	1.14125	1.11686	1.24027	1.22295	1.1872	1.23075	1.28014	0.975833	1.08162	1.19731	1.2302	1.18118	1.08907	1.39815	1.40848	1.13988	2.86998	1.85773	2.13889	1.52756	1.52338	1.4867	1.54648	2.03667
Daidzein	others	255.065	254.058	[M+H]+	3.03458	1.63463	2.60828	1.49092	1.26987	1.2588	1.54595	1.85567	1.95104	1.48474	1.55504	2.81278	1.48501	2.0295	3.1226	1.612	0.988831	1.26937	1.54158	2.1525	1.09346	1.24031	1.31487	0.758067	1.19307	3.02283	1.19054	1.76713	1.12215	1.48665	1.25924	1.98988	1.11884	1.21725	1.30711	0.378858	1.61897	10.9221	1.52349	2.05998	2.33643	1.42837	1.97037	2.94463	2.93945
Hexadecanamide	Lipids and lipid-like molecules	256.264	255.256	[M+H]+	0.121838	0.232751	0.24322	0.264254	0.167153	0.176234	0.191419	1.067	0.82704	0.388391	0.222807	0.237219	0.40442	0.339067	0.548861	1.90701	0.695305	0.665145	1.60511	0.375665	0.507923	0.849861	0.49893	4.18557	0.852754	0.772542	1.43396	2.35922	2.37669	2.7066	3.14391	1.4161	0.747153	0.137533	0.147463	0.295503	0.25887	0.177891	0.323357	0.32276	0.338168	0.213521	0.351074	0.91566	0.453811
Erucamide	Lipids and lipid-like molecules	338.342	337.334	[M+H]+	0.143524	0.121833	0.184621	0.192508	0.291773	0.326903	0.0899276	2.9603	0.945018	0.416364	0.442435	0.212707	0.230435	0.229744	0.171354	0.204716	1.50498	0.414036	1.64109	0.953732	1.13315	0.789581	0.703528	0.884478	1.86568	2.11202	1.19004	7.86105	8.35785	2.04758	3.17203	3.01861	1.39545	0.356207	0.665461	0.230214	0.354682	0.208892	0.447302	0.490206	0.39678	0.528303	1.74175	3.78296	5.82978
Arachidonic acid	Lipids and lipid-like molecules	355.256	304.24	[M+H]+	0.293087	0.31854	1.01854	2.17973	0.254149	0.386969	1.17444	0.24944	0.423692	0.514066	0.257513	0.291714	0.214316	0.265462	0.321429	0.375376	0.293705	0.313096	0.452302	0.282406	0.325102	0.401434	0.329914	0.367194	0.328659	0.287022	0.118903	0.205663	0.358296	0.366624	2.51368	0.61643	0.354104	0.183805	1.00837	0.360811	1.1487	0.485949	3.2353	0.108312	0.627249	0.337135	0.104019	0.242068	0.206766
Palmitoylcarnitine	Lipids and lipid-like molecules	400.342	399.335	[M+H]+	0.41438	0.334553	0.200914	0.264431	0.433577	0.307507	0.154455	0.382192	0.198892	0.552189	0.30108	0.396499	0.431889	0.325825	0.409471	0.405237	0.161576	0.356755	0.356756	0.134784	0.147549	0.278327	0.126358	0.229413	0.281543	1.45205	0.146343	0.119458	0.259157	0.229045	1.13354	0.315481	0.682419	1.23662	1.70455	1.13058	2.59028	1.28735	1.37549	0.553515	0.319192	1.82237	0.823364	1.26511	1.66374
L-Norleucine	Amino Acid And Its Derivatives	132.102	131.095	[M+H]+	1.08811	1.57567	1.46868	1.09827	1.23307	1.38685	1.18538	1.24275	1.11033	1.19813	1.27837	1.18758	1.01035	1.19139	1.11514	1.20179	1.17912	1.21826	1.2382	1.00547	0.887326	1.06298	1.13069	1.13542	0.935316	1.10317	1.18866	1.23737	0.963728	1.31949	1.36939	1.21401	0.825833	0.924767	0.659113	0.859731	0.576647	0.424681	0.516079	0.746117	0.933613	0.960431	0.747338	0.602392	0.722539
D-(-)-Glutamine	Amino Acid And Its Derivatives	147.077	146.069	[M+H]+	0.0950017	0.4032	0.0539708	0.242157	0.21103	0.117527	0.186452	0.0652836	0.0902365	0.124707	0.133051	0.289273	0.117707	0.103371	0.0601047	0.190508	0.197302	0.159604	0.108839	0.134702	0.244042	0.150542	0.222315	0.168482	0.12037	0.0935498	0.208992	0.139323	0.0950888	0.1193	0.344043	0.130329	0.359406	1.03302	1.3193	0.293825	3.65029	6.48682	0.391315	0.562046	1.0183	0.286639	2.48114	0.146177	1.19597
DL-Lysine	Amino Acid And Its Derivatives	147.113	146.106	[M+H]+	0.0823294	0.409394	0.031559	0.242288	0.208196	0.0930716	0.161736	0.0400635	0.0654248	0.108349	0.107824	0.301049	0.101782	0.0863363	0.0402234	0.181038	0.195108	0.149226	0.0797858	0.107263	0.222071	0.136966	0.219552	0.153232	0.119064	0.0555988	0.222371	0.113937	0.0719404	0.103253	0.360503	0.110812	0.363609	1.01166	1.31992	0.263015	3.33425	5.55972	0.400256	0.593444	1.01322	0.296902	2.38576	0.147463	1.12408
Methionine	Amino Acid And Its Derivatives	150.058	149.051	[M+H]+	0.56929	0.415487	0.350455	0.665934	0.789444	0.753375	0.880977	0.922511	0.885197	0.990889	0.817999	0.653593	0.603851	0.74997	0.741302	0.521235	0.794371	0.800905	0.622743	0.682266	0.738349	0.745367	0.87312	1.06036	0.720882	0.698309	0.936964	0.746655	0.829185	0.822516	0.935312	1.24532	0.921809	1.2143	1.25881	0.95965	1.41072	1.24484	1.23889	0.945834	1.17141	0.935032	1.40458	1.26986	1.26052
DL-Carnitine	Camitine	162.112	161.105	[M+H]+	1.44136	1.21139	1.46083	1.40231	1.95031	2.62337	1.19883	0.879094	0.704608	0.701164	0.778875	1.07275	0.717913	0.846552	0.61018	0.827924	0.674232	0.705731	0.671809	0.774619	0.688545	0.675079	0.913863	0.794117	0.731883	0.8067	0.871378	0.817243	1.02125	1.12428	0.887732	0.99519	0.890321	1.07193	1.1493	1.93339	0.950757	0.461106	0.784781	0.299842	0.81513	0.402215	3.64675	1.03521	1.0645
DL-Arginine	Amino Acid And Its Derivatives	175.119	174.112	[M+H]+	1.29054	1.39609	1.86038	1.53472	1.48974	1.27069	1.12749	1.22702	0.969152	1.26184	1.45209	1.08791	2.10158	0.998982	0.986133	1.38776	0.869888	1.48968	0.761264	1.1935	0.856485	0.74689	0.956091	0.868073	1.11433	1.26663	0.652946	1.47873	0.492804	1.18007	1.21072	1.10286	1.07306	0.724408	1.5825	0.844614	1.21367	0.924179	0.980424	1.13851	0.978977	0.375425	1.66628	0.654905	1.22637
D-Aspartic Acid	Amino Acid	132	133.038	[M-H]-	0.568952	0.583424	0.638395	0.671639	0.90269	0.620333	0.477962	0.393079	0.62863	0.949454	0.648146	0.716347	0.748773	0.8248	0.488986	0.688149	1.0179	0.806402	0.418221	0.382023	0.861937	0.796961	0.82475	0.656392	0.676943	0.787598	0.210411	0.794183	0.596411	0.412696	1.03097	0.652516	0.575864	2.45689	1.0343	2.11528	0.880722	1.286	1.78176	1.3533	0.974096	2.23486	1.22965	0.841682	1.25363
L-Cystine	Amino Acid	239	240.024	[M-H]-	0.856933	1.27885	0.422676	0.612141	0.887384	0.568105	1.14067	0.599519	0.538661	0.385428	0.502159	0.864778	0.657427	0.505066	0.349334	0.642668	0.646859	0.517967	0.455145	0.429958	0.699627	0.661434	0.627422	0.69028	0.433421	0.791166	0.736875	0.434925	0.507605	0.58487	0.501155	0.411629	0.448066	1.19202	2.33121	2.22194	1.12714	1.45626	1.71907	0.635578	2.13758	1.00574	3.87378	1.26803	1.31726
L-Threonine	Amino Acid	118	119.058	[M-H]-	0.959391	1.8036	1.13307	1.11347	1.48216	1.85433	1.1134	0.995032	0.958277	1.17877	1.12001	0.942483	1.0658	1.30402	0.973541	0.808744	0.716689	0.996726	1.07402	1.70712	1.05726	1.10196	0.934604	1.51474	0.852078	2.15805	0.749968	1.29179	1.01111	0.817567	0.764787	0.828107	1.0645	0.683561	0.96542	0.834753	0.47186	0.573766	0.703848	0.772851	0.854552	0.713763	0.785227	0.855294	0.642324
L-Arginine	Amino Acid	173.1	174.112	[M-H]-	1.28483	1.25745	1.79568	1.03071	1.12117	0.888085	0.913617	1.27234	0.912918	1.45771	1.5464	1.28743	1.48808	0.952756	1.05736	1.07604	0.961502	1.91121	1.28775	2.22019	1.13675	0.983116	0.802282	1.00555	1.24861	1.29027	0.959785	1.25489	1.25538	1.25478	1.73122	1.14473	1.21441	0.721238	1.66979	1.35975	1.07919	1.02077	1.32059	0.934219	1.36317	0.520045	1.01193	1.01319	0.944578
L-Aspartic Acid	Amino Acid	132	133.038	[M-H]-	0.780463	0.702481	0.907009	0.694678	0.740412	0.62332	0.785057	0.571612	0.74956	0.923622	0.757544	0.656074	0.800217	0.78411	0.713758	0.454865	0.6957	0.737271	0.476502	0.438996	0.725121	0.634306	0.623339	0.552205	0.820341	0.933615	0.330537	0.814057	0.643122	0.714043	1.15251	0.622292	0.677249	1.67189	0.85008	1.55075	0.856903	1.091	1.51461	1.18599	0.767699	1.95255	1.18844	0.623858	1.25904
L-Citrulline	Amino Acid	174.1	175.096	[M-H]-	0.928471	1.32028	0.919619	1.06363	1.29684	1.01478	1.27816	0.988123	0.739522	0.844813	0.80236	0.937706	1.06751	0.959005	0.75347	0.51764	0.737998	1.04224	0.670297	0.841314	0.728101	0.833795	0.783257	0.9476	0.604803	0.835788	0.553936	0.714931	0.874317	1.06592	0.801404	0.829712	0.926151	1.14169	1.91477	0.437526	0.843649	1.27482	1.08052	2.45988	2.1497	0.732515	1.06696	1.63247	1.36754
L-Glutamic Acid	Amino Acid	146.1	147.053	[M-H]-	0.585089	0.5997	0.96273	0.948167	0.612671	0.602622	1.11897	0.378543	0.654792	1.04166	1.01674	0.599459	0.829786	0.837116	0.54042	0.98591	0.48439	0.607237	0.654983	0.329411	0.508955	0.642817	0.76918	0.404495	0.603263	0.60057	0.323052	0.955607	0.553707	0.755385	1.15412	0.805515	0.503092	1.28063	0.66464	2.01858	1.03865	0.937333	1.98797	1.05185	1.24407	2.99231	1.20305	1.00607	1.73723
L-Histidine	Amino Acid	154.1	155.07	[M-H]-	1.00376	1.36618	1.19848	1.06183	1.16239	1.26458	0.929825	1.15396	1.18285	1.11926	1.22404	1.43849	1.05545	1.16842	1.18519	1.16866	0.787151	1.17213	1.03718	1.12375	0.999884	0.935985	1.0427	1.21876	1.00185	1.22679	1.04263	1.13154	1.25968	0.960264	1.43867	1.19414	1.26516	0.858523	0.862943	0.903444	0.623098	0.694794	0.91174	0.81828	1.29708	1.17437	0.996608	0.664811	1.31178
L-Phenylalanine	Amino Acid	164.1	165.079	[M-H]-	0.796964	1.03268	0.972722	0.790438	0.93689	0.856253	0.859882	0.760953	0.832146	1.0082	0.925181	0.817931	0.84357	0.791838	0.843225	0.922585	0.821539	0.811205	0.784115	0.761045	0.820156	0.685088	0.812519	0.775817	0.930617	0.740413	0.738661	1.10183	0.839047	0.988333	1.21186	0.943367	0.884373	1.3081	1.1761	1.25282	1.50316	0.771788	1.14828	1.2253	0.869833	1.23469	1.1555	0.785927	1.05361
L-Pyroglutamic Acid	Amino Acid	128	129.043	[M-H]-	0.537642	1.41232	1.33456	1.10625	1.16227	1.21456	0.829874	1.01204	1.01893	0.940073	1.57287	0.572514	1.07578	0.628804	0.969672	0.895386	1.10943	1.27738	1.18694	0.832615	0.677405	0.695512	0.751353	0.605287	0.742845	1.02017	0.857861	0.969891	1.39466	1.68835	1.46821	1.08778	1.13587	0.675805	0.678868	1.32452	1.01622	0.942979	0.611883	0.907382	0.75001	0.625252	0.958873	0.920037	1.0511
L-Serine	Amino Acid	104	105.043	[M-H]-	0.901053	1.10806	1.30465	1.11803	0.932537	1.02019	1.14634	0.807852	0.800925	1.05303	1.0126	1.13782	0.927734	1.15014	0.859781	1.08116	1.09038	1.34722	1.06864	1.36102	0.992816	1.07543	0.990059	1.2324	1.2715	1.66399	0.864537	1.24914	1.52992	1.33534	1.35882	1.06651	1.17841	0.687914	0.769499	1.04958	0.604071	0.660497	0.851902	1.00333	0.730898	1.04178	0.930931	0.868982	1.01387
L-Glutamine	Amino Acid And Its Derivatives	147.069	146.069	[M+H]+	1.1968	1.35439	1.34811	1.08328	1.56577	1.27499	1.36144	1.19068	1.15856	1.27811	1.1126	1.4608	1.14256	1.29983	1.04312	1.04366	0.663813	1.0404	1.01108	1.28057	1.09093	0.770293	1.01768	1.0869	0.813164	0.9141	0.77594	1.0049	0.91191	1.30791	1.06838	0.956369	0.777954	0.870056	0.800637	0.773083	0.576258	0.671732	0.673826	0.962231	1.11092	0.85856	0.965138	0.795705	0.845703
3-Hydroxy-3-Methylpentane-1,5-Dioic Acid	Amino Acid And Its Derivatives	161	162.053	[M-H]-	0.276907	0.704929	0.325035	0.3116	0.342067	0.238773	0.358643	0.400209	0.412889	0.352937	0.299888	0.235041	0.2697	0.365048	0.362102	0.553043	0.316407	0.293174	1.03665	0.327623	0.347535	0.365433	0.343056	0.308181	0.420656	0.22024	0.288137	0.360464	0.337374	0.307099	0.307949	0.200775	0.415152	0.775126	1.32321	1.5347	2.24524	3.69936	0.62911	0.720432	0.263662	0.398574	1.71259	0.322252	2.53236
4-Hydroxy-L-Glutamic Acid	Amino Acid And Its Derivatives	162	161.032	[M-H]-	1.3772	1.2709	1.01567	0.989278	0.801955	0.840135	1.16561	1.17897	0.713475	1.58657	1.32184	1.34286	0.953152	1.02727	0.914033	1.01564	1.39119	1.06817	0.596918	0.717336	0.837109	0.706358	0.575865	0.944071	1.07295	0.777795	0.960195	1.86317	1.29332	0.872073	0.852859	0.866709	0.651589	1.05974	0.990705	0.897871	0.982228	0.985167	0.895774	1.33578	1.10184	0.814262	0.690688	1.57796	1.0231
Allantoin	Amino Acid And Its Derivatives	157	158.044	[M-H]-	0.99033	0.937978	1.08045	1.16425	1.09114	0.981509	1.04416	0.870557	0.759957	0.93636	0.957847	0.95869	1.02908	1.00952	0.825202	0.876409	0.983907	0.941397	1.03192	0.964887	1.00492	0.973244	0.98275	1.00807	0.971178	1.00764	1.01842	1.06815	0.892272	0.984807	0.898999	0.949348	1.16095	1.05234	1.12728	1.10644	1.06205	0.921774	1.29127	0.8967	0.960719	0.945763	0.98325	0.888853	1.76098
Asp-Phe	Amino Acid And Its Derivatives	279.3	280.106	[M-H]-	0.916588	2.13009	3.07455	1.27266	1.43279	1.24279	1.18967	2.31911	0.941212	1.95712	1.55196	2.03991	1.03689	1.33457	0.906716	1.58045	1.37574	2.63158	0.969614	1.78864	2.5107	1.1292	1.59418	1.81078	2.0954	2.11093	2.10885	0.575588	0.988847	0.865096	1.64399	0.993366	0.767787	0.400628	1.24231	0.222128	0.881914	0.655615	0.671891	0.801429	0.56531	0.369707	1.03729	0.432998	0.801125
D-Glutamic Acid	Amino Acid And Its Derivatives	146	147.053	[M-H]-	0.582232	0.706381	1.01121	0.890439	0.743645	0.769376	1.11945	0.477311	0.673294	1.12632	0.973921	0.700631	0.959729	0.824048	0.673926	0.945351	0.474575	0.695738	0.549075	0.454845	0.775387	0.845847	0.827509	0.698896	0.683976	0.680519	0.445428	0.94932	0.746008	0.670389	1.09475	0.922124	0.706719	1.17181	0.742819	1.53127	0.877593	0.928325	1.74149	0.95173	1.18888	2.29092	1.14533	1.03739	1.55883
Dopamine	Amino Acid And Its Derivatives	152	153.079	[M-H]-	1.19609	1.04592	1.18343	1.01708	1.1854	0.914588	0.958952	0.877173	1.12916	1.09845	0.909083	0.78251	1.14981	1.00229	0.790002	0.780834	0.854008	0.97388	0.807138	1.33889	0.714863	1.01691	1.14658	0.982519	1.22333	0.943197	1.12386	0.851272	1.3334	0.982158	1.15971	1.18068	1.24638	0.652803	0.434012	0.589473	0.711426	1.30237	0.996522	0.591248	0.650001	0.99441	0.640005	0.881847	1.35115
Hexanoyl Glycine	Amino Acid And Its Derivatives	172.1	173.105	[M-H]-	0.119309	0.0760197	0.258397	0.124365	0.262491	0.22814	0.288889	0.421754	0.0927789	0.10968	0.244744	0.321682	0.277093	0.497727	0.673587	0.248229	0.111665	0.157021	0.256224	0.110078	0.0801168	0.123603	0.225905	0.137888	0.324387	0.0946558	0.717158	0.240362	0.914432	0.372855	0.323144	0.381938	0.10735	1.29237	0.214306	0.335777	1.58538	0.369654	0.855405	0.326359	0.196625	1.53809	1.19943	0.627734	3.15702
L-Asparagine Anhydrous	Amino Acid And Its Derivatives	131.05	132.054	[M-H]-	1.01407	1.4965	1.18564	0.998594	1.16149	1.4366	1.05428	1.10373	0.704649	1.01517	0.913416	0.789934	0.596928	0.981293	0.700687	0.900824	0.799497	0.986229	0.83499	1.04517	0.83643	0.869906	1.13106	1.02041	0.68322	1.25748	0.76516	1.26077	1.03685	1.13191	1.22881	1.13915	1.30688	0.725103	0.939471	1.223	0.761025	0.637273	1.14537	0.946962	1.13969	1.31464	0.70328	0.722256	1.67408
L-Cysteine	Amino Acid And Its Derivatives	120.02	121.02	[M-H]-	0.821179	1.11988	0.432583	0.578309	0.467789	0.398352	0.644606	0.800035	0.511451	0.715809	0.592831	0.548511	1.73975	0.72888	0.798949	0.682796	0.87639	1.29786	0.793073	0.322288	0.531482	0.618734	0.751238	0.470581	0.385545	0.422502	0.429978	0.403227	0.534954	2.59116	0.403236	0.3299	0.488377	0.581094	1.05713	0.85797	0.467026	1.08762	0.901913	0.459442	0.657013	0.537016	0.297103	1.30314	0.826898
L-Homocitrulline	Amino Acid And Its Derivatives	188.1	189.111	[M-H]-	0.387893	0.554685	0.230797	0.512305	0.359785	0.140958	0.414746	0.447693	1.54487	0.489834	0.378429	0.412141	0.367339	0.447863	0.532219	0.426352	0.586548	0.592407	2.11966	0.548751	0.486759	0.680907	0.331278	0.722936	0.521556	0.354767	0.983761	0.960888	0.554362	0.721964	0.665439	0.686647	0.811008	1.43486	1.40069	0.486327	0.860401	2.58033	2.40853	2.122	1.80515	1.00996	3.33683	0.840647	3.44474
N-Acetyl-L-Leucine	Amino Acid And Its Derivatives	172.11	173.105	[M-H]-	0.465704	0.668848	0.51152	0.39069	0.447751	0.311201	0.475092	0.333413	0.381548	0.320804	0.346783	0.450073	0.428182	0.419193	0.335924	0.212906	0.274204	0.303432	0.241528	0.499999	0.286443	0.248861	0.402351	0.299426	0.264196	0.315927	0.41729	0.256922	0.35968	0.377303	0.411862	0.311903	0.336936	1.03263	1.27855	2.22917	2.64353	1.28737	2.54474	1.23319	1.09299	1.6279	1.68579	0.890108	4.30738
N-Isovaleroylglycine	Amino Acid And Its Derivatives	158.1	159.09	[M-H]-	0.0646524	0.15144	0.0450966	0.107977	0.0718623	0.0999747	0.256996	0.0484525	0.0502753	0.101058	0.0294228	0.165178	0.0627804	0.0795822	0.135163	0.0515451	0.101551	0.113916	0.0418239	0.0714646	0.0324691	0.0920924	0.0584838	0.0790035	0.036172	0.102938	0.0911808	0.0909749	0.134669	0.0583185	0.122101	0.0603681	0.042182	3.05741	0.974964	0.180758	1.40538	0.841393	0.818877	0.222906	0.362131	1.68735	1.61239	1.37834	1.96435
N-Propionylglycine	Amino Acid And Its Derivatives	130.1	131.058	[M-H]-	0.878822	0.698162	0.49342	0.538931	0.631215	0.713375	0.7729	0.997398	0.863224	0.281325	0.672306	0.65281	0.252368	0.505333	0.677685	0.657871	0.616755	0.434981	0.292156	1.59514	0.570233	0.465046	0.770182	1.06289	0.552668	0.267856	0.523926	1.20944	1.71635	0.783296	0.755496	0.87213	0.389561	0.94112	0.899086	0.850309	1.66441	0.553309	1.90735	0.701102	1.05736	2.55316	1.67122	2.93944	1.72846
Phenylacetyl-L-Glutamine	Amino Acid And Its Derivatives	263.1	264.111	[M-H]-	0.0721917	0.43086	0.0216244	0.25	0.209571	0.0714042	0.214156	0.0375656	0.0563401	0.103935	0.109937	0.360214	0.0701516	0.0822245	0.0287528	0.194323	0.163219	0.125796	0.0698215	0.109454	0.253429	0.141258	0.242575	0.158749	0.106665	0.0419769	0.254993	0.126524	0.0592872	0.0869929	0.461735	0.111606	0.417227	1.12113	0.903458	0.139294	0.468884	0.750176	0.416756	0.545742	0.974964	0.303567	1.59419	0.142783	0.95362
S-(5-Adenosy)-L-Homocysteine	Amino Acid And Its Derivatives	383	384.122	[M-H]-	0.345533	0.482621	0.583018	0.427881	0.377613	0.522903	0.285212	0.437112	0.281532	0.574505	0.281075	0.398794	0.442639	0.629901	0.508487	0.44598	0.26471	0.476744	0.345602	0.23887	0.289004	0.511725	0.712651	0.284806	0.400923	0.466639	0.511301	0.47275	0.483558	0.417651	0.843854	0.776698	0.481046	1.43392	1.56558	0.68521	3.17333	2.66176	1.56596	0.551351	1.09013	0.767841	2.18813	0.832407	1.69169
L-Theanine	Amino Acid And Its Derivatives	175	174.1	[M+H]+	0.818019	1.01104	1.57729	0.949602	1.24951	0.940017	0.784733	1.48872	0.950215	1.37693	0.98743	0.919102	1.70145	0.928627	1.15469	0.853626	0.700207	1.48948	0.965478	1.75893	1.42018	0.870934	0.907395	0.856981	1.18233	1.42859	1.00667	1.86864	1.55423	1.95072	1.65231	1.48829	1.25312	0.664987	1.32943	1.01641	0.980484	0.980611	0.791989	1.00761	0.919269	0.429202	1.19013	0.869598	0.862309
N-Acetylphenylalanine	Amino Acid And Its Derivatives	206.1	207.1	[M-H]-	0.246169	0.257237	0.461761	0.5974	0.65948	0.326713	0.346996	0.370231	0.273944	0.34174	0.210683	0.516209	0.454098	0.381642	0.295328	0.359339	0.193942	0.231359	0.314847	0.10365	0.204453	0.236475	0.330675	0.242316	0.223984	0.262848	0.441907	0.294124	0.526391	0.665145	0.726866	0.374418	0.254049	1.91663	2.78036	1.27235	7.54618	1.39358	1.53561	0.87131	0.656517	1.34925	2.20765	1.27363	3.38823
6-Hydroxy-4-Methylcoumarin	Phenylpropanoids	175	176.047	[M-H]-	0.627139	0.812534	0.660452	0.467104	0.493908	0.436372	0.597195	0.531121	0.557135	0.414746	0.478673	0.48184	0.381514	0.379961	0.588933	0.571266	0.565352	0.686917	0.609791	0.635599	0.560682	0.492606	0.600999	0.902296	0.49543	0.421153	0.64835	0.468901	0.186742	0.624636	3.94927	0.507694	0.488694	0.595746	4.20942	0.531834	3.88235	2.92527	1.33316	0.845112	0.468369	0.784693	1.27108	0.632204	0.586974
P-Coumaric Acid	Phenylpropanoids	163.05	164.047	[M-H]-	0.944522	3.91881	0.418684	0.854735	0.542147	0.493651	0.623949	0.648241	0.662896	0.937763	0.493848	0.396566	0.454165	0.264304	0.801204	0.588868	0.374985	0.461588	0.317178	0.597156	0.349149	0.491956	0.608321	0.488237	0.260882	0.428636	0.991395	0.576899	0.313173	0.572072	0.732204	0.614826	0.692287	4.55979	6.42653	0.755036	1.74248	0.581029	1.19349	0.715542	1.91504	0.729159	0.686204	1.06403	0.596094
Benzoic Acid	Benzoic Acid And Derivatives	121.04	122.037	[M-H]-	1.33386	1.10159	1.43167	1.44734	1.02377	1.33052	1.24057	0.813821	1.15753	1.09992	1.64213	0.514008	1.13993	1.14638	1.26733	0.937867	0.552642	0.893881	0.693084	0.592873	1.67147	0.924525	1.08816	0.552991	0.673355	0.78436	0.590665	1.15186	0.882776	1.19969	1.91475	0.797072	0.987273	0.53916	0.599439	0.888073	0.553409	0.679251	0.642203	1.20441	0.762927	0.485442	0.389075	0.562014	0.458176
Benzoylformic Acid	Benzoic Acid And Derivatives	149.03	150.032	[M-H]-	0.175912	0.138257	0.113834	0.349182	0.169974	0.0912874	0.189524	0.160701	0.102337	0.21904	0.0712644	0.219167	0.151361	0.102781	0.458343	0.0971496	0.200111	0.247038	0.529077	0.0909319	0.185865	0.312229	0.239428	0.099048	0.159913	0.206717	0.166781	0.179438	0.141557	0.150437	0.288626	0.182036	0.247906	1.46834	1.03584	1.46347	1.53712	1.80739	3.60049	2.21897	0.977759	0.549463	4.48038	0.728087	1.02307
Terephthalic Acid	Benzoic Acid And Derivatives	165.03	166.027	[M-H]-	0.202895	0.253297	0.243469	0.162134	0.264913	0.238947	0.129211	0.101569	0.388784	0.15957	0.282018	0.15623	0.228142	0.222456	0.170572	0.285737	0.151813	0.183953	0.123189	0.18274	0.0983038	0.131741	0.198893	0.0863758	0.129686	0.202103	0.149504	0.182286	0.0993934	0.142428	0.223991	0.118966	0.160507	0.169846	0.621224	0.162839	18.4211	0.334326	0.419948	0.350926	0.101064	0.128549	0.32582	2.16422	0.779849
(3,4-Dimethoxyphenyl) Acetic Acid	Benzoic Acid And Its Derivatives	195.07	196.074	[M-H]-	0.473383	0.451766	1.6367	0.48094	0.421305	0.323796	0.753541	0.631539	2.08114	0.594112	0.401499	0.761168	0.635602	1.34702	0.441759	0.794555	0.523425	0.264744	1.23688	0.821827	1.46556	0.388342	1.22459	0.721755	1.61007	0.838631	0.484269	0.914421	8.36055	0.95148	1.12541	0.892402	1.03689	1.38741	1.79726	2.12762	0.777398	1.6092	0.67067	1.58729	2.33219	1.78881	1.19506	2.80483	1.76441
3-(4-Hydroxyphenyl)-Propionic Acid	Benzoic Acid And Its Derivatives	165.06	166.063	[M-H]-	0.405125	2.38621	0.327845	0.507341	0.724677	0.431438	0.312878	0.541059	0.357887	0.53473	0.528367	0.371225	0.218218	0.335558	0.270314	0.408434	0.425758	0.180937	0.279357	0.167381	0.20075	0.266725	0.726078	0.387584	0.259371	0.495885	0.229566	0.155956	0.471233	0.533368	0.381601	0.327692	0.247124	0.874448	1.25541	1.9068	3.48266	0.369355	1.46553	3.78759	2.31072	0.976906	1.24594	1.9699	0.968412
N,N-Dimethylglycine	Amino Acid And Its Derivatives	104	103.063	[M+H]+	1.23034	1.60917	1.53981	1.21131	0.931557	0.844637	0.818154	0.759869	0.811113	0.784429	1.01094	0.900727	1.06562	1.00961	1.2056	1.20496	0.970008	1.14805	1.13246	0.857549	0.651326	0.738181	0.767595	0.73318	0.704616	1.16944	1.03008	1.45907	0.923601	1.20291	1.14775	1.00276	1.05796	0.86269	0.681943	0.899868	0.868192	0.564099	0.687931	0.669351	0.683074	0.68442	0.732932	0.669548	0.934963
Phthalic Acid	Benzoic Acid And Its Derivatives	165.03	166.027	[M-H]-	0.296586	0.201616	0.313668	0.33792	0.28325	0.303899	2.84285	2.97476	1.02976	0.251916	0.314641	0.332212	0.317323	0.328907	0.399597	0.331201	0.210052	0.316575	1.00717	0.20844	0.31175	0.404228	0.296308	0.311784	0.295834	0.308202	0.291588	0.431606	0.252578	0.3403	0.48233	0.280818	0.261	0.858983	4.3207	0.630489	0.612723	1.7803	2.91054	1.4991	0.29576	0.582578	2.33718	12.7242	2.27517
P–Hydroxyphenyl Acetic Acid	Benzoic Acid And Its Derivatives	151	152.047	[M-H]-	0.12116	0.218818	0.131257	0.218509	0.159582	0.15014	0.108793	0.09404	0.0601781	0.108124	0.118902	0.0951656	0.111518	0.236958	0.0937707	0.47607	0.139026	0.0877006	0.0888464	0.187772	0.0788345	0.0511895	0.120695	0.16987	0.0678157	0.0985278	0.120956	0.101225	0.100716	0.123679	0.598467	0.121163	0.421867	2.93344	0.859482	0.298461	8.39287	1.26873	0.380404	0.975147	0.279943	0.766857	0.742075	0.337251	1.97869
Tauroursodeoxycholic Acid	Bile Acids	498.3	499.297	[M-H]-	0.415393	4.11763	0.546304	1.53794	0.182537	0.893005	0.939165	0.130934	0.695009	0.276922	0.516928	0.965996	1.07291	0.520747	1.09859	1.8172	0.94458	1.04506	3.10997	0.44133	1.04264	0.984081	1.0041	0.244822	0.836215	2.07209	0.465028	0.295095	0.376817	0.625391	0.60034	0.993934	0.657991	13.7869	3.5469	3.16963	1.652	5.11315	0.763462	1.33504	0.378939	1.02891	0.541591	0.357183	0.598752
Taurocholic Acid	Bile Acids	514.29	515.292	[M-H]-	0.246592	0.533401	0.298629	0.795411	0.122231	0.268298	0.873961	0.146085	0.366895	0.259757	0.223735	0.942383	0.553973	0.47528	0.313486	0.558311	0.281888	0.259244	1.34817	0.411143	0.335372	0.237265	0.0714342	0.428766	0.187039	1.8731	0.421485	0.855438	0.176152	0.498746	0.151498	0.170789	0.26149	12.1431	2.90523	0.811304	5.25446	2.45261	0.734589	0.502722	0.364939	0.46526	1.2979	0.320998	2.53552
Taurochenodesoxycholic Acid	Bile Acids	498.3	499.297	[M-H]-	0.0526796	0.549995	0.249671	0.428836	0.0880385	0.0894603	0.968713	0.125031	0.20189	0.105355	0.107585	0.12324	0.226468	0.0320431	0.146273	0.118044	0.272099	0.0963137	1.35371	0.112719	0.105962	0.161753	0.167111	0.317271	0.143158	1.6276	0.275579	0.380784	0.26073	0.207223	0.111179	0.0637383	0.158311	12.2956	2.45282	1.43046	4.5287	2.15251	0.0922383	0.552041	0.344387	0.309665	1.1015	0.234266	1.51196
Hyodeoxycholic Acid	Bile Acids	391.29	392.293	[M-H]-	0.457382	8.02656	0.229499	2.0984	0.459428	1.11078	0.211663	1.88539	2.95644	0.235757	6.21601	0.147977	0.231826	0.733542	1.26103	4.50573	0.807397	1.20504	1.50605	2.67907	0.172921	0.673533	0.434382	0.542994	0.163182	1.21587	0.0701177	0.1414	0.830956	2.07985	1.02534	0.238085	0.207738	0.0408894	0.24482	0.0688027	0.0437824	0.26991	0.472804	0.261027	0.171029	0.0811788	0.355712	0.183478	0.066967
Glycoursodeoxycholic Acid	Bile Acids	448.31	449.314	[M-H]-	0.13928	7.54559	0.63911	0.896129	0.150645	0.462822	0.770515	0.500822	1.28372	0.0918281	1.23716	0.202905	0.237773	0.125403	1.9934	1.00991	0.898859	0.139119	4.7565	0.646542	0.126096	0.216266	0.130835	0.56307	0.10699	1.04285	0.153848	0.0495803	0.728551	0.548027	0.226334	0.207204	0.218396	3.60549	1.49512	0.486067	0.447327	2.36439	0.584347	0.745416	0.552413	1.72056	0.166114	0.713059	0.218285
Glycocholic Acid	Bile Acids	464.31	465.309	[M-H]-	0.71419	3.25011	1.12926	0.940509	0.864314	1.41103	2.88748	0.691163	0.498994	0.603962	0.810699	1.85656	0.434887	0.399372	1.40564	0.56889	0.773014	1.18264	4.01258	0.472465	0.521381	0.6089	0.527799	0.604333	1.04993	2.06664	1.28729	0.657263	6.37685	0.506872	0.522858	0.755097	0.697562	2.50718	0.993791	0.92745	2.83253	1.96669	0.214248	0.920913	0.825112	3.73489	0.487418	0.89741	0.589383
Glycochenodeoxycholic Acid	Bile Acids	448.31	449.314	[M-H]-	0.0946666	2.37948	1.22418	0.483996	0.19783	0.374132	1.6647	0.348965	0.941952	0.210487	0.436955	0.259392	0.408958	0.0629254	0.693571	0.388217	0.558741	0.186273	2.88236	0.235137	0.170144	0.222004	0.186793	0.634077	0.214779	1.39948	0.206736	0.111133	0.838581	0.431139	0.327517	0.278046	0.340998	4.63573	2.23625	1.36484	2.41027	2.81745	0.106185	0.593376	0.688404	1.2952	0.581209	0.646039	0.756454
Deoxycholic Acid	Bile Acids	391.29	392.293	[M-H]-	1.75163	3.31857	0.0196915	0.915198	1.05089	1.11266	3.0009	0.924008	1.03366	0.306457	0.111367	2.6672	1.58229	0.526547	0.868836	1.39417	1.82169	0.835837	1.03145	3.59924	0.76126	1.99694	1.07	4.00612	1.38918	0.474526	0.0503321	2.11102	0.76498	1.7733	1.27183	1.28056	1.52413	0.263009	0.0600766	0.0258289	0.0168315	0.269884	2.34598	0.00779118	1.31437	0.118158	1.75169	0.0621238	0.123446
N-Acetylaspartate	Amino Acid And Its Derivatives	176	175.048	[M+H]+	0.508098	0.241903	0.250362	0.41051	1.27578	0.927522	0.503786	0.995186	1.02579	1.43059	1.04931	1.40713	0.553068	1.16789	1.17362	0.968678	1.30333	0.985235	1.10813	1.50505	1.24062	1.06215	0.88225	1.11754	1.66306	0.760257	0.998568	1.15403	1.66588	2.00007	1.17342	1.1967	1.47505	1.33376	0.623567	0.41565	0.984557	0.707423	1.62094	0.625829	0.520735	0.433384	0.429671	0.486441	0.627994
Chenodeoxycholic Acid	Bile Acids	391.29	392.293	[M-H]-	1.76149	3.45562	0.0241531	0.862205	1.00922	1.07962	2.80163	0.931757	0.925643	0.339418	0.111268	2.61319	1.52166	0.50806	0.0162054	1.35566	1.85905	0.846002	0.986508	3.42757	0.751958	2.00466	1.04512	3.83722	1.35028	0.460818	0.0706953	2.07134	0.804737	1.7627	1.43461	1.26944	1.49909	0.264177	0.0749122	0.0222039	0.0156101	0.25712	2.31604	0.00762941	1.3883	0.110581	1.77833	0.0546158	0.132129
Phenethylamine	Polyamine	120.9	121.089	[M-H]-	1.29812	1.07882	1.48519	1.43457	1.02906	1.36041	1.21464	0.849934	1.17464	1.11146	1.69007	0.529669	1.13422	1.16849	1.22837	0.946713	0.551405	0.900142	0.691892	0.603015	1.66701	0.913305	1.08189	0.556764	0.667153	0.798492	0.603964	1.15351	0.891664	1.23543	1.95644	0.822146	1.03933	0.565184	0.609029	0.945168	0.585028	0.692222	0.663555	1.21238	0.779476	0.531044	0.407795	0.579753	0.50148
4-Methylcatechol	Phenols And Their Derivatives	123.05	124.052	[M-H]-	0.0147335	0.193682	0.0233872	0.0514546	0.0304515	0.0179547	0.430424	0.0484007	0.0271614	0.0143752	0.0276984	0.0242475	0.0284763	0.0220418	0.0326934	0.0123123	0.016194	0.0488058	0.0336493	0.0214582	0.0469058	0.0383687	0.0339298	0.0113157	0.0192019	0.00996331	0.0225427	0.0146745	0.0113507	0.00968113	0.136097	0.0251024	0.0759142	3.921	0.0392365	0.0220878	0.130655	28.8186	0.0279852	0.0109246	0.125229	0.0141653	0.0533271	0.0222336	3.38412
Dulcitol	Phenols And Their Derivatives	181.08	182.079	[M-H]-	0.82968	0.705016	0.641216	0.206077	1.39478	3.04445	1.45217	2.35242	1.70772	1.76773	1.38316	0.0528962	0.722211	0.295707	0.346318	0.683582	4.46563	1.68916	1.3563	2.77974	0.760106	1.5862	0.283452	1.02471	0.674942	0.838224	0.355996	1.5465	0.251102	0.0739734	1.55516	0.727458	0.0935201	1.10798	1.14376	1.49806	1.10771	1.22248	0.373495	0.198626	0.428041	1.56037	0.224166	0.641983	4.04102
P-Hydroxyphenylacetate	Phenols And Their Derivatives	151.1	152.1	[M-H]-	0.0600498	0.0389607	0.227721	0.0942101	0.079423	0.131941	0.0932679	0.0661831	0.0616867	0.094619	0.0666129	0.064908	0.0770628	0.0599947	0.057501	0.0564303	0.227896	8.3923	0.131179	1.50331	6.45377	6.92335	7.24615	0.0795873	1.89289	4.03116	8.42969	13.5565	0.0690963	6.68581	2.84578	0.0757535	2.93344	0.0531261	0.0382609	0.0397489	0.0414493	0.175715	0.0864571	0.0501073	0.0714743	0.0600186	0.113637	0.0493511	0.582253
(R)-1,2-Dithiolane-3-Pentanoic Acid	Co-Enzyme Factor	205.04	206.044	[M-H]-	1.39788	1.52602	0.987603	1.32923	1.27163	1.466	1.14746	1.75115	0.694506	1.12253	1.12122	1.45373	0.761425	0.906761	1.24995	1.015	0.955711	0.840795	1.62574	0.669206	0.727742	1.00112	0.872991	1.55517	1.08378	1.57443	1.52856	1.21295	0.750501	1.42409	0.948136	0.742608	0.823182	0.863965	1.00999	0.520827	0.432027	0.468552	0.838779	1.03847	0.842301	0.768855	0.938485	0.666198	0.622344
(R)-Lipoic Acid	Co-Enzyme Factor	205.04	206.044	[M-H]-	1.40488	2.12041	1.97642	1.45377	1.14624	1.98502	1.12095	1.61322	0.893739	1.51274	1.04621	1.79965	1.46008	1.22695	1.20537	1.27877	1.4865	1.2476	1.30323	1.28443	1.25659	1.16388	0.994693	1.43464	1.56573	1.33872	1.2311	1.44173	1.81524	1.68205	1.18102	1.05675	0.635691	1.05031	0.662559	0.473412	0.402109	0.567313	0.758773	0.541865	0.239689	0.719649	1.26766	1.07427	0.78316
N-Acetyl-L-Glutamic Acid	Amino Acid And Its Derivatives	190.1	189.064	[M+H]+	0.510904	0.565313	0.211966	0.296679	0.375677	0.270522	0.270969	0.64648	0.781593	1.22281	0.220449	0.643515	1.22987	0.96913	0.750657	0.773847	0.661549	1.06805	1.06085	0.63706	0.692961	0.600776	0.678478	0.572575	1.20773	0.797073	0.677092	1.05897	1.18918	1.05934	1.37864	0.862265	1.01395	1.21238	1.11874	1.10725	1.8299	2.26563	2.32071	1.11553	1.57153	1.15241	2.86413	0.642633	3.29151
1-Methylxanthine	Nucleotide And Its Derivates	165.1	166.049	[M-H]-	0.255888	2.68773	5.24416	0.448052	1.40082	1.29407	8.9857	2.26588	0.184057	3.33732	2.69994	0.162377	5.35315	0.12415	0.136569	1.22968	1.7142	1.95095	0.191501	0.103711	3.39667	2.6065	0.289738	0.478589	2.89524	0.431143	0.871672	4.29585	0.187815	0.160187	0.196474	0.154175	0.0591413	0.27801	0.210577	0.282024	0.444505	0.207733	0.248566	0.20191	0.215432	0.53832	0.149199	0.148702	0.195094
2,6-Dihydroxypurine	Nucleotide And Its Derivates	151.03	152.033	[M-H]-	0.309996	0.546769	0.747588	0.397006	0.506282	0.386383	0.715557	0.476591	0.424102	0.523812	0.536992	0.491583	0.501047	0.444588	0.420342	0.517063	0.413715	0.522145	0.73527	0.407881	0.297652	0.514099	0.602935	0.581108	0.652231	0.621465	0.376226	0.641538	0.458302	0.505198	0.700393	0.541539	0.46192	0.626641	0.433896	1.75603	0.500218	0.377912	0.803805	1.04677	0.867381	0.929713	0.594072	0.386841	0.602756
N-Acetyl-L-Tyrosine	Amino Acid And Its Derivatives	224.1	223.085	[M+H]+	0.0737607	0.100015	0.0832609	0.144669	0.188545	0.142826	0.0952453	0.103715	0.121442	0.128226	0.0904987	0.0978752	0.113725	0.107839	0.0735879	0.0433961	0.0869663	0.126351	0.0573603	0.0831897	0.0644858	0.085287	0.0899863	0.115248	0.0691373	0.0878446	0.110956	0.0424098	0.117212	0.186246	0.0808699	0.0571757	0.0807662	0.603923	1.27375	0.900984	1.81569	37.1794	0.363916	0.375737	0.136698	0.60314	0.804553	0.403153	1.10242
5'-Deoxy-5'-(Methylthio) Adenosine	Nucleotide And Its Derivates	296	297.09	[M-H]-	0.370514	0.390498	0.38023	0.456909	0.616694	0.35346	0.529198	0.692503	0.639789	0.652365	0.434401	0.227145	0.290617	0.596091	0.50314	0.538602	0.373766	0.554181	0.404845	0.547845	0.314941	0.510291	0.724221	0.616308	0.555698	0.337351	0.439146	0.559401	0.413545	0.28598	0.593624	0.473323	0.45032	1.68392	2.63066	2.20909	1.5411	1.81023	1.33875	0.522084	1.36551	1.96778	3.18579	1.50957	1.07291
Hypoxanthine	Nucleotide And Its Derivates	135	136.039	[M-H]-	0.246551	0.367936	0.415052	0.272335	0.304052	0.309093	0.39069	0.256284	0.310654	0.355843	0.309973	0.2718	0.313417	0.329988	0.295927	0.255908	0.219831	0.327284	0.360384	0.205547	0.234003	0.371818	0.328883	0.32779	0.301824	0.391196	0.199164	0.301966	0.244459	0.272639	0.30621	0.305369	0.243295	2.61418	0.883135	2.41536	0.395832	0.855786	0.909575	1.7776	1.86736	0.682732	0.881874	1.06565	1.55949
Inosine	Nucleotide And Its Derivates	267.1	268.081	[M-H]-	0.347667	0.250013	0.175433	0.197761	0.190503	0.0735685	0.117727	0.309941	0.179404	0.1295	0.322877	0.412046	0.186239	0.140511	0.254732	0.0629246	0.085549	0.145456	0.361871	0.221879	0.115106	0.260282	0.0670053	0.250941	0.23153	0.158531	0.370703	0.397876	0.219108	0.173186	0.338048	0.184629	0.0936289	2.03139	1.24663	3.64655	0.129297	0.132537	0.766295	3.89138	7.8696	0.812745	3.31839	1.63255	0.218053
N-Acetylneuraminic Acid	Amino Acid And Its Derivatives	310.1	309.106	[M+H]+	1.42283	0.724674	0.710664	0.759013	1.27374	1.00064	0.892301	0.654001	0.619818	0.599068	0.54841	0.444665	0.65605	0.487736	0.358944	0.678858	0.594596	0.454253	0.59542	0.528993	0.493193	0.840508	0.729512	0.42115	0.626632	0.42738	0.952509	0.625676	0.725272	1.15433	0.951055	0.598295	0.534906	0.988262	0.950386	0.944551	0.925059	0.914535	0.816143	1.05322	1.96431	1.22397	1.04116	0.891765	0.873257
Uridine	Nucleotide And Its Derivates	243.1	244.07	[M-H]-	0.747916	1.49695	1.00572	1.01681	1.2913	1.25312	1.37709	0.834052	0.945898	1.00623	1.22916	1.13012	0.854566	1.11071	0.611185	0.807176	0.97436	1.03196	0.883333	0.973589	1.12065	0.980113	1.0313	0.9764	0.765094	0.992303	0.856197	0.844448	1.0081	1.00244	1.09644	0.864943	0.87782	1.52933	1.95915	0.912377	1.25272	1.28223	1.11315	1.29737	1.1006	0.987441	1.18806	1.03667	1.16019
Β-Nicotinamide Mononucleotide	Nucleotide And Its Derivates	333.1	334.057	[M-H]-	0.519147	0.609176	0.308082	0.380027	0.559147	0.404327	0.376725	0.671111	0.762065	0.663042	0.608367	0.694479	0.776541	0.533164	0.695402	0.56504	0.713062	0.800286	1.19567	0.753767	0.468296	0.71486	1.00396	0.579542	0.71656	0.742813	0.704706	1.04835	0.797439	0.738647	0.830483	0.581991	0.846227	1.09638	1.46185	1.82501	1.21601	1.42314	1.01321	0.461388	0.881816	0.89297	0.944014	0.997976	1.28363
L-Thyroxine	Hormones	775.69	776.687	[M-H]-	1.31831	1.14101	1.13321	1.14768	0.779879	0.809644	0.847175	1.14566	1.26692	1.06982	0.931529	0.82998	1.1031	1.12984	0.75311	0.994414	0.823029	1.00615	1.23423	1.17797	1.01241	1.25239	1.39268	1.17066	0.962157	1.43881	1.30156	1.84979	1.4104	1.07321	1.10317	1.1996	1.39672	0.698147	0.95668	0.971086	0.52044	0.527711	0.886806	0.83602	0.919749	0.846397	1.05323	0.736277	0.687007
Ng,Ng-Dimethylarginine	Amino Acid And Its Derivatives	203	274.096	[M+H]+	0.730641	0.352323	0.738312	0.611548	0.97389	0.931379	0.798592	0.633704	0.609007	0.547113	0.597642	0.5266	0.447844	0.436401	0.5085	0.494781	0.495865	0.591223	0.726684	0.536326	0.6809	0.405176	0.535976	0.659894	0.435051	0.586554	0.58911	0.574663	0.654613	0.75724	0.539357	0.763918	0.849863	0.638075	1.15189	0.301097	0.525336	1.39766	1.04117	1.4328	1.05734	0.212209	1.80027	0.636961	0.696666
Ethyl Gallate	Catechin Gallates	197.05	198.053	[M-H]-	0.113982	0.767626	0.29494	0.12761	0.10147	0.101085	0.173393	0.258471	0.0841458	0.083643	0.163035	0.165775	0.111122	0.0834205	0.101817	0.138344	0.239798	0.139608	0.334765	0.123817	0.133905	0.0895714	0.120935	0.123182	0.143638	0.141828	0.118163	0.253417	0.0826125	0.164365	0.281891	0.173111	0.110686	1.67424	1.63768	0.403741	0.700675	5.28496	0.644026	0.861401	0.200338	0.60004	1.49523	0.479771	2.81389
Citric Acid	Tca Cycle	191	192.027	[M-H]-	0.565739	0.696906	0.784986	0.524994	0.822282	0.633999	0.466803	0.378162	0.584856	0.390981	0.353624	0.533932	0.617302	0.644968	0.700145	0.704165	0.85669	0.974929	1.05392	0.87049	0.907423	0.74452	0.689792	0.877236	0.815207	0.761761	0.709634	29.2172	11.2963	5.29127	3.26752	4.16319	2.72653	0.535325	0.268678	0.280327	0.311106	0.817588	0.349594	0.487836	0.428951	0.412734	0.525475	0.551242	0.61598
L-Malic Acid	Tca Cycle	133	134.022	[M-H]-	0.942918	0.901913	0.877489	0.848299	1.24859	0.937938	1.61378	0.973883	1.08785	0.979615	0.889932	1.14322	0.868143	1.0997	0.893831	0.945237	1.07571	0.722809	0.901266	0.824032	1.2297	0.833478	1.14463	0.761037	0.947432	0.832228	1.20684	3.44263	2.0181	1.2484	1.51661	1.89049	1.25723	0.992544	0.912907	0.986739	0.795326	0.828309	0.848936	0.86313	0.997706	1.10991	1.02835	1.25841	1.18845
Succinic Acid	Tca Cycle	117.03	118.027	[M-H]-	1.07476	0.816659	0.917056	0.868107	0.969505	0.889766	1.02253	0.87664	1.34208	0.947186	1.15456	0.863834	1.21987	1.34678	1.21934	1.10044	1.34049	1.23833	1.14588	1.00024	1.28605	0.903394	0.957105	0.965325	1.64177	1.34068	1.12901	1.2515	1.7544	1.94857	1.14509	1.45192	0.943182	0.398537	0.402052	0.908464	1.52564	0.566365	0.783312	0.642954	1.10279	0.784334	0.869206	0.584123	1.0777
D-Sorbitol	Sugar Alcohols	181	182.079	[M-H]-	1.33162	1.11014	0.768526	0.27463	1.38339	2.82435	1.41752	2.22834	0.0462671	0.0707723	0.0602855	0.104049	0.0545399	0.292406	0.368452	0.075984	4.32778	1.60119	1.39761	2.74599	0.758442	1.55238	0.242711	0.791023	0.056896	0.697345	0.396016	1.38335	0.206189	0.0726615	1.40945	0.0255609	0.108993	0.902778	1.16274	1.43069	0.878327	1.13713	0.361187	0.200113	0.363324	1.20209	0.169368	0.74912	3.32329
L-Arabitol	Sugar Alcohol	151.15	152.069	[M-H]-	1.10245	1.05507	1.97594	0.456377	1.83083	1.51463	0.7155	1.86804	2.1239	1.46072	1.34894	2.28057	1.41285	1.76281	1.50849	1.04263	0.242681	1.39593	0.693926	0.74192	1.202	0.242878	1.3159	0.861816	0.494091	0.824266	0.481458	1.18148	0.388162	1.09269	1.01121	0.611595	0.824032	1.26512	1.07691	0.592646	0.925565	2.36684	2.60741	1.08281	1.34191	0.803858	2.08183	1.65224	2.05567
D-Fructose	Carbohydrates	179	180.063	[M-H]-	0.740054	0.528411	0.696694	0.436013	0.895612	0.89356	1.09715	1.37803	1.22157	1.12889	1.36148	1.30661	1.21865	1.28257	1.14602	1.40983	0.940989	1.04675	1.19751	1.05393	1.34325	0.853059	1.42823	1.05187	1.16419	0.806226	0.701463	1.03178	1.08319	0.949713	0.934026	1.17546	1.20782	0.78465	1.74576	0.677639	0.778629	1.18039	0.7581	1.37689	0.77388	0.23947	5.7774	0.961302	0.382293
D-Galactose	Carbohydrates	179	180.063	[M-H]-	0.819223	0.809855	0.949869	0.694281	0.888875	0.97115	0.822445	1.15647	0.730325	1.09649	1.26072	1.21837	1.01578	1.22569	1.225	1.33303	0.928748	0.925469	0.970166	1.13006	1.27048	0.916941	1.45548	1.14894	1.29845	1.03102	1.0476	1.02318	1.30115	1.12951	1.02398	1.17899	0.962837	0.696513	1.59916	0.644912	0.703978	1.31341	0.621088	0.850384	0.611721	0.198602	3.60806	1.00103	0.204239
D-Mannose	Carbohydrates	179	180.063	[M-H]-	1.21904	1.0666	0.956913	1.07403	0.977613	1.04448	0.959155	1.06743	0.679841	0.934837	1.40936	1.06704	0.904237	1.36255	1.25922	1.07239	0.844875	1.42302	1.24126	1.31368	1.2457	1.16127	1.5094	1.13334	1.66401	1.40326	1.29994	1.27046	1.46616	1.84127	1.55923	1.1651	1.50171	0.580606	1.82387	0.540339	0.875133	1.06831	0.886228	0.921371	0.393727	0.308233	4.34776	1.49365	0.491429
D-Sucrose	Carbohydrates	341	342.116	[M-H]-	1.15034	0.825366	1.20684	1.02727	0.695894	0.601898	0.774822	1.03333	0.574156	0.939575	0.94816	0.966317	0.368681	1.09436	1.57277	1.52541	1.3986	2.09225	1.75638	2.10608	2.92139	2.43477	2.04621	2.29767	2.53015	2.5974	3.15694	1.65625	3.5414	1.64413	1.39604	1.72	2.31657	1.90712	0.695316	0.461132	0.532409	1.19779	0.673342	0.920127	0.588855	1.05127	0.773258	0.653558	0.350289
D-Trehalose	Carbohydrates	341	342.116	[M-H]-	1.33995	1.04897	1.44027	1.01322	1.24001	0.689789	0.877505	3.0175	1.77604	2.38217	1.8691	2.01342	2.45156	2.26723	2.29084	1.88234	1.9956	2.81497	2.53706	3.04914	2.8268	2.65119	1.62346	2.27068	2.04413	2.38888	2.72268	2.27549	3.71411	2.46781	1.75093	1.77766	3.4328	1.27844	1.44629	0.654538	0.419372	1.78578	0.803453	0.779166	1.01625	1.21913	0.510905	1.11278	0.406984
D-Erythronolactone	Carbohydrates	117	118.027	[M-H]-	1.33785	1.07094	1.26994	1.21613	0.888481	0.926316	0.661372	0.600211	0.675031	0.552218	0.636403	0.616933	0.660764	0.71413	0.63232	0.679432	0.616488	0.596453	0.560974	0.468031	0.5364	0.580704	0.544639	0.560518	0.508802	0.541807	0.523942	0.481429	0.503638	0.432683	0.390489	0.498408	0.480746	0.834804	1.02302	0.750117	0.911461	1.14307	1.0621	1.22504	1.09689	0.892823	0.762362	1.1977	0.861987
D-Arabinose	Carbohydrates	149	150.053	[M-H]-	0.199071	0.398169	0.353306	0.36833	0.461176	0.209517	0.275566	0.826587	0.497929	0.398839	0.55139	0.556913	0.515978	0.862492	0.809433	0.823174	0.53021	0.721434	0.615722	0.723232	0.787364	1.00134	0.724789	0.870018	0.647781	0.810892	0.719783	0.555758	0.947227	0.547022	0.598884	0.690733	0.886407	1.60843	1.96741	0.905747	2.289	2.8095	1.48853	1.08892	0.795561	0.668807	3.65695	0.811423	2.4381
Nα-Acetyl-L-Arginine	Amino Acid And Its Derivatives	217.1	216.122	[M+H]+	1.51399	1.7516	1.18119	1.09639	1.01597	1.13053	0.86298	0.554531	0.794194	0.781632	0.829742	0.500165	0.544182	0.517373	0.994348	0.787056	0.743388	0.448338	0.365603	0.348114	0.851484	0.583812	0.675415	0.460199	0.613259	0.520188	0.503835	0.412892	0.854124	0.816082	0.815226	0.353018	0.780916	1.07828	1.01268	0.929592	1.31538	0.717723	0.701169	0.436166	0.997982	1.39863	3.02914	0.496335	1.20325
N-Acetyl-D-Glucosamine	Carbohydrates	220	221.09	[M-H]-	1.43642	1.27348	1.54997	1.46998	1.41353	1.42244	1.69499	1.16906	1.16513	1.31401	1.35078	1.30546	1.3419	1.10146	1.18357	1.2028	1.38853	0.995353	0.915341	1.02116	1.10336	1.22979	1.17183	1.25747	1.00808	1.10013	0.911929	1.00558	1.01512	1.06434	0.887594	1.06993	0.944644	1.63458	1.66137	1.66728	1.44179	1.40642	1.3095	1.15723	1.30171	1.2547	1.11538	1.07535	1.03284
D-Glucoronic Acid	Sugar Acids And Derivatives	193.14	194.043	[M-H]-	0.131467	0.215729	0.353095	0.217242	0.397538	0.262885	0.308031	0.140137	0.184516	0.201281	0.11353	0.147741	0.286545	0.201866	0.162608	0.27001	0.181583	0.232868	0.236384	0.152959	0.19873	0.12283	0.159037	0.079567	0.196812	0.171382	0.291536	0.358003	0.136275	0.227573	0.197388	0.219976	0.164491	1.45211	1.22375	0.79338	3.72293	4.16199	1.07515	0.488786	0.568321	0.527018	1.73867	0.494575	3.91885
Vitamin D3	Vitamine	383	384.339	[M-H]-	0.964058	0.949354	1.14379	1.11408	1.00042	1.47767	1.04256	1.37047	1.80407	0.80153	0.856697	0.923314	0.588535	0.882829	0.849347	0.774047	2.06043	0.760091	1.71843	0.899061	1.1757	1.00844	1.03002	1.08687	0.875496	0.882563	0.868333	1.18975	1.04851	1.023	1.13355	1.13603	2.95395	1.48842	0.391054	0.815302	0.743365	0.526318	0.831552	1.31835	0.496201	1.75673	0.907445	1.14313	1.4976
Pantothenate	Vitamin	218.1	219.1	[M-H]-	0.511597	0.830181	0.836129	0.619192	0.695633	0.51687	0.855977	0.620057	0.453399	0.813543	0.878712	0.839591	0.755939	0.693175	0.819035	0.698161	0.602972	0.937213	0.729573	0.429442	0.517181	0.675803	0.703821	0.532899	0.510592	0.401726	0.673039	0.68954	0.629797	0.596947	0.564	0.629173	0.698098	1.45843	0.954764	1.14528	0.888611	0.826687	1.31391	0.714123	0.722647	0.771245	1.0799	0.749212	1.75243
Nicotinamide-N-Oxide	Vitamine Related	137	138.043	[M-H]-	1.03115	1.15873	1.00128	1.10022	0.985904	1.12211	1.52625	1.06501	0.931939	1.0766	1.00564	0.992784	1.05803	1.0529	1.05305	0.999094	1.11262	0.970843	0.871012	0.988484	0.935853	1.12258	0.888354	0.876778	0.84235	0.946582	1.04051	1.002	0.963443	0.910233	0.91648	0.978293	1.07054	1.05883	0.927853	1.0067	0.877252	0.980612	1.06806	1.10028	1.01131	1.02291	1.18939	1.06774	1.15339
Riboflavin	Vitamine Related	375	376.138	[M-H]-	0.621931	0.714833	0.860332	0.779711	1.21698	0.797163	0.935229	0.530374	0.770046	0.91302	0.50707	2.20325	0.679235	0.849855	1.27549	0.766092	0.278728	1.04922	0.737428	0.384728	0.809718	0.736754	1.04229	1.71513	0.445186	1.22014	1.36277	1.05384	0.517953	3.41663	2.20325	0.85419	0.917264	0.728474	0.359932	1.30209	0.427509	0.310596	0.75695	0.526545	0.519665	0.486401	0.376671	0.785488	7.34776
Cortisone	Drugs	359	360.194	[M-H]-	1.0803	1.23394	1.23554	1.19705	1.49654	1.95853	2.24515	1.09521	1.44592	1.91844	0.837627	1.57009	1.03375	1.46665	1.21618	1.80063	0.961442	0.873503	2.01996	1.12394	1.15961	1.32585	1.07873	1.07324	1.73596	1.97446	1.35239	2.54043	1.49129	1.6429	1.69214	1.92596	1.71792	0.353392	0.468666	0.0404142	0.409731	0.353288	0.353682	0.550512	0.290905	0.328923	0.090358	0.590757	0.518459
3-Indolepropionic Acid	Indole And Its Derivatives	188.08	189.079	[M-H]-	0.856517	0.140782	0.106669	1.23371	0.359399	0.300821	0.664957	1.00363	0.245828	0.605636	0.613667	0.491298	1.90651	0.705506	0.105284	0.0721601	0.426012	1.85712	0.057445	0.526043	0.723644	0.981145	0.270541	1.69929	1.09525	0.582972	0.581903	1.05422	0.395945	0.598066	0.183892	1.98165	1.26648	0.023222	0.199708	0.00832368	0.164972	0.179623	0.624043	0.0191945	17.5026	0.038367	0.370812	0.411947	0.140747
5-Hydroxyindole-3-Acetic Acid	Indole And Its Derivatives	190.06	191.058	[M-H]-	0.223229	0.354324	0.199564	0.223842	0.259509	0.270433	0.281685	0.185969	0.265043	0.28533	0.142038	0.20903	0.299859	0.335275	0.369808	0.129894	0.127197	0.259449	0.353449	0.246646	0.118704	0.350466	0.248491	0.327571	0.255631	0.262975	0.262087	0.285908	0.373744	0.290753	0.420989	0.319146	0.3756	1.39533	1.24609	1.1801	1.72988	2.12242	1.49903	0.587675	0.948174	1.1068	1.05215	0.725476	1.31487
Phe-Phe	Amino Acid And Its Derivatives	313.4	312.147	[M+H]+	1.31777	1.34925	1.47428	1.265	1.45746	1.5668	1.51062	1.7491	1.35949	1.34411	1.86136	1.89751	0.690713	1.22001	0.757481	1.36679	0.917504	1.68851	1.16363	1.28023	1.40734	1.69927	1.61352	1.20236	1.52336	1.8357	1.39177	1.55431	1.15735	1.26372	0.983998	1.92598	1.16648	0.223745	1.27454	0.290565	0.0886526	0.488344	0.483773	0.814773	0.319193	0.636158	1.67502	0.929391	0.138034
Indole-3-Carboxaldehyde	Indole And Its Derivatives	144.1	145.053	[M-H]-	0.905262	1.2016	0.846659	0.659673	0.684097	1.22988	0.950278	0.729502	1.05527	0.872033	0.646131	0.748713	0.773284	0.924538	0.741083	0.683226	1.54042	1.04808	0.718542	0.879583	0.996538	0.768584	1.10923	1.27604	1.22376	1.02729	1.71413	1.36332	1.06359	1.83947	1.05318	1.06174	0.930846	0.825545	0.819754	0.547833	1.46615	0.525285	0.634107	0.723311	0.761423	0.575589	1.55765	0.912537	0.932851
Indole-5-Carboxylic Acid (98%)	Indole And Its Derivatives	160.05	161.048	[M-H]-	0.722514	1.11521	0.843838	0.763805	1.00883	0.774275	0.615809	0.721964	0.684468	0.856751	0.696385	1.24521	0.693907	0.642809	0.614826	0.703359	0.865674	0.759474	0.706759	0.654072	1.34361	0.888817	1.01009	1.05513	0.855075	0.644362	1.04902	0.813796	0.6948	1.21766	0.944641	0.580354	1.16684	1.00897	0.962019	0.910033	2.60084	1.04132	0.783038	2.35403	1.44314	0.603551	1.33375	0.682163	1.24682
(S)-2-Hydroxybutanoicacid	Organic Acid And Its Derivatives	103.05	104.047	[M-H]-	0.799076	1.14704	0.901804	0.874692	1.14177	0.900152	1.32717	0.774703	0.575025	0.59552	1.60699	1.59075	0.710796	1.27385	0.755591	1.98143	0.686501	0.957114	0.995667	0.693445	0.519317	0.659554	1.61595	0.855842	1.01542	0.648744	1.19603	0.80235	0.765066	1.25954	0.740509	1.07524	0.84602	0.530382	0.817237	1.6445	1.4885	1.01856	0.711251	1.43445	0.611235	0.753194	1.91736	0.455076	1.94783
1,3-Dimethyluric Acid	Organic Acid And Its Derivatives	195	196.06	[M-H]-	0.0488912	3.89398	5.08625	0.339022	2.67059	1.22877	6.15006	2.91042	0.0787587	10.9195	3.56871	2.37458	5.14664	2.93127	3.09935	1.58921	2.3157	6.37722	2.1985	3.80139	2.94721	2.97929	0.493741	0.534325	3.93588	0.299557	1.47228	9.84029	2.71946	0.0979218	1.44118	2.63204	1.16545	0.838555	0.804543	2.58678	1.3086	1.14164	0.0465228	0.0256365	0.0852912	0.984273	0.569818	2.16532	0.0951726
1,7-Dimethyluric Acid	Organic Acid And Its Derivatives	195	196.06	[M-H]-	0.0634317	4.46448	5.36718	0.353739	3.1342	1.27518	6.40163	3.0734	0.0837321	10.6786	3.75103	2.42222	4.82454	3.00232	3.19252	1.65169	2.56965	6.28815	2.17649	0.0234424	2.99264	2.87467	0.40649	0.497124	3.7301	0.333243	1.4124	9.7017	2.55799	0.093212	1.39613	2.51553	1.0938	0.0424503	0.656448	2.59817	1.2264	0.988152	2.73993	0.454117	0.0810386	0.91573	0.106792	1.96789	0.103858
1-Caffeoylquinic Acid	Organic Acid And Its Derivatives	353.1	354.095	[M-H]-	0.761462	0.458919	0.346385	1.95318	0.504964	0.487933	0.168953	0.292061	0.175442	0.236653	0.156519	0.0886505	0.393788	0.128363	0.397587	0.146571	0.646902	0.130771	0.190085	0.0832596	0.156657	0.388012	0.347106	0.64296	0.139533	0.173492	0.244941	0.261941	0.364755	0.199119	0.396401	0.29696	0.233487	0.391465	1.31318	0.786501	1.3403	0.262998	0.349686	0.615058	0.25699	0.827014	0.308882	0.138461	0.688762
2,3-Dimethylsuccinic Acid	Organic Acid And Its Derivatives	145.1	146.058	[M-H]-	0.256247	0.123438	0.335682	0.380284	0.497586	0.191245	1.26678	0.293802	0.250548	0.230843	0.253132	0.226771	0.733416	0.31816	0.335466	0.562154	0.488397	0.245544	0.322036	0.397077	0.441966	0.421397	0.318851	0.438852	1.03573	0.307068	0.24942	0.56582	0.639326	0.573875	1.35067	0.401382	0.420061	1.26602	0.691534	1.17554	0.643125	2.01598	0.607488	0.90127	0.324487	0.711229	0.660615	0.365693	1.8699
2-Aminoethanesulfinic Acid	Organic Acid And Its Derivatives	108	109.02	[M-H]-	0.606409	2.38075	2.26617	1.16689	0.694076	2.41432	1.78517	0.662927	0.516442	1.07572	1.6366	1.23577	1.14868	1.20632	0.778928	0.693397	0.509637	0.440872	1.8433	0.871098	0.380961	0.909438	0.788905	0.493482	1.02111	0.864236	0.200044	0.534522	0.574407	0.477036	1.18394	0.829276	0.72696	2.81809	1.91686	2.37144	1.51345	0.344636	1.67744	1.71995	2.50391	1.00467	2.07755	0.950438	3.73626
2-Aminoethanesulfonic Acid	Organic Acid And Its Derivatives	124	125.015	[M-H]-	0.685747	1.16837	1.18661	0.689564	0.5631	1.29207	1.31481	0.839188	0.829738	1.15339	1.24939	0.841704	1.04843	0.999808	1.04167	0.839138	1.20119	1.1128	1.10508	0.690686	0.912687	1.10749	1.22314	0.791063	1.09362	1.1288	0.816936	0.901885	0.756272	0.870085	1.10605	0.877901	0.614319	1.25018	1.08624	1.3048	0.746247	0.647569	1.41357	0.829623	1.07958	1.14289	1.5418	0.761052	1.49239
2-Hydroxybutanoic Acid	Organic Acid And Its Derivatives	103	104.047	[M-H]-	0.885258	1.06839	0.938484	0.901922	1.24812	0.923163	1.44418	0.927445	0.638471	0.661379	1.54086	1.82264	0.729555	1.02455	0.841924	2.01601	0.640056	0.972261	1.11419	0.734119	0.534593	0.714374	1.60671	0.901677	1.00827	0.668993	1.23292	0.74216	0.779821	1.18896	0.67495	0.992436	0.705661	0.483296	0.719011	1.96981	1.52513	1.05282	0.54274	1.63652	0.515868	0.784485	2.48262	0.48991	2.03739
2-Hydroxyisocaproic Acid	Organic Acid And Its Derivatives	131.08	132.079	[M-H]-	0.602657	1.16982	0.999651	0.711591	0.789528	0.97076	1.26907	0.887027	0.777678	0.479675	0.942566	1.01442	0.496209	0.586817	0.716484	0.696735	0.585912	0.384382	0.563623	0.354103	0.379329	0.437958	0.697149	0.70679	0.505493	0.875827	0.647743	0.50781	0.729387	0.739066	0.934894	0.558965	0.461958	0.743009	1.17056	2.46518	2.50857	1.08847	0.607315	1.47912	2.73863	1.67727	1.59723	1.11856	0.998831
2-Methylsuccinic Acid	Organic Acid And Its Derivatives	131.04	132.042	[M-H]-	0.316122	0.509426	0.37915	0.225376	0.731243	0.520531	0.675578	0.606168	0.405836	0.540414	0.760351	0.870349	0.576618	0.432153	0.405819	0.537833	0.439386	0.29365	0.654615	0.245904	0.158512	0.216521	0.276735	0.961267	0.220782	0.395663	0.254855	0.164142	0.768591	0.25135	1.13483	0.369271	0.662527	1.09411	1.22255	0.648229	2.68962	2.40258	1.16727	0.75291	0.806051	0.594921	1.2355	0.449416	1.04312
3,4,5-Trimethoxycinnamic Acid	Organic Acid And Its Derivatives	237.08	238.084	[M-H]-	0.0922751	0.0763501	0.135552	0.885909	0.108616	0.113997	0.181037	0.162481	0.124192	0.143288	0.0886058	0.377425	0.0457173	0.319933	2.19882	0.726618	0.0709074	0.120137	0.051922	0.201182	1.66707	0.089582	0.0352389	1.50113	0.101001	0.169144	0.0261616	0.083343	3.65653	0.0604586	0.0405194	0.170915	0.0360006	0.286524	1.03902	0.0868811	3.26282	1.20678	0.131254	0.133773	3.18031	2.22702	0.34712	0.548247	0.47655
3,7-Dimethyluric Acid	Organic Acid And Its Derivatives	195	196.06	[M-H]-	0.101614	3.82038	4.89328	0.306834	2.86018	1.11481	4.89387	2.91985	0.099341	10.1998	3.51572	2.3034	4.65837	2.83819	3.01485	1.37125	2.39705	6.21696	1.8135	3.64231	2.93144	2.87794	0.471301	0.498147	3.82406	0.294094	1.45618	9.2184	0.0177972	0.142226	1.42133	2.14278	1.00129	4.17988	0.856205	2.0499	1.31442	20.7712	2.52795	0.566962	0.722159	0.97079	0.572334	2.51866	0.154741
3-Hydroxy-3-Methyl Butyric Acid	Organic Acid And Its Derivatives	117.1	118.063	[M-H]-	0.529206	0.544455	0.598559	0.458772	0.555559	0.735961	0.60639	0.636297	0.444029	0.39064	0.64638	0.694783	0.595245	0.552942	0.391507	0.440711	0.432542	0.464771	0.365269	0.39389	0.365546	0.393946	0.609892	0.372974	0.400889	0.698666	0.511737	0.369755	0.392696	0.552074	0.580091	0.367308	0.328462	1.05037	0.955529	2.45616	5.93546	1.1421	0.713785	1.47077	1.0505	1.40458	1.64121	0.741829	5.1637
3-Hydroxy-4-Methoxycinnamic Acid	Organic Acid And Its Derivatives	193.06	194.058	[M-H]-	0.740172	0.928244	1.53415	0.786053	0.457269	0.586609	0.739659	1.14568	1.20732	0.895822	0.318699	0.866583	0.653263	0.900046	1.20017	0.895335	0.783398	0.66453	1.84817	0.757979	0.436417	0.73573	0.567286	0.588336	0.40386	0.950989	0.635554	0.635949	1.01172	1.19421	0.773347	0.396763	0.684854	0.82797	2.10561	0.677271	0.743903	0.530642	0.739391	1.0127	0.950889	0.949649	1.07769	2.42501	0.880456
3-Hydroxybutyrate	Organic Acid And Its Derivatives	103.05	104.047	[M-H]-	0.207493	0.30633	0.991004	0.518212	0.728704	0.232897	0.610982	0.38806	0.112016	0.171187	0.666371	1.21145	1.19368	0.664106	0.303114	0.360428	0.524248	1.2153	2.05254	0.143877	0.346032	0.317041	0.512884	0.266335	1.2209	0.35264	1.03985	0.672652	0.265515	0.44887	0.0887093	0.396127	0.961608	0.0488428	0.278337	1.38499	0.922949	3.94172	0.432634	3.33143	0.151907	0.145126	0.189682	0.0965759	5.77662
Serotonin	Amino Acid And Its Derivatives	177	176.095	[M+H]+	1.68831	1.18865	4.42436	0.812722	1.84334	1.04889	1.03003	1.44611	0.987594	1.04294	0.344208	1.99255	0.859371	0.667918	1.54364	1.01579	1.88523	1.2883	2.0536	0.960328	1.03854	2.69843	1.26428	2.51872	0.949616	2.51266	2.24048	1.93993	1.29826	1.19199	1.80192	1.75475	0.867486	0.235654	0.503208	0.721066	0.41196	0.249331	0.680136	0.48757	1.55017	0.846989	0.402707	0.79704	0.429056
4-Hydroxy-2-Oxoglutaric Acid	Organic Acid And Its Derivatives	161	162.016	[M-H]-	0.813406	0.237595	0.564804	0.987148	0.543778	0.66401	0.577304	0.822473	1.18636	1.18073	1.16185	0.890205	0.891861	1.14876	1.01778	1.39414	0.979072	1.16174	0.951054	1.14131	1.00672	0.971438	1.47441	0.621133	0.90607	0.972914	0.931765	0.944447	1.3897	1.10807	1.06748	1.14823	0.734616	0.856676	1.63185	1.80463	1.49651	1.0821	0.654687	0.920553	0.535825	0.751953	6.76135	0.616803	0.527844
Adipic Acid	Organic Acid And Its Derivatives	145.06	146.058	[M-H]-	0.336686	0.373349	0.411872	0.297692	0.358206	0.355779	0.239193	0.0656268	0.286799	0.266768	0.234509	0.310718	0.387848	0.288213	0.350802	0.373537	0.360043	0.252524	0.585821	0.260636	0.240035	0.204803	0.274682	0.305691	0.661677	0.380985	0.252134	0.206008	0.261512	0.37751	0.471719	0.318427	0.387497	1.36062	0.729454	1.64217	0.732877	2.52345	0.54473	0.982942	0.232169	0.674257	0.609614	0.26235	1.69111
Caffeic Acid	Organic Acid And Its Derivatives	179.04	180.042	[M-H]-	0.678891	0.511012	0.217204	0.405304	0.283084	0.207038	2.15653	0.179203	0.277336	0.961849	0.304534	0.528819	0.255623	0.120348	0.179857	0.297642	0.433936	0.210477	1.03755	0.507895	1.4317	0.819888	0.441597	0.802019	0.491552	0.420865	1.13619	0.569307	0.2748	0.443847	0.19285	0.845288	3.7232	0.682818	0.476442	0.677926	0.94638	3.07592	0.938939	0.442033	1.85461	0.338146	4.01041	0.137209	4.81644
Chlorogenic Acid	Organic Acid And Its Derivatives	353.1	354.095	[M-H]-	0.515503	0.311588	0.432924	1.60214	0.238054	0.270345	0.233401	0.255769	0.188893	0.391335	0.173772	0.0808054	0.139302	0.180076	0.44964	0.221697	0.580375	0.135805	0.212081	0.0865166	0.28321	0.627658	0.357015	0.792979	0.179799	0.30765	0.314999	0.298491	0.319778	0.208444	0.109296	0.141727	0.324471	0.464332	1.32843	0.912138	1.62817	1.01197	0.328855	0.513184	0.291744	0.890866	0.404262	0.257459	0.744129
Cinnamic Acid	Organic Acid And Its Derivatives	147.05	148.052	[M-H]-	2.71723	0.708865	1.98598	1.77145	1.48371	1.67359	1.6394	0.715586	1.57251	1.37914	1.87352	1.01392	2.68355	1.07411	1.41914	1.55597	0.803868	2.55178	0.718205	0.446256	1.26957	1.86162	0.909941	0.893262	0.439262	0.40847	1.19921	2.08554	1.20516	1.8619	4.47211	2.07801	2.99679	0.841555	0.726266	0.911787	1.03058	0.888778	0.925953	0.692743	2.61722	0.916605	1.1773	0.312506	0.925518
Creatine	Organic Acid And Its Derivatives	130.07	131.07	[M-H]-	0.316442	0.504309	0.433193	0.501253	0.585705	0.430818	0.610733	0.592477	0.549862	0.609181	0.554403	0.462861	0.721704	0.780932	0.586331	0.660489	0.493785	0.318364	0.659852	0.645402	0.625364	0.425771	0.907815	0.753749	0.466167	0.561265	0.67814	0.793816	0.837414	0.506596	0.866376	0.503623	0.462618	1.34493	1.51751	0.735364	2.76825	1.78039	1.69887	0.561168	0.983029	0.52953	1.88056	0.973234	3.2607
S-Sulfo-L-Cysteine	Amino Acid And Its Derivatives	202.2	200.977	[M+H]+	1.08123	1.0029	1.05741	1.14401	1.15525	1.5722	1.52646	1.42487	1.11207	1.37178	0.849208	1.06256	1.17645	1.45281	1.26789	1.25518	0.983821	1.64111	1.26072	1.7027	1.22621	1.47716	0.882342	1.69094	0.862289	1.21765	0.848458	0.883048	2.84077	1.3165	1.00302	1.27662	1.49401	0.601353	0.997061	0.78577	0.32303	0.96572	0.641303	1.0571	0.882121	0.814709	0.426512	1.36581	0.502836
D-Lactic Acid	Organic Acid And Its Derivatives	89	90.032	[M-H]-	0.368108	0.476213	0.429744	0.476917	0.401221	0.546243	0.836056	0.489478	0.781949	0.5338	0.695723	0.522147	0.593091	0.470952	0.509718	0.542288	0.561112	0.355774	0.517681	0.369662	0.344894	0.453329	0.567032	0.404813	0.432698	0.483685	0.346129	0.420994	0.364285	0.468575	0.585219	0.442615	0.427021	1.46996	0.536933	2.1372	1.82131	0.769431	1.55174	0.969171	1.29538	2.15762	1.5249	0.879944	2.12138
Dl-P-Hydroxyphenyllactic Acid	Organic Acid And Its Derivatives	181	182.058	[M-H]-	0.65882	1.52604	0.855938	0.67051	0.910103	0.85745	0.834131	0.68273	0.561995	0.559083	0.938195	0.80679	0.459339	0.340433	0.618503	0.428066	0.816505	0.448211	0.367595	0.25862	0.406515	0.472565	0.426908	0.785144	0.502686	0.85582	0.400722	0.269129	0.473889	0.5471	0.639628	0.578205	0.420661	0.938738	2.09802	1.17862	3.83548	1.72763	0.854938	0.691939	0.959554	1.18174	1.61948	1.34339	1.08814
Dodecanedioic Aicd	Organic Acid And Its Derivatives	229.15	230.152	[M-H]-	0.551209	0.641834	0.444563	0.649673	0.77925	0.595306	0.581947	1.08004	0.357227	0.61222	0.673311	0.53244	1.10861	0.577984	0.612621	0.44457	0.576424	0.71708	1.45172	0.45506	0.613221	2.20241	1.11749	1.11143	2.49451	0.729703	1.44425	1.20495	0.572414	0.594604	1.0427	0.79403	1.00622	1.14486	1.42068	1.13753	0.651777	3.16084	0.99409	0.960884	0.789953	1.08691	1.21443	0.663914	0.575724
Guanidineacetic Acid	Organic Acid And Its Derivatives	116.1	117.054	[M-H]-	0.457487	0.243081	0.443528	0.540567	0.698813	0.614022	0.419749	0.716638	0.329109	0.424329	0.396879	0.811311	0.673193	0.622128	0.579051	0.524245	0.641708	0.684182	0.555512	0.410625	0.301619	0.517768	0.643957	0.498224	0.87767	0.334329	1.5091	0.827966	1.33451	0.363454	0.410195	0.379362	0.323593	0.671689	1.84674	1.3008	0.656624	1.1312	0.932651	0.429707	0.751376	1.36074	1.26979	2.16561	3.16949
Trans-4-Hydroxy-L-Proline	Amino Acid And Its Derivatives	132.058	131.058	[M+H]+	1.087	0.851465	0.947186	1.02043	1.03661	1.00887	1.04661	1.06244	1.07486	1.08431	0.993192	0.97466	1.00792	1.0588	1.07782	1.00496	1.13793	1.06484	1.07273	1.05835	1.08346	1.12135	1.07149	1.10658	1.11519	1.05666	1.07141	1.01048	1.02885	0.981558	0.930374	1.05046	1.07161	0.960201	1.06844	0.841604	0.869471	1.0811	1.05937	0.947887	1.0113	0.774459	1.03858	1.14471	0.896089
Hippuric Acid	Organic Acid And Its Derivatives	178.1	179.058	[M-H]-	1.29309	0.54593	0.0836005	0.206654	0.402063	0.340656	1.44167	0.240834	0.262553	0.996424	0.539219	0.572086	0.546344	0.0763845	0.0496261	0.365047	0.617633	0.551336	0.758605	0.4257	1.88384	0.725153	0.416838	0.917589	0.441241	0.672309	0.985553	0.406155	0.221521	0.38473	0.20737	0.598281	2.73505	0.716795	0.353295	0.784646	1.03822	3.8552	0.856845	0.466087	3.16225	0.431377	2.05779	0.137955	5.00405
Hydrocinnamic Acid	Organic Acid And Its Derivatives	149.07	150.068	[M-H]-	4.2571	0.413905	0.541875	0.591987	0.957819	1.35947	2.6733	0.370447	0.501449	1.26106	0.679848	1.52161	2.11672	0.427794	0.470075	0.428701	1.1733	2.41113	0.359952	1.60884	2.53469	2.87071	0.550214	2.36364	2.13875	0.564566	1.95011	1.93122	0.60686	1.88523	1.24212	2.89697	2.02047	0.22142	0.618562	0.636169	1.0669	0.285589	0.312409	0.26425	11.0339	0.883729	0.759681	1.30036	0.891829
Kynurenic Acid	Organic Acid And Its Derivatives	188.04	189.043	[M-H]-	0.0553922	0.202714	0.102682	0.104243	0.192671	0.119092	0.281919	0.149045	0.109403	0.154708	0.167624	0.236038	0.16046	0.104406	0.132806	0.0496521	0.203601	0.0996416	0.111457	0.083714	0.114536	0.0836035	0.0970336	0.1541	0.10479	0.182568	0.150589	0.11237	0.145891	0.0741527	0.142333	0.112094	0.171823	2.1021	1.35374	0.500425	2.44854	3.23128	0.39972	0.662079	0.321903	0.561065	2.59095	0.493531	5.88762
Trimethylamine N-Oxide	Amino Acid And Its Derivatives	76	75.0684	[M+H]+	0.702414	1.36169	0.0612628	1.2385	1.50397	0.23426	1.64822	0.33922	0.206942	0.511484	0.229581	0.459301	0.261118	0.307035	0.0975016	0.202516	0.208053	0.404145	0.141254	0.465538	0.432513	0.503489	0.230318	0.201251	0.247367	0.0705266	0.208892	0.354117	0.226175	0.545261	0.165174	0.203863	0.484	2.40962	3.93052	0.0668714	1.11661	5.41761	6.07669	0.179954	0.954519	0.138958	2.43539	1.35552	0.344803
L-Tartaric Acid	Organic Acid And Its Derivatives	149	150.016	[M-H]-	0.231183	0.51006	0.28041	0.54386	0.507184	0.509913	0.864942	0.202172	0.676997	0.382186	0.79043	0.364895	0.290773	0.558228	0.574935	0.867991	0.680358	0.258486	0.610597	0.551739	0.867688	0.462345	0.806834	0.393941	0.579781	0.450313	0.307823	0.401186	0.507124	0.46435	1.13675	0.150719	0.597794	2.20867	1.20701	2.37931	2.91597	1.14893	1.80832	0.856418	1.16711	1.46859	1.24309	1.10287	2.05725
L-Homoserine	Organic Acid And Its Derivatives	118.1	119.058	[M-H]-	0.858098	1.76418	0.961367	0.910777	1.01275	1.72726	0.654067	1.27183	1.08911	1.13201	0.846984	1.74295	1.32987	1.41381	1.17178	0.868027	0.6032	0.660672	1.21628	1.42113	0.911206	0.758581	0.933865	1.26493	0.648341	1.71081	0.546594	1.10518	1.31772	1.29497	0.954571	0.835711	1.24572	1.00491	0.546611	0.860746	0.796651	0.70008	1.11084	1.69865	0.840519	1.25487	1.07498	0.736305	1.93276
L-Kynurenine Hydrate	Organic Acid And Its Derivatives	207.1	208.085	[M-H]-	0.753146	1.06947	0.749339	0.723869	0.77152	0.623931	0.458012	0.813966	0.651368	0.83476	0.762706	0.713934	0.616139	0.562334	0.69753	0.382829	0.780567	0.613878	0.408747	0.438016	0.554269	0.580297	0.6151	0.846626	0.775539	0.537563	0.635822	0.560219	0.576679	0.514051	0.925405	0.595903	0.533174	3.13587	2.024	0.763417	1.27414	1.79027	1.26315	0.693766	0.920702	1.69442	1.61858	1.30188	2.0404
L-Pipecolic Acid	Organic Acid And Its Derivatives	128	129.079	[M-H]-	0.600301	0.795545	0.851091	0.521594	0.520399	0.527538	0.318257	0.790349	0.584526	0.693603	0.917798	0.885047	1.12388	0.64661	0.767252	0.957061	0.416423	0.803567	0.652981	0.44099	0.38845	0.630504	0.82186	0.565289	0.65422	0.618476	0.522425	0.72371	1.06403	1.43103	0.965242	0.634555	1.23175	1.27399	0.791776	1.95893	0.590666	0.903456	1.46492	0.778041	1.18109	0.859855	0.684028	0.697062	1.22379
Malonicacid	Organic Acid And Its Derivatives	103	104.011	[M-H]-	0.207906	0.334633	0.994447	0.53208	0.668155	0.231283	0.590409	0.361663	0.110398	0.155259	0.642094	1.24851	1.26031	0.701969	0.305357	0.387121	0.502152	1.22386	2.18031	0.138937	0.322657	0.353529	0.497461	0.27103	1.27198	0.379878	1.02054	0.719735	0.296838	0.479499	0.0988324	0.400168	0.982679	0.0503702	0.26862	1.50753	1.00388	4.10267	0.424209	3.37668	0.16539	0.159004	0.200199	0.0992145	6.06779
Mandelic Acid	Organic Acid And Its Derivatives	151	152.047	[M-H]-	0.11076	0.176202	0.137419	0.233549	0.136319	0.110083	0.127545	0.111186	0.10374	0.155174	0.140418	0.112679	0.114978	0.273977	0.119069	0.443023	0.166561	0.093172	0.0951253	0.17316	0.0891379	0.0894188	0.128583	0.143052	0.0803408	0.0955941	0.128572	0.117995	0.0830274	0.12261	0.620205	0.144019	0.425144	2.07387	0.720783	0.179933	5.34058	0.863107	0.27259	0.580805	0.275613	1.01808	0.6221	0.38515	2.32248
Methylmalonic Acid	Organic Acid And Its Derivatives	117.02	118.027	[M-H]-	0.499765	0.876897	0.809127	0.647176	0.817867	0.641739	0.913837	0.936988	0.826815	1.08997	0.894155	1.23116	0.781593	0.760183	0.703524	0.744911	0.816393	0.659968	0.772031	0.810962	0.748127	0.542965	0.66522	0.863531	0.898705	0.747221	0.694912	0.759488	0.748257	0.842579	0.94616	1.07672	0.661324	0.969012	0.835834	1.47961	3.1284	0.82422	0.706095	0.954312	0.911189	1.01459	0.707071	0.91286	1.50363
Phenyllactate (Pla)	Organic Acid And Its Derivatives	165	166.063	[M-H]-	0.263623	0.562998	0.37573	0.318515	0.396164	0.43197	0.363946	0.306496	0.359363	0.320535	0.451659	0.397816	0.203751	0.27185	0.355586	0.26925	0.41837	0.189393	0.22756	0.120487	0.232225	0.27537	0.271199	0.390462	0.322485	0.375069	0.253478	0.192438	0.226362	0.287304	0.345423	0.264205	0.251852	0.970822	1.40745	2.0846	3.99364	0.395731	1.47947	4.33598	2.46518	1.03719	1.23845	2.2186	1.03736
Pyrrole-2-Carboxylic Acid	Organic Acid And Its Derivatives	110.1	111.032	[M-H]-	0.661513	2.6139	0.305026	1.32616	0.220851	0.266582	1.4947	0.341159	1.01833	0.277194	1.91729	1.14398	2.1759	0.973243	0.681745	0.715447	0.960833	1.18801	0.85003	0.534063	0.788899	2.49981	0.930381	1.23753	1.18495	0.86766	0.625329	0.237268	0.679325	0.709624	0.491288	1.03074	1.32369	1.22144	0.931869	1.36539	1.44323	1.94049	0.644139	1.44912	1.54155	0.90181	1.6192	0.558226	1.51177
Sebacate	Organic Acid And Its Derivatives	201.12	202.121	[M-H]-	0.189976	0.347508	0.346302	0.161926	0.36901	0.276511	0.768923	0.281133	0.215753	0.241566	0.133646	0.306317	0.36169	0.417114	0.351904	0.416573	0.251326	0.310016	0.446737	0.0997232	0.241214	0.143718	0.358293	0.169683	0.22842	0.187616	0.362666	0.248985	0.170385	0.340797	0.179913	0.155457	0.194573	1.74309	1.30691	0.909492	1.06635	4.85237	1.23353	1.44012	0.357197	0.781081	2.38011	0.457706	2.53117
Shikimic Acid	Organic Acid And Its Derivatives	173.05	174.053	[M-H]-	1.12902	1.10691	1.17338	0.88709	0.862903	0.67243	1.83448	1.24686	0.793049	0.905184	0.728349	0.599068	0.524988	0.704406	0.503592	0.889737	1.16559	0.517869	0.715455	0.932217	0.912993	0.695146	1.25058	0.945052	1.14326	0.593559	1.01597	0.873519	1.26627	1.58176	0.995322	1.0606	1.19083	0.94611	0.904454	1.04275	0.690724	0.854341	0.849672	0.81642	0.855918	0.770317	1.10412	1.02901	0.900262
Vanillic Acid	Organic Acid And Its Derivatives	167.04	168.042	[M-H]-	0.24647	0.393239	0.56754	0.1884	0.4629	0.0843334	0.106138	0.242853	0.228849	0.179985	0.12891	0.0829553	0.352408	0.320233	0.376919	0.15422	0.384518	0.732791	0.194993	0.31123	0.257366	0.175694	0.595641	0.198258	0.131723	0.144543	0.337325	0.220826	0.0905311	0.364576	0.258927	0.189923	0.346254	0.665619	3.67254	0.567567	2.0961	3.85251	2.55899	1.06274	1.42578	0.309849	2.8755	0.916151	0.680847
Α-Hydroxyisobutyric Acid	Organic Acid And Its Derivatives	103.05	104.047	[M-H]-	0.834634	1.25665	0.963534	0.852678	1.31112	1.07762	1.22383	0.759279	0.540613	0.669051	1.2472	1.59124	0.622892	0.972578	0.788381	1.66749	0.670075	0.962	1.16347	0.766133	0.731895	0.519888	1.47818	0.890809	1.04641	0.705682	1.14994	0.825026	0.938667	1.337	0.823927	1.05817	0.687396	0.400372	0.618633	1.50235	1.20249	1.07187	0.774542	1.2822	0.586885	0.632254	2.23835	0.607628	1.78025
Txb2	Eicosanoids	369.1	370.2	[M-H]-	1.47522	0.911842	1.85306	1.14793	1.1333	0.971981	1.16666	0.661797	0.625619	1.92794	1.03629	1.118	0.791533	1.70624	0.497874	1.10474	0.592349	0.510724	1.77698	0.848617	1.16765	0.912932	0.71538	1.09186	1.03277	0.973059	0.791322	1.95707	0.395407	0.906002	0.291141	1.42263	0.229362	0.132592	0.464228	0.780925	0.204115	0.392914	1.97048	0.528656	0.804895	1.54341	2.34141	1.53753	1.5298
Pgd2	Eicosanoids	351.1	352.1	[M-H]-	0.286814	1.81298	1.27339	0.984569	0.337765	0.457552	0.381899	0.387199	1.17888	0.905239	0.282881	0.367116	0.771275	0.358707	0.287717	0.642078	2.47453	0.322791	1.89747	0.823784	0.448932	0.751623	0.519069	1.06115	0.931784	1.01759	0.811064	1.84808	0.699536	2.02798	0.878139	1.21857	1.02114	0.40738	0.807111	1.78153	1.97715	0.809294	29.9378	1.16849	2.38344	2.93067	4.58991	2.05217	1.2429
15-Hete	Eicosanoids	319.1	320.1	[M-H]-	0.274309	0.441135	0.739249	0.526107	0.142371	0.458259	0.39181	0.231661	0.295237	0.910853	0.55114	0.350585	0.340097	0.410307	0.16506	0.472938	0.0947544	0.254913	0.440293	0.160046	0.30928	0.322104	0.374334	0.235775	0.417125	0.256328	0.167413	0.76951	0.145327	0.278208	0.629494	0.465549	0.173964	0.696038	0.901644	2.61777	0.379139	0.698984	2.25223	0.827342	0.652799	4.31484	2.57934	1.20045	2.21039
12-Hete	Eicosanoids	319.1	320.1	[M-H]-	0.251234	0.403371	0.717377	0.489546	0.130633	0.420359	0.370426	0.207798	0.281804	0.783434	0.582967	0.321799	0.327095	0.387315	0.171638	0.456163	0.0924955	0.301926	0.539077	0.189331	0.306312	0.384134	0.403808	0.241375	0.432453	0.253617	0.173069	0.765593	0.139729	0.296001	0.602584	0.433089	0.192579	0.675554	1.03854	3.41098	0.353181	0.620462	3.14037	0.740673	0.612112	4.12903	2.92409	1.13086	2.0782
Lysops 22:6 (2N Isomer)	Lipids-Phospholipid	568.27	569.27	[M-H]-	1.71579	2.32869	3.6092	2.74868	1.9604	4.01222	4.67003	1.08996	1.3864	1.74159	1.27128	2.17269	1.45723	1.07901	1.07387	1.18278	0.757776	0.654883	1.19347	0.317909	0.324539	0.52393	1.0959	0.649892	1.08563	0.625694	0.532178	0.612726	0.585644	0.557678	0.658679	0.56036	0.202142	0.975034	0.528119	2.47706	0.45177	0.941984	1.61798	0.558656	0.649032	2.52649	1.09784	0.598384	1.97366
Lysops 22:6	Lipids-Phospholipid	568.27	569.27	[M-H]-	1.16822	1.84901	2.05896	1.92977	1.58112	2.12384	2.15062	0.796553	0.78505	1.05515	1.53758	0.999829	1.23253	0.937437	0.781584	1.00793	0.596924	0.572343	1.3468	0.348997	0.39151	0.307729	1.00675	0.696813	0.994476	0.769206	0.416727	0.593648	0.506106	0.850016	0.819075	0.447881	0.434496	0.32934	0.578931	2.31618	0.495814	0.830988	1.46922	0.629478	0.746612	2.20103	0.946431	0.612005	1.98099
Lysops 22:5 (2N Isomer)	Lipids-Phospholipid	570.3	571.3	[M-H]-	1.20013	1.27621	1.63307	1.07773	0.840236	1.38003	1.0608	1.0831	0.608817	0.757012	1.11629	0.962907	0.833531	0.985018	1.00606	1.19986	1.20292	1.34298	1.26915	1.28018	1.10494	1.05069	0.706509	0.930227	0.852416	0.945958	1.06859	1.1753	0.966975	1.30629	1.06958	1.22433	0.988431	0.454582	0.732488	1.0407	0.509773	0.382797	0.347097	0.442269	1.06817	0.868202	0.730343	1.30433	1.68589
Lysops 22:5	Lipids-Phospholipid	570.3	571.3	[M-H]-	0.967008	1.26431	1.14523	1.02614	0.878196	0.905441	0.648943	0.738252	0.845329	0.757807	1.03371	0.97994	1.18473	1.20295	0.902893	1.2584	1.12577	1.07723	0.804908	0.788121	0.698056	1.12142	0.640521	0.704683	1.34715	0.998612	1.36433	0.739422	1.06866	1.30092	1.12558	1.26534	0.728821	0.470871	0.306862	1.26337	0.337559	0.852487	0.821815	0.774302	0.469669	0.886064	0.544591	0.738641	1.15083
Lysopg 18:1 (2N Isomer)	Lipids-Phospholipid	509.29	510.29	[M-H]-	0.836124	0.996075	0.978604	0.999044	0.972821	0.876473	0.600261	0.89475	0.843925	0.884504	0.846773	0.749326	0.84336	1.05389	0.945885	1.2409	0.783417	1.00953	0.98135	0.896107	0.58623	1.09937	1.04243	1.26628	1.11486	1.44313	1.06351	1.42318	1.58223	1.41685	1.80688	1.45782	1.04045	0.968819	0.963787	0.896711	0.758469	0.802444	0.969158	0.821184	0.868562	0.918088	0.759672	0.915746	1.14811
Lysopg 18:1	Lipids-Phospholipid	509.29	510.29	[M-H]-	0.827155	0.985794	1.00456	0.903225	0.753792	0.862886	0.946	0.782238	0.852889	0.75409	0.887102	0.669358	0.805282	0.906258	0.919576	1.16644	0.789927	0.948145	1.09118	0.986848	0.907027	0.990594	0.770159	1.01545	1.11368	1.23614	1.20161	1.30042	1.49037	1.52754	1.36105	1.07527	0.930737	0.660226	0.55584	0.83	0.421526	0.557298	0.72656	0.525733	0.720283	0.842014	0.520752	0.712043	0.942739
Lysope 18:1 (2N Isomer)	Lipids-Phospholipid	478.3	479.3	[M-H]-	0.521652	1.1376	0.968312	1.03514	0.624872	0.859847	1.20117	0.515899	1.15683	0.664695	0.635818	0.372103	0.483069	0.970839	1.1588	0.602042	1.06372	1.14348	0.90949	0.590783	0.499607	0.601766	0.500045	0.823297	0.629894	1.35217	0.614895	1.27019	1.35904	0.825572	1.2893	0.813571	1.20808	1.68336	1.32296	3.13028	0.557528	0.760587	0.907683	0.696748	1.03127	1.34345	0.94806	0.607589	0.95353
Lysope 18:1	Lipids-Phospholipid	478.3	479.3	[M-H]-	0.583627	1.1413	1.02225	0.918167	0.632244	0.902153	0.983561	0.564859	1.11562	0.615027	0.523677	0.355631	0.428266	1.00621	0.972571	0.580279	1.03892	1.02167	0.833616	0.522723	0.467266	0.545608	0.461616	0.723403	0.555883	1.25632	0.576685	1.34378	1.38966	0.808254	1.35033	0.864814	1.18633	1.74258	1.28889	2.7448	0.683892	0.910259	0.885434	0.848767	1.0226	1.68486	0.987591	0.774341	1.13359
Lysope 18:0 (2N Isomer)	Lipids-Phospholipid	480.3	481.3	[M-H]-	0.599565	1.27182	0.861308	0.83719	0.650987	0.697848	1.15875	0.44699	0.94067	0.506632	0.568569	0.330851	0.402176	0.892832	1.00285	0.562604	1.04831	1.02122	0.885031	0.632313	0.500527	0.635984	0.405859	0.723401	0.568452	1.25678	0.657254	1.41843	1.48729	0.934314	1.38271	0.886796	1.20424	1.37257	1.24759	3.19751	0.566456	0.805714	0.874152	0.739096	0.896576	1.65033	1.0393	0.662128	1.02144
Lysope 16:0 (2N Isomer)	Lipids-Phospholipid	452.3	453.3	[M-H]-	0.575055	0.921909	1.00283	0.779565	0.967263	1.02126	0.882312	0.667469	0.960272	0.64489	1.01691	0.537125	0.416945	0.98124	1.03797	1.10489	0.728131	0.86665	1.18928	0.710615	0.599197	0.67017	0.709562	0.784774	0.843993	0.841202	1.01729	2.35559	0.849818	0.977717	1.63677	0.990288	0.931612	1.00891	0.817864	2.2697	0.70188	0.877627	1.14373	1.38467	1.20746	1.7413	1.28242	0.575626	1.55422
Lysope 16:0	Lipids-Phospholipid	452.3	453.3	[M-H]-	0.584665	0.920064	1.03101	0.806795	1.00442	1.03903	0.903904	0.679443	0.970921	0.654585	1.04627	0.54285	0.424137	0.976351	0.99927	1.08565	0.754697	0.891652	1.17641	0.719188	0.597329	0.688484	0.727393	0.781433	0.829962	0.883261	1.0278	2.34501	0.820988	0.993866	1.60575	0.982083	0.968793	1.04748	0.820584	2.25258	0.664571	0.879211	1.12536	1.37068	1.21485	1.72097	1.27236	0.545559	1.51327
Lysope 14:0 (2N Isomer)	Lipids-Phospholipid	424.2	425.2	[M-H]-	0.325523	0.658293	0.614688	0.544786	0.655896	1.06276	0.73927	0.416839	1.13854	0.527898	0.830911	0.209546	0.246963	0.753944	1.3728	1.09153	1.03498	0.625274	0.56542	0.647629	0.773612	0.615733	1.20832	1.19775	1.02792	1.12673	1.08301	4.54411	1.55161	0.669741	3.06981	0.827345	0.968806	1.13379	0.983737	1.0469	0.606422	0.850979	0.926877	0.314188	1.08189	0.991926	0.680684	0.777738	0.864344
Allo-Threonine	Amino Acids And Derivatives	120.1	119.1	[M+H]+	3.48868	1.38214	1.93746	4.61934	2.46377	1.49092	3.03144	1.2303	1.04229	1.51788	1.48656	1.5162	1.26688	1.35497	1.45515	1.44544	1.16979	1.44778	1.0755	1.84246	1.18687	1.394	1.56163	1.83571	0.832146	1.73338	0.524024	1.97615	0.899749	0.713803	0.269049	0.676665	0.957761	0.296572	1.76652	0.495175	0.0972162	1.33252	0.163671	2.13372	0.54653	0.368531	0.591637	2.07848	0.322825
Lysope 14:0	Lipids-Phospholipid	424.2	425.2	[M-H]-	0.32882	0.656863	0.568763	0.55139	0.679588	0.980981	0.669247	0.406069	1.09557	0.50324	0.755531	0.187406	0.229434	0.689595	1.31023	1.07859	1.02822	0.623475	0.568961	0.659647	0.731355	0.655655	1.14544	1.18315	0.98928	1.02511	1.08072	4.49741	1.59076	0.694857	2.98445	0.839506	0.995968	1.17233	0.944559	1.11013	0.541764	0.885831	0.959108	0.29322	1.08623	0.981472	0.67602	0.734123	0.819796
Lysopa 18:0 (2N Isomer)	Lipids-Phospholipid	437.27	438.27	[M-H]-	1.30709	1.89915	2.7695	1.72996	1.09401	1.02544	0.632995	0.925803	1.68155	1.58642	1.0602	1.50963	2.03296	1.43517	1.33167	0.867203	1.7708	1.4722	0.92628	0.686557	1.36433	0.970218	0.995178	1.05168	1.26953	1.18982	1.38946	0.510723	1.1705	1.63257	1.42227	1.38248	0.964998	0.592129	0.511577	0.787171	0.47845	0.489872	0.590662	0.725477	0.724954	0.874922	0.519489	0.835561	0.888232
Lysopa 18:0	Lipids-Phospholipid	437.27	438.27	[M-H]-	0.903036	1.18089	1.17641	1.09914	0.822517	0.802493	0.845885	1.02738	1.01044	0.812267	0.871339	0.939586	1.17392	0.968709	1.027	1.05936	0.862911	1.3208	1.0343	1.05098	0.803771	0.997389	0.929256	0.841205	0.882785	1.15529	1.11525	1.04743	1.31652	1.65648	1.59861	1.24577	0.882077	0.731149	0.555782	0.673576	0.423165	0.530205	0.811047	0.725026	0.702432	1.03387	0.499679	0.888017	0.831697
9,10-Dihome	Linoleic Acid And Derivatives	313.1	314.1	[M-H]-	0.473228	0.757358	1.52691	0.987513	0.688527	0.496802	1.19887	0.609677	0.260868	0.316215	0.41721	0.466695	0.340672	0.545207	0.859408	0.261655	0.500746	0.422481	1.1218	0.426438	0.347075	0.819598	0.461501	0.641099	0.20766	1.06233	0.625594	1.39801	0.503442	1.25791	2.75992	0.808967	2.16118	1.87678	0.867311	2.35281	0.104669	0.207906	0.0874194	0.169184	0.323979	1.71631	1.14606	0.333157	0.623662
12,13-Eode/12,13-Epome	?Linoleic Acid And Derivatives	295.1	296.1	[M-H]-	0.367352	0.558999	0.963288	0.671268	0.439036	0.336221	0.710011	0.41841	0.396892	0.537401	0.537375	0.561668	0.59568	0.622102	0.460725	0.608059	0.342609	0.626456	0.976273	0.30825	0.51898	0.430283	0.373797	0.708173	0.518422	1.97541	0.41886	1.14162	0.439566	0.70289	0.995941	0.53867	0.842937	1.22262	0.415802	3.04912	1.30582	0.408024	1.08233	1.73927	0.4879	2.44716	0.944959	0.42878	1.8669
N-Acetylhistamine	Amino Acids And Derivatives	154.1	153.1	[M+H]+	0.665096	0.40356	0.854498	0.511129	0.663327	0.502122	0.712687	0.828967	0.520149	0.827525	0.660677	0.811541	0.537895	0.494887	0.557344	0.627753	0.783993	0.61254	1.13652	0.602531	0.560892	0.633492	0.742531	0.598996	0.861034	0.685319	0.528067	0.677828	0.563497	0.588681	0.714946	0.443016	0.945816	1.36596	0.975366	1.78189	0.831375	0.907847	1.79882	2.01745	1.84458	0.725442	1.45959	1.08935	1.03417
γ-Linolenic Acid(C18:3N6)	Free Fatty Acid	277.2	278.22	[M-H]-	0.55478	0.914277	1.14446	0.792188	0.734517	1.01418	0.900685	0.716729	0.463042	0.580905	0.940675	0.588381	1.16466	1.05293	0.822489	1.08313	1.06976	1.49639	1.57738	0.500856	0.715577	0.841499	0.591556	1.25334	0.851466	1.42036	0.882859	1.34055	1.28313	1.51797	1.3398	2.0015	1.79936	0.314518	0.201014	1.6563	0.480715	0.707698	0.804079	1.0222	1.2268	0.659519	0.635348	0.414824	0.603741
Tridecanoic Acid	Free Fatty Acid	213.2	214.19	[M-H]-	0.360781	0.594689	0.494227	0.331218	0.430235	0.287282	0.74071	0.884555	0.425295	0.112564	0.455413	0.462084	0.658307	0.7845	0.772473	0.607187	0.453159	0.501221	0.732294	0.935532	1.12313	0.468476	0.754587	0.394947	1.47703	0.444773	0.76778	3.17868	2.20926	0.821293	2.4557	2.1287	0.679714	0.905335	0.425222	0.986208	0.630305	0.658116	0.564269	0.994839	1.08803	0.865001	0.521061	1.02389	0.535597
Palmitoleic Acid (C16:1)	Free Fatty Acid	253.2	254.2	[M-H]-	0.492657	0.633724	1.29597	0.942281	1.13967	1.12205	0.635956	0.825911	0.406492	0.660495	1.07109	0.857714	1.10066	0.800562	0.8365	1.06536	0.545286	0.667023	2.04246	0.359706	0.731494	0.553282	0.970898	1.14407	1.05608	0.603763	1.20418	1.86547	0.914955	0.848717	0.95151	1.40764	1.40757	0.220659	0.25758	2.04687	0.433539	1.12858	0.87918	1.54365	0.999857	0.491981	0.487084	0.420738	0.780692
Hexadecanoic Acid (C16:0)	Free Fatty Acid	255.2	256.24	[M-H]-	1.52986	2.02687	1.89168	2.09508	2.2779	2.34806	0.112447	0.906169	1.46066	1.2609	1.15524	1.37265	1.34952	1.2164	1.13024	1.1751	1.0396	1.16431	1.26814	0.846507	1.17198	1.01741	1.17823	1.20539	1.39688	1.2253	1.41844	1.18269	0.983422	1.43852	1.40424	1.41297	1.26673	1.18186	0.95283	1.46871	1.37125	1.14767	1.04011	1.15664	1.28073	1.12098	1.06762	0.531795	0.867041
Linolelaidic Acid (C18:2N6T)	Free Fatty Acid	279.2	280.24	[M-H]-	1.53579	1.59769	1.58391	1.70654	1.83517	1.72959	0.664639	1.19561	1.02569	0.914614	1.72419	1.62591	1.69771	1.35553	1.21838	1.29304	1.09776	1.08374	1.29227	0.825149	0.966886	0.950783	1.15491	1.32245	1.26798	1.25956	1.05837	1.13734	0.925815	1.16148	1.06423	1.2914	1.33213	0.551615	0.372843	1.3353	0.781945	0.652145	0.945674	1.33991	1.09626	0.888215	0.931211	0.485995	0.64427
Linoleic Acid (C18:2N6C)	Free Fatty Acid	279.2	280.24	[M-H]-	1.53421	1.57443	1.565	1.69311	1.85598	1.75366	0.703522	1.21056	1.06423	0.944894	1.71249	1.65927	1.71242	1.36872	1.22871	1.30694	1.09729	1.10971	1.3009	0.833054	1.00017	0.947547	1.15414	1.31452	1.27606	1.24887	1.04411	1.12038	0.922069	1.15453	1.04146	1.28474	1.29864	0.564428	0.378021	1.33994	0.780355	0.657909	0.928264	1.30294	1.09853	0.872232	0.925017	0.480015	0.639389
Dodecanoic Acid(C12:0)	Free Fatty Acid	199.17	200.17	[M-H]-	0.466237	0.843938	0.669222	0.463452	0.741011	0.64624	1.034	0.806727	0.422241	0.602976	0.970057	0.617755	0.667721	0.515833	0.496546	0.676002	0.604586	0.821471	1.5931	0.514001	1.06033	1.20431	2.41122	0.861468	2.71824	1.71286	2.82561	8.16015	0.794068	1.85587	0.683334	0.802466	1.20792	0.292329	0.502868	1.41207	0.408855	0.734971	0.416422	0.456708	0.652076	0.6715	0.342833	0.348904	0.553336
Elaidic Acid (C18:1N9T)	Free Fatty Acid	281.3	282.25	[M-H]-	1.51815	1.7951	1.89322	2.11183	2.56239	2.3586	0.108754	0.896523	1.28466	1.18813	1.22663	1.37827	1.37599	1.21677	1.00643	0.995282	1.10059	0.91276	1.11409	0.734997	1.1379	0.799503	1.09566	1.27179	1.09784	0.932116	1.29104	1.16354	1.0211	1.00888	1.15544	1.40811	1.39387	0.857782	0.781699	1.46364	1.39151	1.30691	1.1707	0.974238	1.42732	0.924957	0.920861	0.573704	1.12804
Cis-5,8,11,14,17-Eicosapentaenoic Acid(C20:5N3)	Free Fatty Acid	301.1	302.22	[M-H]-	0.650733	1.38775	0.980756	0.536166	1.69986	1.0597	0.871516	0.709165	0.434092	0.470304	1.40775	0.572044	1.6238	0.873029	1.5412	1.86523	0.666894	1.23618	1.2812	1.60572	0.638988	1.04346	0.856297	0.890254	0.593299	0.430912	1.28524	0.790322	1.51636	2.91251	3.58499	1.16512	0.750962	0.677275	0.140427	1.7515	0.182822	0.431474	1.93125	0.475446	0.692119	0.279134	0.385153	0.360421	0.426868
L-Tyrosine	Amino Acid	182.1	181.074	[M+H]+	0.953677	1.18312	1.00996	0.972829	1.02998	0.987163	1.07966	1.09496	1.09338	1.13818	1.22343	0.971049	1.05632	0.9271	0.972151	0.901885	1.02291	1.01248	1.01951	1.06749	0.976438	0.931851	0.945614	1.1234	1.03233	1.19959	1.00219	0.959794	1.09301	1.23898	1.26046	1.22225	1.11781	0.748158	1.05728	1.22304	0.908524	0.796099	0.687147	0.854356	0.944549	1.05703	1.02112	0.774164	0.964158
S-Adenosyl-L-Homocysteine	Amino Acids And Derivatives	385.1	384.1	[M+H]+	0.473761	0.663935	0.413422	0.421761	0.49904	0.503306	0.500418	0.455565	0.351833	0.471585	0.342273	0.186787	0.428852	0.410749	0.426364	0.281429	0.259954	0.321969	0.268688	0.250232	0.188124	0.246575	0.327358	0.253766	0.177453	0.20437	0.339899	0.261918	0.417912	0.365702	0.327357	0.431061	0.351927	1.21746	1.72626	0.725677	2.36819	1.69063	1.14933	0.457753	0.679448	0.622407	2.6085	0.643485	1.65242
Cis-4,7,10,13,16,19-Docosahexaenoic Acid(C22:6N3)	Free Fatty Acid	327.2	328.24	[M-H]-	1.07156	1.94702	1.75957	0.931163	2.26799	1.73677	0.760874	1.11668	0.667422	1.04343	2.13339	1.65387	1.54322	1.25785	1.2891	2.06493	0.949087	1.44155	1.92131	1.20829	1.19272	0.887191	1.40311	1.49185	1.16692	0.871816	1.78622	1.54565	1.22697	2.41134	1.54634	1.51958	1.02138	0.235614	0.275568	0.912818	0.365584	0.460831	1.03749	0.591982	0.708788	0.498467	0.574816	0.373846	0.638659
Cis-11,14-Eicosadienoic Acid (C20:2)	Free Fatty Acid	307.2	308.27	[M-H]-	0.84834	1.67281	2.15305	1.20474	1.97182	2.14921	0.0347435	0.758384	0.674639	0.693192	1.36502	1.34994	1.28014	1.32487	1.08866	1.18999	0.806391	1.22532	1.80942	0.464734	0.735322	0.566752	0.959582	1.49839	0.874719	0.991539	1.17353	2.4082	0.960341	1.39485	1.29119	1.97087	1.41374	0.387347	0.257223	1.22566	0.472482	0.720956	0.816262	0.980073	1.17531	0.571942	0.612548	0.390923	0.745214
Arachidonic Acid(C20:4N6)	Free Fatty Acid	303.2	304.2	[M-H]-	1.65538	1.69766	2.22478	1.2013	1.6264	1.84158	0.596797	0.915079	0.747206	1.05344	1.81617	1.79718	1.51023	1.43115	1.3283	1.47934	0.749434	1.03587	1.30299	1.07025	0.838141	0.81292	1.44752	1.04434	1.24981	0.845176	1.56669	1.26071	1.14128	1.43205	1.52244	1.48893	1.00893	0.730438	0.551784	1.39109	0.404542	0.758305	1.04511	0.811396	0.774761	0.616614	0.849982	0.547782	0.855761
Α-Linolenic Acid(C18:3N3)	Lipids-Fatty Acid	277.2	278.22	[M-H]-	0.470658	0.911833	1.07149	0.804079	0.697332	1.01357	0.857629	0.715511	0.454037	0.538624	0.933402	0.557681	1.17541	1.01692	0.795051	1.12673	1.07612	1.4353	1.55531	0.437964	0.732401	0.793822	0.551505	1.21642	0.805368	1.40674	0.790143	1.37792	1.16809	1.44513	1.13362	1.94632	1.72596	0.252664	0.179195	1.47152	0.507185	0.725257	0.785932	1.02886	1.17266	0.67173	0.619511	0.402978	0.602774
Homo-Gamma-Linolenic Acid (C20:3)	Lipids-Fatty Acid	305.25	306.25	[M-H]-	1.1973	3.15353	2.36519	1.18989	1.36439	2.31657	0.690129	1.00329	1.12693	0.70801	2.46859	1.43395	1.14003	1.3861	1.10081	1.58485	0.896889	1.38719	1.48563	0.833133	0.666278	0.59973	1.09896	1.33703	1.20896	1.55012	1.73205	2.85193	1.54108	1.92046	2.25157	1.86795	1.66247	0.669585	0.226827	1.74662	0.32696	0.389437	0.640014	0.947864	1.23284	0.553825	0.458109	0.25313	0.649898
Urocanic Acid(Rg)	Organic Acid And Its Derivatives	137.04	138.043	[M-H]-	0.988083	1.03756	1.04464	1.02106	1.01944	1.09935	1.60828	1.04713	0.986064	1.08171	0.926933	1.17646	1.145	1.15621	1.03719	1.10421	1.34834	0.897724	0.998523	1.07165	1.14024	1.0706	1.10799	1.04096	1.0709	1.12865	1.08114	1.03322	1.03954	0.982192	1.01223	0.957464	0.949887	0.923067	0.994004	0.868344	0.882852	0.95435	0.877108	1.00821	0.991874	0.91791	0.909284	0.908299	0.893156
(S)-(-)-2-Hydroxyisocaproic Acid	Organic Acid And Its Derivatives	131.08	132.079	[M-H]-	0.595171	1.1411	0.955529	0.709005	0.750054	0.979376	1.25587	0.828538	0.808638	0.505174	0.90261	1.03063	0.508404	0.589493	0.728329	0.67205	0.65365	0.403484	0.58967	0.353952	0.375254	0.431921	0.677165	0.758926	0.50992	0.902924	0.661664	0.50708	0.751849	0.764571	0.948234	0.608971	0.448006	0.781501	1.38843	2.47884	2.71617	1.14824	0.667487	1.52854	2.79881	1.65283	1.59535	1.14889	1.01752
D-Xylonic Acid Lithium Salt	Organic Acid And Its Derivatives	165.05	166.048	[M-H]-	0.353825	0.269869	0.421254	0.300739	0.427174	0.198829	0.29614	0.239186	0.184918	0.380068	0.156148	0.201618	0.321728	0.348745	0.174696	0.229879	0.235483	0.160542	0.243073	0.084265	0.224696	0.180328	0.212219	0.234572	0.18628	0.153941	0.130136	0.283426	0.247894	0.229	0.119214	0.232073	0.25112	1.37713	1.83809	0.91112	1.44174	1.73122	1.17884	0.267302	0.701505	0.652251	2.57275	1.2688	1.99078
3-(3-Hydroxyphenyl)Propionate Acid	Organic Acid And Its Derivatives	165.06	166.063	[M-H]-	1.17361	12.2546	0.910339	1.45481	2.28124	0.31589	0.177448	1.49438	0.410278	1.31392	0.769781	0.182272	0.104612	0.500112	0.805235	1.10521	0.411035	0.244853	0.680595	0.364647	0.114132	0.254186	3.15067	0.448097	0.117523	1.0833	0.105806	0.614297	1.76226	1.82937	0.351766	0.613669	0.259797	0.622658	0.133387	0.786639	0.0913385	0.305417	1.51666	0.710795	0.75524	0.0648297	0.367814	0.103968	0.279511
4-Hydroxycoumarin	Phenylpropanoids	163	162.032	[M+H]+	0.755963	0.4337	0.380158	0.279591	0.380859	0.510414	0.279942	0.265477	0.467093	1.35617	0.562067	1.61354	2.16962	0.419005	0.251066	0.20208	1.50389	0.895125	0.532081	0.677278	2.06387	1.95145	0.522822	2.84422	0.660402	0.372786	4.68376	1.70908	0.182144	1.24738	0.431491	1.79269	1.44404	0.187191	0.71782	1.01992	0.478046	2.71212	0.461821	0.915485	1.5678	0.730548	1.53618	2.8449	0.900576
2-(Formylamino)Benzoic Acid	Benzoic Acid And Its Derivatives	164.04	165.043	[M-H]-	0.839899	1.1244	0.732677	0.901564	1.63987	0.755298	0.986355	0.935563	1.0832	0.997784	0.821057	1.25468	0.656435	1.36412	0.624763	0.808619	0.682632	0.668259	0.891008	0.590554	1.02441	0.776212	0.998146	0.988537	1.09454	0.978043	1.14753	0.83662	0.545483	0.914499	0.974459	0.788715	0.671267	0.707377	1.25566	0.594436	0.720226	1.10003	1.0835	0.875582	0.841136	0.664866	1.71547	0.355419	0.974209
Uridine 5-Monophosphate	Nucleotide And Its Derivates	323	324.036	[M-H]-	0.248307	0.392439	0.39953	0.615477	0.737827	0.558755	1.15707	0.938115	1.5175	0.970258	0.632866	0.953133	0.808951	0.834584	0.575649	0.575782	0.857801	0.617752	0.567675	0.546043	0.223237	0.522271	0.449017	0.805733	0.583362	0.761198	0.456587	0.73338	0.759602	0.761776	0.706357	0.754317	0.480067	1.47152	0.520598	1.32636	1.44028	0.592891	1.30815	0.787744	1.35324	1.37428	1.19325	1.15846	1.62189
N-Acetylglycine	Amino Acid And Its Derivatives	116	117.043	[M-H]-	0.244917	0.292862	0.783227	0.535818	0.793004	0.397337	0.639233	0.741754	0.400877	0.381914	0.540474	0.951922	0.545998	0.8282	1.54109	0.634457	0.460684	0.679548	0.877415	0.581459	0.467953	0.287895	0.649136	0.30155	0.85478	0.177457	1.58052	0.868418	1.87251	0.414251	0.764186	0.759808	0.576614	1.17228	0.816726	0.498089	1.12557	0.873805	0.883876	0.749179	0.594747	1.66105	0.703929	2.22096	3.28978
Threonate	Co-Enzyme?Factor	309.02	310.021	[M-H]-	0.21262	0.379896	0.619515	0.244151	0.261684	0.281544	0.280917	1.19414	0.369956	0.613127	0.554032	0.337431	0.631268	0.362904	0.64242	0.3344	0.434955	1.16127	0.975133	0.183023	0.248426	0.470118	0.656062	0.798415	0.710063	0.616319	0.577527	1.79864	0.638998	0.711818	0.750708	0.865594	0.787616	0.51315	0.437593	0.687758	0.414589	0.379294	0.691029	1.19392	0.394992	0.980878	0.921441	1.19911	1.53814
Trans,Trans-Muconic Acid	Organic Acid And Its Derivatives	141.03	142.027	[M-H]-	1.07652	1.08931	1.08217	1.09052	1.11048	1.12743	1.03136	0.990454	1.0033	1.05136	1.02094	1.0349	1.05271	1.04662	1.03637	1.00932	1.01114	0.991508	1.01233	1.03753	1.03639	0.995439	1.02505	1.05261	1.03805	1.04805	0.990961	1.01818	1.02859	1.01182	1.03374	1.01692	1.04598	1.01861	1.04723	1.00813	1.0866	1.05983	1.0479	1.0006	0.989954	0.976753	0.996911	0.995175	1.00626
2-Methylglutaric Acid	Organic Acid And Its Derivatives	145.06	146.058	[M-H]-	0.249073	0.136062	0.313717	0.20603	0.321453	0.29846	1.07321	0.160012	0.181644	0.287158	0.260451	0.284279	0.540886	0.363567	0.455995	0.386525	0.312778	0.395461	0.261327	0.20461	0.21831	0.20561	0.154089	0.334791	0.530861	0.428926	0.12223	0.65956	0.579327	0.728071	1.53398	0.419125	0.245885	1.02038	0.61976	0.953424	0.546528	1.92171	0.561598	0.776794	0.239851	0.599453	0.639036	0.327215	1.76217
3-Hydroxyhippuric Acid	Organic Acid And Its Derivatives	194.05	195.053	[M-H]-	0.567713	10.4317	0.0187843	0.94843	1.90871	0.275785	0.0949953	0.454717	0.326261	1.92786	0.452738	0.17456	0.483949	0.300875	0.570443	0.621388	0.423142	0.343396	0.415948	0.226707	0.927488	0.13393	1.3112	0.313767	0.0854627	0.486618	0.151311	0.156441	1.81205	1.04074	0.241791	0.372583	0.271786	0.0832069	0.381868	0.0635414	0.542015	1.24523	1.91493	0.0458627	0.333792	0.119973	1.62241	0.129717	1.30893
2-Dimethylamino	Nucleotide And Its Derivates	310	311.123	[M-H]-	0.14159	0.262554	0.170242	0.187496	0.254206	0.181181	0.192974	0.216306	0.191917	0.209711	0.192764	0.19356	0.246909	0.200751	0.215063	0.166138	0.172181	0.194911	0.131215	0.170292	0.142228	0.178466	0.183755	0.242624	0.147066	0.151078	0.224681	0.161687	0.218253	0.200669	0.241123	0.176344	0.208523	1.47444	1.18038	0.709215	4.20479	2.04237	1.13036	0.585601	0.385666	0.576201	1.63378	0.67135	3.06246
5-Hydroxyhexanoic Acid	Organic Acid And Its Derivatives	131.08	132.079	[M-H]-	0.559527	0.665811	0.375102	0.536015	0.646711	0.542966	0.683724	0.518588	0.475262	0.627038	0.68346	1.53372	0.876284	0.681938	0.84614	0.556112	0.449718	0.704043	0.572709	0.430774	1.24436	0.471204	0.571486	0.530334	1.41827	0.800818	0.530374	0.685918	0.277923	0.637917	0.709006	0.617689	0.652942	0.732667	1.25962	1.04558	1.31143	4.25789	0.900702	0.496448	2.02013	0.542002	0.928723	0.757115	0.860142
Β-Pseudouridine	Nucleotide And Its Derivates	243	244.07	[M-H]-	0.293789	0.315778	0.339769	0.226129	0.309019	0.388022	0.279788	0.277849	0.319561	0.34773	0.283058	0.30738	0.377375	0.369788	0.345963	0.347579	0.330857	0.427696	0.327546	0.255575	0.324728	0.38303	0.353187	0.346095	0.372238	0.313311	0.338795	0.392658	0.337056	0.324032	0.302648	0.330274	0.277595	1.50136	2.17038	0.738398	3.14527	2.20597	1.54505	0.876928	0.732532	0.698075	1.96508	1.12253	2.16024
Methyl 3-Hydroxyphenylacetate	Benzoic Acid And Its Derivatives	165.06	166.063	[M-H]-	0.717704	1.13706	0.452512	0.96013	0.875047	0.673925	1.1751	0.534853	0.799487	0.638742	0.61195	1.31341	0.65109	0.805361	0.68007	1.0451	0.463033	1.13071	0.752801	0.690148	0.582132	0.510184	0.375403	0.565685	0.74866	0.628074	0.609721	0.678652	0.66203	0.745249	0.67951	0.807753	0.570575	0.70795	0.895356	0.713186	1.3892	1.30637	0.98209	0.666383	0.904971	0.521529	0.928593	0.656808	0.930846
N-Acetylthreonine	Amino Acid And Its Derivatives	160	161.069	[M-H]-	0.165347	0.322756	0.322591	0.275474	0.204786	0.180735	0.200878	0.544587	0.224164	0.470484	0.203741	0.139743	0.317371	0.197072	0.14658	0.175356	0.154709	0.388382	0.128626	0.171606	0.232166	0.300914	0.264773	0.179988	0.175156	0.485743	0.290857	0.241581	0.23712	0.216637	0.115185	0.210634	0.136252	1.32735	1.84665	0.976878	3.2726	1.80269	1.9236	0.689729	0.631261	0.54057	2.23499	0.847599	6.17954
3,4,5-Trimethoxybenzoic Acid	Benzoic Acid And Its Derivatives	211.07	212.069	[M-H]-	0.480902	0.275966	0.233994	0.320356	0.359632	0.353286	1.78668	0.814505	0.375623	0.431224	0.544359	0.471159	0.174984	0.766643	1.22702	0.302341	1.15937	0.195243	0.165692	0.801384	0.383002	0.934445	0.224067	0.428237	0.262275	0.331408	0.341591	0.418171	0.193287	0.403509	0.741353	0.192339	0.429099	0.813246	4.5015	0.491067	0.881061	1.76268	0.636727	0.917079	0.638038	1.80122	3.05873	1.1794	0.586574
Hypoxanthine-9-β-D-Arabinofuranoside	Nucleotide And Its Derivates	267.08	268.081	[M-H]-	0.330358	0.25934	0.179805	0.217481	0.183387	0.0748351	0.133065	0.326424	0.182895	0.134518	0.373478	0.461607	0.21047	0.154686	0.303611	0.0679747	0.0996867	0.173003	0.426078	0.242551	0.139246	0.303701	0.0753874	0.254854	0.266457	0.161161	0.393548	0.398516	0.215697	0.170073	0.340793	0.181771	0.096697	1.72532	1.10446	3.39874	0.109191	0.112808	0.692031	3.91631	7.04314	0.740178	3.1279	1.55581	0.200198
Allopurinol	Nucleotide And Its Derivates	135	136.039	[M-H]-	0.275993	0.390533	0.415255	0.256921	0.273346	0.321519	0.353813	0.224158	0.294123	0.376911	0.300418	0.288873	0.305857	0.29532	0.289443	0.247423	0.231398	0.323979	0.378103	0.200816	0.231171	0.362566	0.350348	0.295406	0.293799	0.384245	0.222133	0.271197	0.236236	0.25481	0.35142	0.278168	0.267395	2.5275	0.840979	2.45302	0.396295	0.882766	0.881103	1.75862	1.80809	0.655282	0.86824	0.963799	1.54412
4-Hydroxyretinoic Acid	Vitamine Related	315.2	316.204	[M-H]-	1.12671	1.37328	1.03325	0.887888	2.55137	2.45063	0.994227	1.5239	0.292463	0.706352	0.447195	1.49947	0.83713	1.1581	1.37477	0.555574	0.819459	1.51212	1.1561	0.859781	1.01197	1.76512	1.02662	0.817597	0.80607	0.303386	0.76154	0.37604	0.675547	0.744968	0.410696	0.963714	0.893626	0.752044	0.689805	0.399428	0.467389	0.542474	0.468103	0.328395	0.839231	0.255126	0.512961	0.762151	0.301283
D-Glucopyranose	Carbohydrates	179	180.063	[M-H]-	0.91872	0.946784	0.699324	0.666383	0.572838	1.19927	0.779897	1.25071	0.767357	0.953497	1.3148	0.856569	1.19387	0.918806	1.12236	1.25322	1.06313	0.893056	1.01356	0.86309	0.893208	0.994361	1.85782	1.11365	1.25522	0.890525	1.23218	1.04417	1.39607	1.51723	1.19428	1.44198	1.21192	1.0378	2.00509	0.819551	1.23977	1.08933	0.784849	0.932934	0.552449	0.348235	4.00593	0.816214	0.432287
Deoxyribose 5-Phosphate	Nucleotide And Its Derivates	213	214.024	[M-H]-	1.41739	1.20082	1.48	1.37906	0.887698	1.18835	1.85178	1.12316	1.23845	1.31737	1.334	1.37325	1.16535	1.22361	0.71786	0.848883	1.16464	0.935362	0.636846	1.32318	0.956568	0.928347	0.725534	0.88806	0.852201	0.943992	1.21508	1.12251	0.868257	0.817462	0.612772	0.807994	0.975214	1.01286	1.12237	0.897291	1.10228	0.951294	0.939481	1.21801	0.840394	0.777912	0.973829	0.943953	0.969383
Oxoadipic Acid	Organic Acid And Its Derivatives	159.1	160.037	[M-H]-	1.52061	1.20206	1.05674	0.975446	0.770964	1.17503	1.99155	0.854853	0.662267	0.766246	1.13501	0.568206	1.04035	1.12085	1.43224	0.860332	1.27298	1.465	0.826908	1.0754	1.56245	0.710995	0.713178	0.831732	1.34142	0.699228	1.69714	0.794393	0.998521	0.768227	1.61617	0.788472	0.829345	0.710498	0.738589	0.759573	0.480634	0.796088	0.622534	1.19787	1.16301	0.92534	0.488491	0.907373	1.06033
3-Methoxy-4-Hydroxyphenylethyleneglycol Sulfate	Organic Acid And Its Derivatives	263	263.023	[M-H]-	0.160719	0.18443	0.141652	0.133386	0.176786	0.131043	1.22186	0.268988	0.162419	0.127815	0.241486	0.260459	0.225459	0.338907	0.307297	0.284919	0.296541	0.411152	0.279448	0.340313	0.335418	0.37555	0.292394	0.295091	0.285348	0.321607	0.27475	0.698966	0.179027	0.335264	0.384278	0.227012	0.544212	1.12088	2.54009	0.608891	4.27886	4.55586	0.532467	0.205479	0.564355	0.344806	2.42711	0.0991397	5.93261
1-Methyluric Acid	Organic Acid And Its Derivatives	181	182.044	[M-H]-	0.0753361	0.513251	0.714305	0.158587	0.380801	0.177964	0.847282	0.452662	0.0893428	0.621835	0.452129	0.0585074	0.925251	0.0675432	0.0682666	0.194192	0.360369	0.254448	0.0691589	0.0592175	0.432972	0.339985	0.0951156	0.163727	0.42901	0.0931661	0.200325	0.493123	0.0891707	0.0710781	0.0918077	0.0767417	0.0816985	1.40806	1.1377	0.396567	5.84412	7.01203	0.76832	0.310421	0.212664	0.558784	1.4357	0.385718	3.313
Ibuprofen	Organic Acid And Its Derivatives	205.1	206.131	[M-H]-	0.850434	0.900217	0.933921	0.93359	0.82308	0.861712	1.15061	0.803994	1.31318	0.916004	1.09846	1.03083	0.813855	0.820698	0.806565	0.852203	0.818287	0.860706	0.850444	0.831232	0.743007	0.734334	0.74371	0.68998	0.908435	0.940529	0.844673	1.08217	0.847468	0.935397	1.04909	0.860878	0.865921	1.07409	1.16417	1.09554	0.981803	0.938253	1.08297	0.915008	0.823446	0.801205	0.986006	0.876434	0.941245
Aminomalonic Acid	Organic Acid And Its Derivatives	118	119.022	[M-H]-	0.927226	1.94927	1.07494	1.08132	1.29458	2.43781	1.04051	0.797099	0.783979	1.14184	0.997108	0.848015	1.20602	1.29406	1.29185	0.829436	0.770051	1.00307	1.16322	2.18559	1.28386	0.992032	1.34143	1.69761	1.01935	2.25503	0.590915	1.9333	1.16	0.826341	0.733242	1.20709	1.04189	0.575349	0.487502	0.825171	0.495638	0.651352	0.777575	0.909041	1.1657	0.899109	0.944288	0.741042	1.25405
3-Methyl-2-Oxobutanoic Acid	Organic Acid And Its Derivatives	115	116.047	[M-H]-	0.897398	1.48131	1.43115	1.07177	1.01838	1.32966	1.38986	1.34635	0.893004	0.972284	1.6486	2.01851	1.4922	1.52794	1.10706	1.83345	1.245	1.10072	0.882443	0.915683	0.842037	0.943903	1.53332	1.48994	1.09065	1.20925	1.45414	1.10944	1.21767	1.32552	1.63844	1.31214	1.14821	0.468901	0.736684	1.32212	0.807284	0.574047	0.588739	0.867531	0.782676	0.722195	0.873961	0.60341	0.95674
Β-Hydroxypyruvic Acid	Organic Acid And Its Derivatives	103	104.011	[M-H]-	0.222671	0.301671	1.01893	0.541028	0.702966	0.226213	0.608504	0.381787	0.113834	0.191463	0.660336	1.36614	1.28914	0.637289	0.301282	0.368349	0.518938	1.17347	1.99709	0.147482	0.337977	0.340103	0.508845	0.270986	1.13535	0.356101	0.948202	0.663542	0.276019	0.454842	0.0887776	0.380255	0.922285	0.0473444	0.273806	1.55091	1.00066	4.00652	0.413922	3.18835	0.15586	0.154943	0.201748	0.0883082	5.59949
Palmitaldehyde	Others	239	240.245	[M-H]-	0.436419	0.388487	0.835062	0.400711	0.2768	0.397021	0.144301	0.348651	0.166724	0.309587	0.104076	0.15229	0.109466	0.25438	0.206139	0.0783196	0.173622	0.184862	0.210972	0.369605	0.631066	0.193998	0.353338	0.304921	0.352064	0.272772	0.182265	0.199213	0.180848	0.464366	0.357094	0.255399	0.667955	2.02684	1.57176	1.28886	0.379374	0.344915	0.409456	0.751888	0.359976	0.847869	0.461831	0.457907	0.493399
Allysine	Others	144.1	145.074	[M-H]-	0.492481	0.481719	0.380138	0.576467	0.932253	0.477305	0.252011	0.426313	0.53219	0.393701	0.39652	0.27293	0.388716	0.34202	0.15432	0.41676	0.384839	0.39876	0.861126	0.367094	0.442676	0.418055	0.498342	0.442416	0.425001	0.490814	0.320819	0.641887	0.611497	0.283198	0.292726	0.584903	0.294882	0.32786	2.3302	1.4386	2.6455	2.2881	0.756115	0.637593	0.486559	0.294178	4.94613	0.900172	1.23276
9-Hotre	Lipids_Fatty Acids	293	294.219	[M-H]-	0.4637	1.04452	1.08472	1.10465	0.560682	1.1763	1.77734	0.867291	1.11219	0.883318	0.708378	0.528639	1.48505	1.00824	0.717795	2.22643	0.836141	0.828624	1.33775	0.439956	1.29985	1.16566	0.596487	1.54438	0.690268	6.46338	0.733153	1.26119	1.65786	1.52554	2.51717	1.15509	0.959531	1.40076	1.07654	2.33574	1.32732	0.475853	1.04496	2.44196	0.417925	2.04623	1.2313	0.443124	1.36748
8,15-Dihete	Lipids_Fatty Acids	335.1	336.23	[M-H]-	0.886578	1.6274	0.846603	0.63975	0.825435	1.45414	1.83989	1.10909	0.500806	0.815388	1.01196	0.369151	1.57059	1.72807	1.50321	3.8196	0.717221	3.85715	0.794344	2.32112	1.58409	1.58432	1.1122	0.968657	0.541318	1.8812	0.650294	0.452672	0.652811	1.58268	0.812643	0.354214	0.59171	0.252333	0.376658	0.251104	0.344485	1.35969	0.956997	0.454791	0.609387	0.591855	0.173884	1.48504	0.279198
13-Hotre(R)	Lipids_Fatty Acids	293	294.219	[M-H]-	1.10861	1.3554	1.09981	1.2358	0.876366	1.13098	1.10999	0.854719	1.23987	0.740288	1.25469	1.00545	0.751131	0.800172	0.965741	1.08412	1.15698	1.01012	1.05559	0.999837	0.851412	0.635627	1.09703	0.765537	1.293	0.935003	1.1346	0.914775	0.66866	0.940086	1.48281	1.09817	1.00864	0.899181	0.85667	1.04346	0.832835	0.87982	0.995004	1.27655	1.16371	1.39545	0.993454	1.13469	1.01588
N-Acetylmethionine	Amino Acid Derivatives	190.1	191.062	[M-H]-	0.138921	0.0954376	0.155385	0.312604	0.314256	0.378146	0.21342	0.261681	0.247095	0.3777	0.273916	0.30242	0.179292	0.343365	0.121717	0.34312	0.214061	0.447841	0.14891	0.669904	0.160584	0.347916	0.552071	0.179522	0.271551	0.292765	0.245594	0.469909	0.196482	0.215578	0.170807	0.204829	0.130509	1.90777	2.98041	1.70562	1.39601	2.91592	2.71926	0.601481	0.403975	1.50253	2.2863	1.1289	4.00719
Group A, Healthy controls
Group B, AAV patients with renal involvement
[truncated: 31 more columns]
